# 1 Mitotic R-loops direct Aurora B kinase to maintain 2 centromeric cohesion

3 Erin C. Moran<sup>1</sup>, Limin Liu<sup>1</sup>, Ewelina Zasadzinska<sup>1</sup>, Courtney A. Kestner<sup>1</sup>, Ali Sarkeshik<sup>2</sup>, Henry  
4 DeHoyos<sup>1</sup>, John R. Yates III<sup>2</sup>, Daniel Foltz<sup>3</sup>, P. Todd Stukenberg<sup>1,\*</sup>

5  
6 <sup>1</sup>Department of Biochemistry and Molecular Genetics, University of Virginia, School of Medicine,  
7 Charlottesville VA 22903

8 <sup>2</sup>Department of Molecular Medicine, The Scripps Research Institute, La Jolla CA 92037

9 <sup>3</sup>Department of Biochemistry and Molecular Genetics, Feinberg School of Medicine,  
10 Northwestern University, Chicago IL 60611

11 \*Corresponding Author

## 14 Abstract

15 Recent work has shown that R-loops exist at mitotic centromeres, but the function of these R-loops  
16 is not well understood. Here, we report that mitotic R-loops arise in distinct locations from those  
17 formed during interphase. They accumulate on chromosome arms in prophase, where they are  
18 quickly resolved and continue to be produced at repetitive sequences including centromeres during  
19 a mitotic stall. Aurora B kinase activity is required to resolve R-loops during prophase and R-loops  
20 promote the localization of the Chromosome Passenger Complex (CPC) to the inner centromere.  
21 CPC purified from mitotic chromosomes interacts with thirty-two proteins involved with R-loop  
22 biology. One of these, the RNA regulator RBMX, controls Aurora B localization and activity in  
23 vivo. Perturbations in R-loop homeostasis or RBMX cause defects in the maintenance of  
24 centromeric cohesion due to the mislocalization of the CPC. We conclude that R-loops are  
25 generated by mitotic processes in repetitive DNA sequences, they play important roles in mitotic  
26 fidelity, and we have identified a set of mitotic R-loop regulators including the CPC and RBMX  
27 that will enable future studies of mitotic R-loops.

28  
29  
30

31

32

### 33 **Introduction**

34

35 Mitosis is characterized by a reorganization of chromatin structure as most transcription is  
36 silenced and terminated (Gottesfeld and Forbes, 1997; Jiang et al., 2004; Taylor, 1960), the higher  
37 order structure of chromatin such as topologically associating domains (TADs) are removed  
38 (Naumova et al., 2013), and chromatin is condensed. R-loops are three stranded structures in which  
39 a strand of RNA is annealed to a denatured double-stranded DNA. R-loops have distinct roles in  
40 interphase cells such as transcriptional initiation and termination (Ginno et al., 2012, 2013;  
41 Skourti-Stathaki et al., 2014), chromatin compaction (Castellano-Pozo et al., 2013a; Nakama et  
42 al., 2012), and both as a source of DNA damage (Bhatia et al., 2014; Costantino and Koshland,  
43 2018; Gan et al., 2011; Wahba et al., 2011) and DNA damage repair (Ohle et al., 2016; Yasuhara  
44 et al., 2018). In mitotically arrested cells, R-loops localize to centromeres, are associated with a  
45 centromeric DNA damage response (Kabeche et al., 2018) and form the basis of centromeric  
46 chromatin loops in maize cells (Liu et al., 2020). However, the function of R-loops at the  
47 centromere is poorly understood, and there are major unanswered questions including: whether R-  
48 loops arise during an unperturbed mitosis, if they arise only in centromeric sequences, if R-loops  
49 are resolved as mitosis progresses, and what is the consequence of not generating mitotic R-loops  
50 to mitotic cells.

51 Aurora B kinase-dependent H3S10 phosphorylation increases in *S. cerevisiae* strains that  
52 accumulate R-loops (Castellano-Pozo et al., 2013a), however it is not clear if Aurora kinases play  
53 an active role in regulation of R-loops. It was recently reported that mitotic R-loops are required  
54 to activate Aurora B kinase, a major regulator of mitotic events, and this signal is downstream of  
55 ATR and CHK1 signaling in the DNA damage response (Kabeche et al., 2018). Aurora B kinase  
56 is directly phosphorylated by CHK1 to regulate kinase activity (Petsalaki et al., 2011). Aurora B  
57 kinase regulates multiple important steps in mitosis, such as the spindle assembly checkpoint  
58 (Biggins and Murray, 2001; Hauf et al., 2003; Kallio et al., 2002; Sacristan and Kops, 2015;  
59 Santaguida et al., 2011; Stukenberg and Burke, 2015), sister chromatid cohesion (Dai et al., 2006;  
60 Resnick et al., 2006; Tanno et al., 2010), and kinetochore-microtubule attachment regulation  
61 (Cimini et al., 2006; Knowlton et al., 2006; Liu et al., 2009; Meppelink et al., 2015; Salimian et

62 al., 2011; Welburn et al., 2010). Aurora B kinase associates with three other proteins to form the  
63 Chromosome Passenger Complex (CPC). The CPC has a very dynamic localization during  
64 prophase; it is initially localized throughout condensing chromosomes, transitions to the axis  
65 between sister chromatids, then to the inner centromere (Carmena et al., 2012; Hindriksen et al.,  
66 2017; Hirota et al., 2005; Jeyaprakash et al., 2007; Klein et al., 2006; Nozawa et al., 2010). One  
67 function of Aurora B on chromosome arms is to remove most interphase cohesin, which is likely  
68 the pool at the base of TADs (Losada et al., 2005; Naumova et al., 2013). Paradoxically, sister  
69 chromatid cohesion is maintained at inner centromeres, where Aurora B is highest during late  
70 prophase until anaphase onset. This is due to a Sgo1-dependent mechanism, whereby Sgo1 recruits  
71 the B56-PP2A phosphatase complex in order to maintain cohesion (Kang et al., 2011; Kitajima et  
72 al., 2006; Meppelink et al., 2015; Tang et al., 2006). Centromeric CPC is required to maintain  
73 sister chromatid cohesion at the centromere (Dai et al., 2006; Resnick et al., 2006), but the  
74 mechanism of this activity is less clear.

75         There is growing evidence that transcripts are made from centromeres in multiple species,  
76 but the functions of these transcripts are poorly understood. The human centromere is made up of  
77 alpha satellite DNA, forming Higher Order Repeat (HOR) structures (Willard, 1985). HORs are  
78 flanked by pericentric heterochromatin, which is formed by alpha satellite monomers and other  
79 satellite sequences such as beta and gamma satellites, as well as Human Satellite I and II sequences.  
80 The alpha satellite HOR sequences are transcribed in G2/M cells (Hall et al., 2014; Ideue et al.,  
81 2014; Liu et al., 2015). Active RNA Polymerase II has been detected at human centromeres in  
82 multiple circumstances (Chan et al., 2012; Liu et al., 2015; McNulty et al., 2017); this transcription  
83 is well conserved across species. These RNAs are known to be spliced in some organisms (Grenfell  
84 et al., 2016; Liu et al., 2020), and in *Xenopus laevis* these spliced transcripts are known to interact  
85 with the CPC, which is required to localize the CPC (Blower, 2016; Grenfell et al., 2016;  
86 Jambhekar et al., 2014). Recent efforts to identify RNAs associated with chromatin has also shown  
87 that RNA made from human centromeres associate with the chromatin *in cis* (McNulty et al., 2017)  
88 and have long half-lives (Hall et al., 2014; McNulty et al., 2017) suggesting they are stabilized in  
89 some way. Multiple components of the human spliceosome have now been found to be important  
90 for cohesion (Huen et al., 2010; Karamysheva et al., 2015; van der Lelij et al., 2014; Nishimura et  
91 al., 2019; Sundaramoorthy et al., 2014), but the mechanism of how these proteins regulate cohesion  
92 is unclear. Recent efforts to identify proteins associated with R-loops (Cristini et al., 2018) have

93 also identified many splicing proteins, suggesting that the mechanism of activity for these proteins  
94 involves R-loop homeostasis during mitosis.

95 We present evidence that R-loops accumulate on chromosomes during prophase, that they  
96 are resolved during mitosis and this resolution requires the CPC. In addition, R-loops are required  
97 to promote CPC localization to the inner centromere. We purified the CPC from mitotic  
98 chromosomes and identified 32 proteins that interact with R-loops, including the cohesion  
99 regulator RBMX. We show that R-loops and RBMX are required to localize the CPC to inner  
100 centromeres and this promotes localization of Sgo1 to protect centromeric cohesion. This work  
101 provides a function for mitotic R-loops that is distinct from interphase roles and provides a new  
102 function for the pool of chromatin-based Aurora B kinase in resolving R-loops in mitosis.

103

## 104 **Results**

105 *R-loops are found at repetitive regions in mitotic cells.*

106 We investigated the genomic loci on mitotic chromosomes that contain R-loops and further  
107 tested whether there is a population of R-loops that are regulated by Aurora B kinase (Castellano-  
108 Pozo et al., 2013). Specifically, we performed DNA-RNA IP using S9.6 monoclonal antibody,  
109 which recognizes RNA-DNA hybrids (Boguslawski et al., 1986), followed by high throughput  
110 sequencing (DRIP-seq) on cells stalled in mitosis for 24 hours with colcemid and then treated with  
111 either DMSO, or two different Aurora B inhibitors AZD1152/Barasertib (AZD) or ZM447439  
112 (ZM) for the last hour. Each sample had a paired RNaseH1 treated sample to show specificity of  
113 the IP. The DNA sequence reads were mapped to the human genome (hg38) and peaks were called  
114 by MACS2 (Feng et al., 2012; Zhang et al., 2008). We validated that the peaks were at R-loops  
115 by comparing an average line profile of the peaks in each treatment to the average line profile in  
116 the RNaseH1 treated control IPs. An example peak profile is shown in Figure 1A, where the called  
117 compiled peaks (~90,000 peaks per treatment) were approximately ten-fold enriched relative to  
118 their respective RNaseH1-treated sample.

119 We first asked if R-loops are in the same locations as in interphase cells or whether new  
120 R-loops are formed during mitosis. We compared the called peaks of our mitotic DRIP-seq  
121 samples to publicly available data from asynchronous cells that were prepared using a similar IP  
122 protocol, sequenced to a similar depth and in cells with a similar karyotype as the cells used in our  
123 experiment (Nadel et al., 2015). Significantly more R-loops were found on repeat elements in



124 mitotic cells compared to interphase cells. In addition, there was a decrease in peaks in promoters  
125 and genes in mitotic cells (Figure 1B), which included a drastic loss of R-loop accumulation across  
126 gene bodies and transcriptional termination sites in the mitotic samples (Figure 1C, D). The  
127 repression of DRIP signal within mitotic cells is consistent with the silencing of transcription  
128 during mitosis (Parsons and Spencer, 1997; Prescott and Bender, 1962; Taylor, 1960). These data  
129 suggest that mitotic R-loops are distinct from interphase R-loops, which is a consequence of the  
130 general termination of transcription that happens as cells enter mitosis and an accumulation of new  
131 R-loops at repetitive regions in the genome.

132 We next determined if peaks were regulated by Aurora B. Peaks that existed in mitotic  
133 control samples were more enriched after treatment with Aurora inhibitors (Figure 1E, left) and  
134 new peaks also appeared (Figure 1E, right). A larger percentage of the R-loops were found at  
135 repetitive elements after the addition of Aurora inhibitors for 1 hour (Figure 1B). There was not a  
136 dramatic change of R-loops in gene bodies or transcriptional start sites after Aurora B inhibition  
137 (Figure 1C, D) however, there was an increase in the number of R-loops at transcription  
138 termination sites. This is consistent with the recently identified role of Aurora B as a driver of the  
139 mitotic termination of transcription by its ability to remove cohesin from chromatin (Perea-Resa  
140 et al., 2020).

141 We focused on the enrichment of R-loops at repetitive elements in mitotic cells, since there  
142 was both a drastic increase in peaks called within repetitive elements in the mitotic samples and  
143 these further increased upon treatment with Aurora B inhibitors (Figure 1E). We devised a pipeline  
144 to identify the repetitive elements that were enriched in our DRIP-seq samples. The input samples  
145 were run through a De Bruijn graph algorithm to build a de novo database of repeat elements from  
146 DLD1 cells (Novák et al., 2010, 2013). We then aligned our DRIP-seq samples to this database  
147 and calculated enrichment values for each repetitive element. The repetitive elements were  
148 defined using the Dfam database (Hubley et al., 2016), and classified as subtype Transposable  
149 elements (Figure 1F, blue scale), subtype Satellite (green scale) or neither (black). R-loops  
150 accumulated (greater than 2-fold) at alpha-satellite repeats (ALR), scaffold attachment repeats  
151 (SAR), and Human satellite II repeats (HSATII) in mitosis and these further accumulated after  
152 Aurora B inhibition (Figure 1F). Our pipeline identified three distinct alpha-satellite clusters that  
153 represent slightly different sequences. All three were enriched in mitosis and further enriched after  
154 Aurora B inhibition with both AZD and ZM (treated as duplicates, averaged in Figure 1F, and

155 shown in 1G,  $p < 0.001$ ). We determined the relative frequency of a set of published HOR-specific  
156 24-base k-mers (Miga, 2017) in asynchronous, DMSO treated mitotic and Aurora B inhibited  
157 mitotic samples to test this enrichment in a complimentary manner. Almost all of the alpha-satellite  
158 k-mers were enriched greater than 2-fold in mitosis and these were further enriched after treatment  
159 with Aurora B inhibitors (Figure 1H, I,  $p < 0.0001$  for each pair in I). This enrichment is not  
160 apparent in samples treated with RNaseH, demonstrating specificity of the alpha-satellite  
161 enrichment. We conclude that R-loops accumulate in repetitive elements including alpha-satellite  
162 sequences during mitosis, and that Aurora B activity is required to deplete these R-loops.

163

#### 164 *Dynamics of mitotic R-loops*

165 We localized R-loops by immunofluorescence using the S9.6 monoclonal antibody on  
166 randomly cycling RPE1-T-REx cells to measure the dynamics of mitotic R-loops in a non-arrested  
167 cell population (Figure 2A). Cells were co-stained using Anti-Centromere Antibody (ACA) and  
168 the DNA-specific dye 4',6-diamidino-2-phenylindole (DAPI). We quantified the R-loop signal  
169 intensity at centromeres and chromatin, using a 3D mask containing ACA signal to specify  
170 centromeres and a 3D mask created by DAPI staining as a chromatin signal. We then extrapolated  
171 the chromosome arm signal by subtraction of the centromere area from the chromatin mask. R-  
172 loop signals at both locations are highest in prophase cells, followed by a gradual decline in R-  
173 loop signal through the course of mitosis. The differences in centromeric R-loop intensities were  
174 significant in each of the distinct stages of mitosis, and the levels of centromeric R-loops had  
175 returned to interphase levels by anaphase (Figure 2B and Supplemental figure 1). Chromosome  
176 arm R-loops were also highest in prophase, but declined rapidly, to the point where they were  
177 statistically indistinguishable from interphase by metaphase (Figure 2C and Supplemental figure  
178 1). This suggests that R-loops form during chromosome condensation across chromosomes but are  
179 restricted to centromeres after prophase. Centromeric R-loops persist longer but are resolved by  
180 anaphase onset.

181 We analyzed the intra-nuclear location of prophase R-loops more precisely using confocal  
182 microscopy. Prophase R-loops were not observed uniformly across all chromosomes, and some  
183 chromosomes were depleted of R-loop foci. The most striking feature was that R-loops form along  
184 nuclear rims, which are classically associated with heterochromatin in interphase cells (Figure 2D,  
185 line scan in Figure 2E, right; additional prophase nuclei available in Supplemental figure 1). We

186 noticed that R-loop foci localized to areas with low DAPI staining within the nuclei of prophase  
187 cells, suggesting they form before chromosomes are fully condensed. We quantified the brightest  
188 point of R-loop foci within the nuclei of cells. High R-loop foci were constrained to regions of  
189 relatively low DAPI intensity in each cell cycle state (Figure 2F, dark red points). Cells were  
190 continuously condensing chromatin over the cell cycle points measured. We noted that there was  
191 a gradual increase in DAPI intensity of the R-loop staining foci points as cells progress from  
192 interphase to prometaphase (Figure 2G). However, in each of the states, the high R-loop staining  
193 was always in low to moderate range of DAPI staining intensities (Figure 2F). This suggests that  
194 R-loops form on condensing chromatin and potentially represent an intermediate of chromatin  
195 condensation. Our data suggests that R-loops are most highly associated with condensing  
196 chromatin in early mitosis and associated with heterochromatin at the nuclear periphery.

197

#### 198 *Aurora B kinase activity removes mitotic R-loops in randomly cycling cells*

199 We performed immunofluorescence using S9.6 and anti-ACA antibodies in addition to  
200 DAPI on asynchronous RPE1-TREX cells, as in figure 2, treated with Aurora B kinase inhibitors  
201 ZM447439 (ZM) or AZD1152 (AZD) for 1 hour. AZD generated minimal increases in R-loop  
202 levels in interphase DNA and centromeres when normalized to ACA ( $p < 0.01$  and  $p < 0.001$   
203 respectively), although this difference was not seen after ZM treatment ( $p = 0.5$  and  $p > 0.9$ ; Figure  
204 3A-C). In contrast, both Aurora B inhibitors increased the levels of R-loops on mitotic  
205 chromosomes and centromeres ( $p < 0.01$  and  $p < 0.001$  AZD-DAPI and AZD-ACA;  $p < 0.001$  and  
206  $p < 0.001$  ZM-DAPI and ZM-ACA respectively; Figure 3A-C). There was no significant difference  
207 in ACA levels after treatment with either Aurora B inhibitors, validating its use as a normalization  
208 parameter (Figure 3D, ANOVA  $p = 0.24$ ). Thus, we were able to confirm that Aurora B has a role  
209 in removing R-loops from mitotic cells using both DRIP-Seq and immunofluorescence.

210 We confirmed that Aurora B regulates centromeric R-loops as suggested by our DRIP-seq  
211 by performing DNA-RNA immunoprecipitation (IP) followed by quantitative PCR (DRIP-qPCR)  
212 utilizing primers to the X chromosome Higher Order Repeat of alpha-satellite (DXZ1 HOR) and  
213 to ribosomal DNA repeats (rDNA) in mitotically arrested cells. We found that treatment with  
214 either AZD or ZM for the last hour in cells stalled for 24 hours in colcemid caused at least a two-  
215 fold increase in R-loop accumulation at the DXZ1 HOR (Figure 3E-F). There is specificity for  
216 alpha-satellite sequences because Aurora B inhibitors had little effect on the accumulated R-loops

217 at the rDNA locus. We conclude that Aurora B regulates R-loops repetitive regions during mitosis,  
218 particularly at centromeric alpha-satellites.

219

### 220 *R-loops promote Aurora B localization and activation*

221 To determine the functions of R-loops during mitosis we created cells that express mCherry  
222 tagged *E. coli* RNaseH1 under a Tet-inducible promoter in HeLa-T-REx cells to generate an  
223 inducible system to deplete R-loops. We used clonal lines that expressed detectable levels of  
224 RNaseH1 within 8 hours of doxycycline-induced expression (Supplemental figure 2). Previous  
225 studies demonstrated that centromeric R-loops are required to activate the centromere pool of  
226 Aurora B but did not report a change to the amount of CPC (Kabeche et al., 2018). We localized  
227 the Aurora B kinase by immunofluorescence in order to determine if localization of Aurora B  
228 kinase is dependent upon R-loops. Induced RNaseH1 significantly depleted Aurora B intensity in  
229 mitotic cells compared to the same population of cells without RNaseH1 induction (Figure 4A and  
230 B) and compared with cells with induced expression of catalytically dead RNaseH1-2R mutant  
231 (Britton et al., 2014, Figure 4A and B). We stained chromosome spreads for S9.6 to observe R-  
232 loops and confirm that expression of RNaseH1-2R mutant does not deplete R-loops. Cells  
233 expressing the RNaseH1-2R mutant have R-loop staining throughout the chromosome  
234 (Supplemental figure 2).

235 We used a lentivirus to overexpress RNaseH1-EGFP in RPE1-TREx cells and then  
236 assessed intensity of Aurora B T-loop phosphorylation (pT232), as well as the signals that localize  
237 the CPC to the inner centromere, H3 pT3 and H2A pT120, in order to understand how R-loops  
238 control Aurora B activation and localization. Aurora B pT232 staining indicated a loss of auto-  
239 phosphorylated Aurora B in these cells after RNaseH1 overexpression (Supplemental figure 2)  
240 confirming that R-loops are involved in activation of the centromere pool of Aurora B (Kabeche  
241 et al., 2018) in addition to the pool on chromosome arms. We also observed a decrease in H2A  
242 pT120, one of the histone marks that serves as a localization signal (Figure 4C and 4D). We  
243 observed an increase in H3 pT3 throughout the chromosome, which explains the spread of Aurora  
244 B signal (Supplemental figure 2). This indicates that R-loops are required to reduce the H3 pT3  
245 signal, and potentially Haspin kinase on chromosome arms. Together our data suggest that R-loops  
246 affect both histone marks that localize the CPC to drive the movements from arm chromatin to the  
247 inner centromere.

248

249 *The CPC interacts with R-loop regulators including RBMX on mitotic chromosomes.*

250 Aurora B has many functions in mitosis so it could have direct or indirect roles in resolving  
251 R-loops. We hypothesized that if the CPC had a direct role in R-loop resolution it should be bound  
252 to chromatin with other proteins that resolve R-loops. We developed an approach to rapidly purify  
253 the CPC bound to chromatin liberated from mitotic chromosomes based on the LAP dual affinity  
254 tag (Cheeseman and Desai, 2005). We established four HeLa cells lines expressing LAP-Aurora-  
255 B, LAP-Borealin, LAP-Survivin or LAP only (Supplemental figure 3). The LAP-Survivin, and  
256 LAP-Borealin proteins localized to centromeres in mitosis (Supplemental figure 3). We rapidly  
257 isolated mitotic chromatin by a clarification centrifugation followed by pelleting mitotic  
258 chromatin. Chromatin was liberated by micrococcal nuclease treatment producing ladders that  
259 ranged from mononucleosomes to hexameric nucleosomes. The CPC from mitotic chromatin was  
260 tandem-affinity purified and the bound proteins were analyzed by MudPIT (Supplemental Table  
261 1, Supplemental figure 3), which identified a total of 111 proteins (Figure 5A). All three CPC  
262 complex members purified at least one other CPC member and no CPC proteins were identified in  
263 the LAP control preps. We identified Topo II $\alpha$ , Kif20a/MKLP2 and HP1 $\beta$  which have been  
264 previously shown to interact with the CPC (Coelho et al., 2008; Gruneberg et al., 2004; Kang et  
265 al., 2011; Morrison et al., 2002). The top three GO keywords for proteins identified were  
266 Phosphoproteins, Ribonucleoproteins, and RNA-binding, consistent with the fact that RNA has a  
267 major role in CPC activity (Figure 5B, Blower, 2016; Jambhekar et al., 2014). The majority (75%)  
268 of the RNA binding proteins that interact with the CPC were also purified in a S9.6 IP (the R-loop  
269 interactome, Figure 5B, Cristini et al., 2018). 35% of these proteins (11 proteins) were also  
270 identified as Aurora kinase substrates in phosphoproteomic screens. The fact that the CPC  
271 interacts with and phosphorylates R-loop proteins strongly suggests that the CPC has a direct role  
272 in controlling R-loops and all of these proteins are potential regulators of mitotic R-loops.

273 We initially focused on RBMX because it was identified in the R-loop interactome and is  
274 required for centromeric cohesion (Matsunaga et al., 2012). We confirmed that RBMX interacts  
275 with the CPC by co-IP (Figure 5C, D). The bulk of RBMX is cytoplasmic in mitosis (Matsunaga  
276 et al., 2012), but after extracting soluble proteins in RPE1-T-REx cells the majority of the  
277 remaining RBMX colocalized with ACA (Figure 5E) and this localization is dependent upon R-  
278 loops (Figure 5F and F'). We generated a cell line expressing LAP-RBMX to confirm whether

279 RBMX is enriched on centromeres. LAP-RBMX is greatly enriched at centromeres as measured  
280 by Chromatin Immunoprecipitation (ChIP) using primers against  $\alpha$ -satellite DNA (Figure 5G).  
281 We confirmed the localization by Proximity Ligation Assay (PLA), which measures the proximity  
282 of the GFP of the LAP tag to the CPC subunit Survivin in LAP-RBMX expressing cells. Cells  
283 were co-stained with antibodies to Borealin and tubulin to generate fiducial marks on inner  
284 centromeres and the spindle. PLA signals were found adjacent to Borealin at centromeres of  
285 metaphase cells (Figure 5H) and there was little signal if the Survivin antibody was not added to  
286 the reaction as a negative control. We conclude that RBMX is recruited to centromeres by R-loops  
287 where it interacts with the CPC.

288 We tested whether RBMX has a function in mitotic R-loop biology. We depleted RBMX  
289 by shRNA and co-stained the cells with anti-Aurora-B, ACA, and S9.6 antibodies to determine  
290 whether RBMX regulates Aurora-B and R-loops. RBMX protein levels were reduced as evaluated  
291 by western blot but the levels of Aurora-B, Survivin, and a set of cohesion regulators were  
292 unaffected by depletion of RBMX, suggesting RBMX does not interfere with transcription or  
293 protein stability of the CPC (Supplemental figure 4). Depleting RBMX affects Aurora B  
294 localization to centromeres as the amount of Aurora-B at inner centromeres of prometaphase cells  
295 was significantly reduced (Figure 6A-D). R-loop levels were significantly increased across  
296 chromatin in prometaphase cells, consistent with a loss of Aurora B activity (Figure 6A-B, Figure  
297 3). We also saw reduction in the levels of the Borealin subunit of the CPC and T-loop  
298 phosphorylation of Aurora B kinase (Supplemental figure 4). The reduction of CPC was seen with  
299 a second shRNA that reduced RBMX protein levels (Supplemental figure 4), in two cell types  
300 (RPE-T-REx cells and HeLa-T-REx cells, Figure 6A-D) and expression of shRNA resistant LAP-  
301 RBMX restored centromeric Aurora-B levels to cells treated with shRNA against RBMX (Figure  
302 6C, D). Thus, RBMX is required for centromeric accumulation of Aurora B and mislocalizing  
303 Aurora B is not an off-target effect of shRNA expression. RBMX is required for the histone marks  
304 that target the CPC to the centromere, but these marks can be restored by forced targeting Aurora  
305 B kinase activity to centromeres (Supplemental figure 5), demonstrating that RBMX is not  
306 required to generate the histone marks, but they are reduced in cells that are depleted of RBMX  
307 because Aurora B is missing. In conclusion, these data suggest that the RNA binding protein,  
308 RBMX, is recruited to centromeres by R-loops, where it recruits Aurora B to resolve R-loops.

309



310 *R-loops and RBMX are required to maintain centromeric cohesion and the role of RBMX in*  
311 *centromeric cohesion is to recruit Aurora B and Sgo1*

312 We have shown that RBMX is localized by R-loops (Figure 5) and it has been previously  
313 published that RBMX is required for centromeric cohesion (Matsunaga et al., 2012) To identify  
314 the function of mitotic R-loops, we tested whether loss of R-loops affects cohesion. We expressed  
315 RNaseH1 and RNaseH1-2R in HeLa-T-REx cells and performed mitotic spreads and quantified  
316 premature chromatid separation (PCS, Figure 7A). Centromeric cohesion was lost in cells  
317 overexpressing RNaseH1 but not in cells expressing RNaseH1-2R (Figure 7B). To test whether  
318 RBMX targets the CPC to generate centromeric cohesion, we depleted RBMX and induced CENP-  
319 B-INCENP (CB-INCENP) fusion protein expression to forcibly target the CPC to the centromere  
320 via CENP-B binding. RBMX depleted cells showed a PCS phenotype, however PCS was  
321 dramatically decreased when these cells were induced to express the CB-INCENP (Figure 7C).  
322 The loss of centromeric cohesion was restored by targeting the Aurora B to centromeric chromatin.  
323 We conclude that R-loops are required to maintain centromeric cohesion by RBMX-dependent  
324 recruitment of the CPC.

325 Sgo1 is a key regulator of centromeric cohesion, and Aurora B activity is required to  
326 localize Sgo1 to inner centromeres (Dai et al., 2006; van der Waal et al., 2012). We explored the  
327 relationship of the R-loops with the localization of Sgo1 to determine the mechanism by which  
328 RBMX and R-loops maintain centromeric cohesion. Expressing RNaseH1 reduced the  
329 centromeric levels of Sgo1 significantly ( $p < 0.0001$ , Figure 7D, E). Depletion of RBMX similarly  
330 reduced centromeric levels of Sgo1, and this could be recovered by forced targeting of the CPC  
331 by CB-INCENP (Figure 7F, G). We conclude that RBMX targets the CPC to recruit Sgo1.

332

333 *The pool of the CPC recruited by RBMX protects cohesion by recruiting Sgo1*

334 Our finding that targeting the CPC to centromeres can reverse the PCS that was induced  
335 by RBMX depletion suggested that this pool of the CPC is involved in protecting centromeric  
336 cohesion. It is difficult to assay a role for the CPC in centromeric cohesion because the CPC is  
337 required to remove cohesin from non-centromeric regions during prophase (Giménez-Abián et al.,  
338 2004; Losada et al., 2002; Nishiyama et al., 2013). Thus, even if cells depleted of Aurora-B lost  
339 centromeric cohesion the chromatids would remain cohesive through the chromosome arms. Arm  
340 cohesion is removed but centromeric cohesion is still preserved when human cells are arrested



341 with microtubule poisons for 2-3 hours (Giménez-Abián et al., 2004). We therefore modified an  
342 assay that previously showed that the CPC is required to maintain centromeric cohesion (Tanno et  
343 al., 2010). We generated a population of mitotic cells by initially synchronizing cells in S-phase  
344 by double thymidine block and then ten hours after release from thymidine we treated cells with  
345 colcemid for 3 hours to allow the cells to arrest in mitosis and lose arm cohesion. We then treated  
346 the cells with Aurora-B inhibitors for an additional two hours and measured PCS by mitotic  
347 spreads (Figure 7A). Forty percent of mitotic cells showed PCS when treated with 0.1 $\mu$ M  
348 Hesperadin while only 2% PCS occurred when treated with DMSO (Supplemental figure 6). There  
349 was a dose dependent increase of PCS when cells were treated with Hesperadin. Treatment of cells  
350 with ZM, a structurally different Aurora-B kinase inhibitor, also promoted PCS, demonstrating  
351 that Aurora-B activity is required for centromeric cohesion (Supplemental figure 6). To rule out  
352 the possibility that separase is prematurely activated under our experimental conditions; we treated  
353 cells with MG132, a proteasome inhibitor. We observed similar loss of cohesion in the presence  
354 or absence of MG132 (Supplemental figure 6).

355 To circumvent the concern that the CPC's role in cohesion is a consequence of prolonged  
356 mitotic arrest we complemented our findings by depleting Aurora-B by shRNA in a HeLa line that  
357 stably expressed LAP-CENP-A, visualized mitotic chromosomes by chromosome spreads, and  
358 measured the inter-kinetochore distance (Supplemental figure 6). All chromosomes maintained  
359 cohesion consistent with the requirement of the CPC to remove arm cohesion. However, there was  
360 a 36% increase of the inter-kinetochore distance on Aurora-B depleted chromosomes, supporting  
361 the hypothesis that Aurora-B is required for centromeric cohesion.

362 We determined the epistatic relationship between Aurora-B and Sgo1 in centromeric  
363 cohesion regulation. Forced targeting of Sgo1 to centromeres using a Cenp-B Sgo1 fusion protein  
364 partially rescued Hesperadin-induced PCS (Figure 7H), suggesting Sgo1 is downstream of CPC  
365 mediated protection of centromeric cohesion. In contrast, forced targeting of INCENP to  
366 centromeres did not rescue Sgo1 depletion induced PCS (Figure 7I), consistent with Aurora-B  
367 being upstream of Sgo1. Finally, targeting INCENP to inner centromeres also did not rescue  
368 hesperidin-induced PCS (Figure 7H), indicating the kinase activity of Aurora-B is required for  
369 protection of centromeric cohesion. These data suggest that R-loops recruit RBMX, which in turn  
370 recruits the CPC to recruit Sgo1 and maintain centromeric cohesion (Figure 7J). In addition, Figure

371 3 and 4 suggest Aurora B also reduces centromeric R-loops, suggesting a self-limiting feedback  
372 loop.

373

## 374 **Discussion**

375 R-loops are emerging as critical regulators of interphase chromatin, but much less is known  
376 about their function in mitosis. Surprisingly, we found that the R-loops were higher in regions of  
377 intermediate chromatin density in prophase cells than interphase cells, suggesting that R-loops are  
378 formed during chromosome condensation. R-loops decline during prometaphase and metaphase  
379 until they reach interphase levels at anaphase. We explored the mechanism that cells use to resolve  
380 mitotic R-loops and found that this process was dependent upon Aurora B kinase activity.  
381 Purification of the CPC from mitotic chromosomes identified 32 proteins that were also found in  
382 purifications of R-loops. We verified that one of these, RBMX, is required to remove mitotic R-  
383 loops. Finally, we explored the function of mitotic R-loops and found they localize the CPC to  
384 centromeres to maintain sister chromatid cohesion.

385 We have established that R-loops form during mitosis in distinct locations from those in  
386 interphase cells and there are active mechanisms to resolve them. In addition, we show that mitotic  
387 R-loops are required for mitotic chromosome cohesion and this is mediated by R-loops recruiting  
388 the CPC to inner centromeres. The CPC is both recruited by R-loops and resolves these R-loops  
389 demonstrating feedback control. In addition to the CPC, we have identified a set of potential  
390 regulators of mitotic R-loops but purifying the CPC from mitotic chromatin. We have confirmed  
391 one of these proteins RBMX is both required to recruit the CPC to inner centromeres and resolve  
392 R-loops. Importantly, loss of RBMX is also required for centromeric cohesion.

393 Our data are consistent with a recent paper that suggested that R-loops exist in mitotic  
394 centromeres where they recruit the ATR kinase to activate centromeric Aurora B (Kabeche et al.,  
395 2018). Our findings support this model and extend it by showing that R-loops are required to  
396 localize Aurora B to inner centromeres. Another study suggested that the phosphorylation of  
397 Histone H3 on Serine 10 is found at R-loops containing chromatin in yeast (Castellano-Pozo et al.,  
398 2013a). Aurora B is the writer of this histone mark, and our finding that Aurora kinase activity is  
399 required to resolve R-loops in human cells suggests that R-loop regulation is a conserved function  
400 of the histone H3 S10 phosphorylation. A previous study also showed R-loop association with H3

401 lysine 9 dimethylation, a marker of condensed chromatin. This is consistent with our  
402 demonstration that R-loops are highest in prophase, when chromosomes condense.

403 We employed DRIP-seq assays to identify the genomic positions of R-loops in populations  
404 of cells arrested in mitosis and the genomic loci of R-loops regulated by Aurora B. Mitotic R-  
405 loops were depleted from gene bodies, but highly enriched at repetitive DNA, most notably alpha-  
406 satellite and SAR sequences. Enrichment at alpha-satellite is consistent with roles of Aurora B in  
407 centromeric regulation and cohesion. SARs were associated with loop regions of chromatin in  
408 older studies (Mirkovitch et al., 1987; Strissel et al., 1996) but their function is still poorly  
409 understood; it is also notable that the genomic loci of SAR repeats are within pericentric DNA  
410 (Hubley et al., 2016). We identified three SAR binding proteins SAF-A, SAF-AL and SAF-B in  
411 purifications of CPC bound to mitotic chromatin. The connection between SARs and the CPC  
412 from two independent unbiased methods suggests this to be an important connection. We speculate  
413 that R-loops and the CPC act at the base of the loops of condensing chromatin. This is supported  
414 by the association of the CPC with condensin and Topo II, which are localized to the base of  
415 chromatin loops in mitotic chromosomes. It is also consistent with a recent study that suggested  
416 that R-loops template the base of chromatin loops of maize centromeres (Liu et al., 2020).

417 The source of mitotic R-loops is a second area of study suggested by our results.  
418 Interestingly, condensin acts at the base of chromosome loops and can generate positive  
419 supercoiling (Bazett-Jones et al., 2002; Kimura and Hirano, 1997; Kimura et al., 1999).  
420 Topoisomerases are known to work with condensin to relieve topological strain (Baxter et al.,  
421 2011), and the activity of topoisomerases could expose single-stranded DNA and allow RNAs to  
422 hybridize, especially within highly repetitive sequences. R-loops have been reported at sites of  
423 negative supercoiling (Stolz et al., 2019), and sites of topoisomerase activity (Drolet et al., 1995;  
424 El Hage et al., 2010). R-loops might also be a result of condensing heterochromatic regions as the  
425 cell moves from interphase to mitosis. H3 phosphorylation on S10 has been shown to displace  
426 Heterochromatin Protein 1 (HP1, Hirota et al., 2005) which binds H3 lysine 9 methylation. We  
427 found that R-loops are highest at the nuclear periphery in prophase cells, and that the largest  
428 proportion of DRIP peaks existed at repetitive sequences which are marked by H3 lysine 9  
429 methylation in interphase.

430 We purified the CPC from mitotic chromatin to gain insight on how it would resolve R-  
431 loops and found a pool of proteins in this proteome that associated with purified R-loops (Cristini

432 et al., 2018). We initially focused on RBMX because it had been shown to regulate cohesion in a  
433 Sgo1-dependent manner (Matsunaga et al., 2012) and our epistasis experiments suggest a pathway  
434 whereby R-loops recruit RBMX to recruit Aurora B to resolve R-loops (Figure 7I). We believe  
435 that our preparation of proteins associated with the CPC on mitotic chromatin and particularly  
436 those that also interact with R-loops will be a rich source of future studies and will help us  
437 understand the precise nature of the generation and resolution of R-loops in mitosis.

438 Our work sheds light on a number of questions associated with mitotic R-loops. First, we  
439 established that there is a specific population of R-loops that arise and are resolved within the  
440 course of mitosis that are distinctly distributed within the genome from interphase R-loops. These  
441 R-loops are preferentially enriched within repetitive sequences, including centric and pericentric  
442 repeats. We have also identified a number of proteins involved with the regulation of mitotic R-  
443 loops, including Aurora B kinase and a number of other chromatin and RNA regulators. Aurora B  
444 kinase has an active role in limiting the formation of repetitive R-loops, and we hypothesize that  
445 this is through phosphorylation of substrates found within the pool of R-loop regulators. Although  
446 R-loops likely have multiple roles in mitosis, we have identified a pathway linking R-loops to  
447 regulation of centromeric cohesion, demonstrating that this regulation is crucial to maintenance of  
448 mitotic fidelity and may provide a mechanism for the increase of lagging chromosomes found in  
449 cells overexpressing RNaseH1 (Kabeche et al., 2018). Overall, this work links R-loops to major  
450 mitotic regulator Aurora B and gives a mechanism for the observation that RNA can regulate  
451 Aurora B and centromeres through *cis*-activity in human cells (Grenfell et al., 2016; Perea-Resa  
452 and Blower, 2017).

453

## 454 **Materials and Methods**

455

456 *Table 1. Antibody table*

| Epitope  | Company        | Catalogue # | Western Blot | Immunofluorescence | ChIP/DRIP |
|----------|----------------|-------------|--------------|--------------------|-----------|
| Flag     | Sigma          | F7425       | 1:10,000     | N/A                | N/A       |
| HA       | Bethyl         | A190-108    | 1:10,000     | N/A                | N/A       |
| Aurora B | Bethyl         | A300-431A   | 1:5,000      | 1:300              | N/A       |
| Survivin | Cell Signaling | 2808        | 1:10,000     | N/A                | N/A       |

|                                  |                                                           |                         |          |         |      |
|----------------------------------|-----------------------------------------------------------|-------------------------|----------|---------|------|
| RBMX                             | Cell Signaling                                            | 14794S                  | 1:1,000  | 1:300   | N/A  |
| Cyclin-B1                        | Santa Cruz                                                | Sc-594                  | 1:1,000  | N/A     | N/A  |
| Sgo1                             | Abcam                                                     | Ab58023                 | 1:1,000  | 1:100   | N/A  |
| Tubulin                          | ATCC Hybridoma                                            | DM1a                    | 1:10,000 | 1:1,000 | N/A  |
| H3 S10-phos                      | Millipore                                                 | 06-570                  | 1:5,000  | 1:1,000 | N/A  |
| SMC3                             | Gift from S Rankin<br>(OK Medical research<br>Foundation) | N/A                     | 1:1,000  | N/A     | N/A  |
| Aurora B<br>(AIM1)               | BD Biosciences                                            | 611082                  | N/A      | 1:200   | N/A  |
| Aurora B                         | Abcam                                                     | ab2254                  | N/A      | 1:200   | N/A  |
| Anti-centromere<br>antigen (ACA) | Antibodies Inc                                            | 15-234-0001             | N/A      | 1:1,000 | N/A  |
| H2ApT120                         | Active Motif                                              | 61195                   | N/A      | 1:1,000 | N/A  |
| CENP-A                           | Abcam                                                     | ab13939-50<br>Clone3-19 | N/A      | 1:1,000 | N/A  |
| H3pT3                            | Millipore                                                 | 07-424                  | N/A      | 1:500   | N/A  |
| Aurora-BpT232                    | Rockland Antibodies<br>and Assays                         | 600-401-677             | N/A      | 1:200   | N/A  |
| Borealin                         | Stukenberg lab                                            | #968                    | N/A      | 1:200   | N/A  |
| Bub1                             | Abcam                                                     | ab54893                 | N/A      | 1:400   | N/A  |
| R-loops                          | ATCC hybridoma                                            | S9.6                    | N/A      | 1:1,000 | 1:10 |
| CENP-T                           | Foltz lab                                                 | N/A                     | N/A      | 1:1,000 | N/A  |
| mCherry                          | abcam                                                     | Ab183628                | 1:1000   | 1:200   | N/A  |
| GFP                              | Stukenberg Lab                                            | #786                    | 1:1000   | N/A     | 1:10 |
| GFP                              | abcam                                                     | 1218                    | 1:1000   | 1:200   | N/A  |

457

458 *Table 2. Chemical and protein inhibitors*

| Inhibitor | Company      | Catalogue # | Concentration<br>HeLa cells | Concentration<br>RPE1 cells | Concentration<br>DLD1 cells |
|-----------|--------------|-------------|-----------------------------|-----------------------------|-----------------------------|
| ZM447439  | Selleck Chem | S1103       | 2 $\mu$ M                   | 4 $\mu$ M                   | 2 $\mu$ M                   |

|            |                    |          |                  |           |                      |
|------------|--------------------|----------|------------------|-----------|----------------------|
| AZD1152    | Cayman<br>Chemical | 13647    | 500 nM           | 1 $\mu$ M | 500 nM               |
| Hesperadin | Selleck Chem       | S1529    | 100-500 nM       | N/A       | N/A                  |
| Colcemid   | Gibco              | 15212012 | 100 ng/ml        | 200 ng/ml | 100 ng/ml            |
| Nocodazole | Sigma              | M1404    | 0.33-3.3 $\mu$ M | N/A       | N/A                  |
| Thymidine  | Sigma              | T1895    | 2 mM             | 4 mM      | N/A                  |
| RNaseH1    | Takara             | 2150B    | N/A              | N/A       | 40 U/ 10 $\mu$ g DNA |

459

460 *Table 3. Oligonucleotides*

| Oligo Name            | Sequence 5'-3'                                 | Use                                         |
|-----------------------|------------------------------------------------|---------------------------------------------|
| RBMX shRNA #1         | ATCAAGAGGATATAGCGAT                            | pGIPZ and pTRIPZ shRNA                      |
| RBMX shRNA #2         | TCGGGTTGGCAGACAAGAA                            | pGIPZ and pTRIPZ shRNA                      |
| Aurora B shRNA        | AGCTGCGCAGAGAGATCGA                            | pGIPZ and pTRIPZ shRNA                      |
| Sgo1 shRNA            | AAGACAACAACAAAATGTT                            | pGIPZ and pTRIPZ shRNA                      |
| Control shRNA         | TCGCTTGGGCGAGAGTAAG                            | pGIPZ and pTRIPZ shRNA                      |
| hRNaseH1-D210N F      | TAAACTGGTTCTGTATACAAACAGTATGTTTA<br>CGATAAATGG | Human RNaseH1 site-<br>directed mutagenesis |
| hRNaseH1-D210N R      | CCATTTATCGTAAACATACTGTTTGTATACAG<br>AACCAGTTTA | Human RNaseH1 site-<br>directed mutagenesis |
| IL-8 F                | GGGCCATCAGTTGCAAATC                            | IL-8 locus ChIP                             |
| IL-8 R                | TTCCTTCCGGTGGTTTCTTC                           | IL-8 locus ChIP                             |
| $\alpha$ -satellite F | AGCCATTTGAGGACAATTGC                           | $\alpha$ -satellite ChIP                    |
| $\alpha$ -satellite R | CCACCTGAAAATGCCACAGC                           | $\alpha$ -satellite ChIP                    |
| DXZ1 F                | CGGGATCACCTTCCCATAAC                           | X-chromosome HOR DRIP                       |
| DXZ1 R                | GGTGTTGCAAACCTGAACTATC                         | X-chromosome HOR DRIP                       |
| H4 F                  | CGACGACCCATTCGAACGTCT                          | rDNA DRIP                                   |
| H4 R                  | CTCTCCCGAATCGAACCTGA                           | rDNA DRIP                                   |

461

462

463 *Cell Culture*

464

465 RPE1-T-REx cells were generated from RPE1-hTERT (ATCC) cells using the T-Rex  
466 system (Thermo Scientific) plasmid by transfection and selecting for stable integration using  
467 Blasticidin. These cells were cultured using DMEM/F12 1:1 (Gibco) supplemented with 10%  
468 (vol/vol) FBS (Gibco), penicillin and streptomycin. HeLa-FRT-T-REx cells were generated using  
469 the Flp-in T-REx system (Thermo Scientific) and were a gift from the Dan Foltz lab. HEK-293T  
470 cells (ATCC) and HeLa-FRT-T-REx cells were cultured in DMEM (Gibco) supplemented with  
471 10% (vol/vol) FBS, penicillin and streptomycin. DLD1 cells were a gift from the Michael Guertin  
472 lab, and were cultured in RPMI (Gibco) media supplemented with 10% (vol/vol) FBS, penicillin  
473 and streptomycin. All cells were grown in a humidified chamber at 37 °C in the presence of 5%  
474 CO<sub>2</sub>.

475

#### 476 *Stable cell lines generation*

477 HeLa-T-REx-RNaseH1 and RNaseH1<sup>D10R, E48R</sup> (2R) were created by transfecting pICE-  
478 RNaseH1-WT-NLS-mCherry and pICE-RNaseH1-D10R-E48R-NLS-mCherry (a gift from  
479 Patrick Calsou, Addgene plasmids #60365 and #60367 Britton et al., 2014) using Lipofectomine  
480 2000 (Invitrogen) and selecting using 1 µg/ml Puromycin for 2 weeks. Clonal lines were created  
481 by plating at very low density and selecting 30 colonies of each and selecting for colonies that  
482 were mCherry negative in absence of doxycycline and induced detectable fluorescence within 4  
483 hours of addition of 1 µg/ml doxycycline.

484 The LAP tag from pIC113 vector (Cheeseman and Desai, 2005) was subcloned into  
485 pcDNA5.0/FRT vector (Invitrogen) to make the pcDNA5.0/FRT-LAP-N vector. Full length  
486 cDNAs of Aurora-B, Borealin, and Survivin were cloned into pcDNA5.0/FRT-LAP-N vector to  
487 make LAP-Aurora-B, LAP-Borealin and LAP-Survivin constructs respectively. These LAP  
488 tagged constructs were co-transfected with pOG44 (Invitrogen) into Flp-In HeLa T-REx cells. Stable  
489 lines expressing these constructs were created by selection with hygromycin (200µg/ml,  
490 Invitrogen) for two weeks.

491 Full-length cDNAs of Aurora-B, Borealin, INCENP and Survivin were cloned into  
492 pcDNA3.0-HA vector to make HA-tagged Aurora-B, Borealin, INCENP and Survivin  
493 respectively. DLAP and DHA destination vectors were made based on pcDNA5.0/FRT-LAP-N  
494 and pcDNA3.0- HA vectors respectively. The cDNA of RBMX were obtained from the human



495 ORFeome collection (V5.1) and was cloned into DLAP and DHA destination vectors using  
496 gateway cloning technology (Invitrogen) to make LAP-RBMX and HA-RBMX. The LAP tag from  
497 pIC113 vector (Cheeseman and Desai, 2005) was subcloned into pcDNA5.0/FRT/TO vector  
498 (Invitrogen) to make the pcDNA5.0/FRT/TO-LAP-N vector. CB-INCENP-GFP vector is a kind  
499 gift from M.A Lampson (Liu et al., 2009). We amplified CENP-B 1-158 (CB) by PCR and clone  
500 it into pcDNA5.0/FRT/TO-LAP-N vector using Not I and BamH I sites, which removes sequence  
501 encoding S peptide and leaves GFP sequence intact. This generated pcDNA5.0/FRT/TO -CB-GFP  
502 vector (CB-GFP). The full length cDNA sequence of Sgo1 and the cDNA sequence encoding  
503 INCENP aa47-aa917 were cloned into pcDNA5.0/FRT/TO-CB-GFP vector to generate the  
504 pcDNA5.0/FRT/TO-CB-GFP-Sgo1 (CB-Sgo1) and pcDNA5.0/FRT/TO-CB-GFP-INCENP 47-  
505 917 (CB-INCENP). The stable lines constitutively expressing LAP-RBMX or inducibly  
506 expressing CB-GFP, CB-Sgo1 or CB-INCENP were made by co-transfecting these constructs with  
507 pOG44 (Invitrogen) into Flp-In HeLa T-REx cells and selection with hygromycin (200µg/ml,  
508 Invitrogen) for two weeks.

509 The human lentiviral shRNAmir pGIPZ constructs were obtained from Open Biosystems  
510 and grown and purified according to their protocol. The targeting sequences of the shRNAs used  
511 in this study are listed in Table 3. To package virus,  $1.5 \times 10^7$  HEK-293T cells were co-transfected  
512 with 18 µg pGIPZ plasmid, 6 µg pMD2G plasmid, and 12 µg psPAX2 plasmid. Medium were  
513 replenished 24 hours after transfection and supernatants containing virus were collected and  
514 filtered through 0.2µm filters 48 hours after transfection. Cells were infected with virus in the  
515 presence of 8µg/ml polybrene (Sigma).

516 To create RPE1-T-REx EGFP, EGFP-RNaseH1, and EGFP-RNaseH1<sup>D201N</sup> cells, EGFP-  
517 hRNaseH1 or EGFP alone was cloned into pDONR-221 via Gateway cloning (Invitrogen) and  
518 then recombined into pLX-304 (Gift from David Root, Addgene plasmid # 25890 Yang et al.,  
519 2011). Site-directed mutagenesis on pDONR221-EGFP-hRNaseH1 using primers in Table 3 and  
520 then recombined into pLX-304. Virus was packaged as above. Double thymidine synchronized  
521 cells were infected with viral supernatant without polybrene upon release from the first thymidine  
522 stall and again upon second thymidine stall to achieve 100% infection and expression in the cell  
523 cycle following second thymidine release.

524

525 *Immunoblotting and immunoprecipitation*

526 For immunoprecipitation, HEK-293T Cells were co-transfected with plasmids encoding HA-  
527 tagged -Aurora-B, -Borealin, -INCENP, -Survivin and Flag-tagged, -RBMX. Forty-eight hours  
528 after transfection, cells were synchronized to mitosis with 100ng/ml colcemid for 16 hours. Cells  
529 were lysed in lysis buffer (250mM NaCl, 50mM Tris-HCl, 5mM EDTA, 0.5% NP-40, 1 mM DTT,  
530 20mM Beta-glycerophosphate, 50mM NaF, 1mM Sodium orthovanadate, 1x protease inhibitors  
531 cocktail (Roche) and sonicated with cell disruptor for 30 cycles with 30 seconds on and 30 seconds  
532 off at 4 °C. The whole cell extracts were cleared by centrifugation at 16000g for 20 minutes and  
533 the supernatants were subjected to immunoprecipitation with EZView anti-flag beads (Sigma) for  
534 4 hours at 4 °C. The beads were washed three times with lysis buffer. The bound proteins were  
535 resolved on 6-18% SDS-PAGE gel and blotted with antibodies as indicated.

536

### 537 *Immunofluorescence microscopy*

538 HeLa T-REx cells were seeded onto coverslips coated with poly-L-Lysine (Sigma) one day before  
539 staining. The cells were co-fixed with 2% paraformaldehyde, PHEM buffer (60 mM Pipes, 25 mM  
540 Hepes, 10 mM EGTA, and 4 mM MgCl<sub>2</sub>, pH 6.9), and 0.5% Triton-X 100 for 20 minutes at room  
541 temperature. Cells stained with RBMX were pre-extracted with 0.5% Triton-X 100 for 2 minutes  
542 prior to fixation as above. After washing with PBS for three times, cells were blocked with 1%  
543 BSA for 30 minutes. Immunostaining was performed with primary antibodies (Table 1) at the  
544 indicated dilution for 1 hour at room temperature. After washing three times with PBS, cells were  
545 incubated with fluorescent secondary antibodies (Jackson ImmunoResearch). After washing two  
546 times with PBS, the cells were counterstained with 0.5µg/ml DAPI for 5 minutes. After two more  
547 washes with PBS, the coverslips were mounted onto slides using ProlongGold Antifade  
548 (Invitrogen) and sealed with nail polish. Image acquisition was performed as described previously  
549 (Banerjee et al., 2014), or on a Zeiss 880 confocal microscope in the UVA Advanced Microscopy  
550 Facility (Figure 1). Images were processed and analyzed using Volocity (V6.3, PerkinElmer). To  
551 quantify fluorescence levels at centromeres, we used a volume thresholding algorithm to mark all  
552 centromeres on the basis of ACA or CENP-A staining in projected images. To eliminate the size  
553 difference of each marked centromere, the sum of the fluorescence intensity was divided by the  
554 voxel volume to obtain the value of fluorescence intensity per volume. To quantify fluorescence  
555 over chromatin, a volume thresholding algorithm was applied to the DAPI signal and volume  
556 normalized. After background subtraction, we calculated the intensity/volume values for each

557 channel. These values were normalized against the corresponding ACA or CENP-A  
558 intensity/volume. When cells were not stained with a centromere marker (ACA or CENP-A), we  
559 marked centromeres based on Bub1, Aurora-B or Sgo1 staining using a volume thresholding  
560 algorithm. These values were plotted using Prism (GraphPad) and the statistical significance was  
561 determined by the appropriate statistical test for the data, defined by normality and number of  
562 comparisons. For Box-and whisker plots, central lines indicate medians and whiskers are from  
563 minimum to maximum (range 0-100 percentile). For PCS assay, chromosome spreads were  
564 performed where cells were treated with 100ng ml<sup>-1</sup> colcemid were trypsinized, harvested and  
565 swelled in 75 mM KCl for 10-15min at 37 °C. Subsequently, Cells were fixed with freshly made  
566 Carnoy's solution (75% methanol, 25% acetic acid) on ice for 30 minutes. After washing with the  
567 fixative four times, cells were dropped onto glass slides and dried at room temperature. Slides were  
568 stained with DAPI washed briefly with PBS. For spreading HeLa cells expressing LAP-CENP-A  
569 and HeLa cells expressing RNaseH1/RNaseH1-2R, mitotic cells were obtained by mitotic shake-  
570 off and swelled in hypotonic buffer (75 mM KCl:0.8% NaCitrate:H<sub>2</sub>O at 1:1:1) with protease  
571 inhibitor cocktail (Roche) at room temperature for 10-15 min. Cells were spun to slides by  
572 Cytospin at 1500rpm for 5 min. The chromosome spreads were fixed with 2% PFA/PBS at room  
573 temperature for 20 min, then stained using the above protocol and indicated antibody  
574 concentrations. After washing with PBS, DNA was counterstained with DAPI.

575

#### 576 *ChIP*

577 Chip analysis was performed as previously described. Briefly, cellular proteins and DNA were  
578 cross-linked by adding formaldehyde to the growth media to a final concentration of 0.1%. Cells  
579 were harvested in ice-cold phosphate-buffered saline and lysed with SDS buffer (50 mM Tris, 10  
580 mM EDTA, and 1% w/v SDS). Lysates were sonicated utilizing a Branson sonifier 250 (Branson  
581 Ultrasonics, Danbury,CT) and precleared with salmon sperm DNA/protein A-agarose (Upstate  
582 Biotechnologies, Lake Placid, NY). Lysates were then tumbled overnight at 4 °C with salmon  
583 sperm DNA/protein A-agarose with anti-GFP or rabbit IgG antibodies. Complexes were  
584 precipitated and serially washed three times each with low salt (20 mM Tris, 150 mM NaCl, 2 mM  
585 EDTA, 0.1% (w/v) SDS, and 1% (v/v) Triton X-100); high salt (20 mM Tris, 500mM NaCl, 2 mM  
586 EDTA, 01% (w/v) SDS, and 1% (v/v) Triton X-100); LiCl wash (10 mM Tris, 250 mM LiCl, 1  
587 mM EDTA,1%(w/v) deoxycholate, and 1% (v/v) Nonidet P-40); and TE buffer (20 mM Tris and

588 2 mM EDTA). Washed complexes were eluted with freshly prepared elution buffer (1% SDS and  
589 100 mM NaHCO<sub>3</sub>), and the Na<sup>+</sup> concentration was adjusted to 200 mM by adding NaCl followed  
590 by incubation at 37 °C to reverse protein/DNA cross-links. DNA was purified utilizing a PCR  
591 purification kit (Qiagen). Purified DNA was then amplified across the il8 locus region or  
592 centromeric  $\alpha$ -satellite DNA on chromosome 7, primers available in Table 3.

593

#### 594 *Proximity ligation assay (PLA)*

595 PLA was performed as described (Banerjee et al., 2014).

596

#### 597 *DRIP/DRIP-seq*

598 DLD1 cells were arrested in colcemid for 24 hours and then treated with either DMSO, AZD-1152  
599 or ZM-447439 at the indicated concentrations (Table 2) for 1 hour. Mitotic shakeoffs were  
600 performed to gain a mitotic population. DRIP assays were performed as in Halász et al., 2017.  
601 Briefly, cells were fixed using 1% Formaldehyde for 10 minutes, then quenched with Glycine to a  
602 final concentration of 0.5 M at room temperature. Cells were collected, washed twice with PBS,  
603 resuspended in lysis buffer (50 mM HEPES-KOH, pH 7.5, 140 mM NaCl, 1 mM EDTA, 1%  
604 Triton X-100, 0.1% Na-Deoxycholate, 1% SDS), 1 mL per 10<sup>7</sup> cells, lysed by being passed through  
605 a 20G needle 10 times, and sonicated 15 cycles of 30s on, 30s off, High setting, Bioruptor. This  
606 yielded an average of 300 bp fragment. Sonicated chromatin was digested with Proteinase K to 1  
607  $\mu$ g/ml at 65 °C overnight to remove proteins and crosslinks. DNA was precipitated using 1/10  
608 volume 3 M Na-acetate and 1 volume isopropanol and incubated for 1 hour at -80 °C. The DNA  
609 pellet was washed, dried, and resuspended in 100  $\mu$ l 5 mM Tris-HCl pH 8.5. 12  $\mu$ g of the resulting  
610 DNA was incubated with RNaseH1 buffer +/- RNaseH1 (40 units, Takara) overnight at 37 °C,  
611 then 10  $\mu$ g of the reaction was incubated with 5  $\mu$ g of S9.6 hybridoma antibody overnight in IP  
612 buffer (50 mM HEPES-KOH pH 7.5, 140 mM NaCl, 5 mM EDTA, 1% Triton X-100, 0.1% Na-  
613 Deoxycholate), rotating at 4 °C. 25  $\mu$ l pre-blocked Dynabeads Protein A (Thermo Fisher, blocked  
614 for 1 hour in PBS/EDTA with 0.5% BSA) were added to the immunoprecipitation and rotated for  
615 4 hours at 4 °C. Beads were recovered and washed successively for 30 mins at room temperature  
616 each: 2 washes of 1 ml low salt buffer (50 mM HEPES-KOH pH 7.5, 140 mM NaCl, 5 mM EDTA,  
617 1% Triton X-100, 0.1% Na-Deoxycholate), 2 washes of 1 ml high salt buffer (50 mM HEPES-

618 KOH pH 7.5, 500 mM NaCl, 5 mM EDTA, 1% Triton X-100, 0.1% Na-Deoxycholate), 2 washes  
619 of 1 ml LiCl wash buffer (10 mM Tris-HCl pH 8, 250 mM LiCl, 1 mM EDTA, 1% Triton X-100,  
620 0.1% Na-Deoxycholate, 0.5% NP-40), and 2 washes of 1 ml TE buffer (10 mM Tris-HCl pH 8, 10  
621 mM EDTA). Elution was performed in 100  $\mu$ l elution buffer (50 mM Tris-HCl pH 8, 10 mM  
622 EDTA, 1% SDS) for 15 minutes at 65 °C, vortexing every 5 minutes. Resulting supernatant DNA  
623 was purified using a PCR clean-up kit (Invitrogen), along with 1  $\mu$ g starting DNA from the  
624 RNaseH1 reaction. The recovered DNA was analyzed by quantitative real-time PCR using  
625 LunaScript qPCR mastermix (NEB) and the ABI StepOnePlus qPCR machine and primers in  
626 Table 3. 45 ng of precipitated DNA spiked with 5 ng of fragmented genomic DNA from *S.*  
627 *cerevisiae* (strain MT11, a gift from the David Auble) was used as starting material for the Takara  
628 SMARTer ThruPLEX DNA-seq Kit and DNA HT Dual Index Kit. Libraries were sequenced using  
629 the Illumina NextSeq 500 at the UVA Genome Analysis and Technology Core using 12-plex  
630 multiplexing, mid output 150 round paired end sequencing, resulting in greater than 10M reads  
631 per sample.

632

### 633 *Bioinformatic Analysis*

634 HEK293 reads were obtained from the European Nucleotide Archive (ENA) under  
635 accession number GSE68953 for the study (Nadel et al., 2015). These reads were processed  
636 identically to the reads derived in this study. Reads were quality thresholded using PRINSEQ  
637 (Minimum mean quality = 15, minimum quality to trim = 20, minimum length to drop = 100,  
638 maximal N percentage = 2) and subsampled to 6.5M reads using seqtk. Sequences were first  
639 aligned to SacCer3 genome using BWA-MEM (Li and Durbin, 2009) to determine spike  
640 percentage (HEK293 reads used as background alignment for sequence conservation) in order to  
641 determine a scaling factor according to library preparation efficiency. These values are listed  
642 below in Table 4. Due to an error in de-multiplexing, R2 file of ZM sample had to be reverse  
643 complemented to generate FR oriented pairs. Reads were aligned to the human genome (hg38)  
644 using BWA-MEM. Given that we expected to observe repetitive sequences in our samples, we  
645 did not use repeat-masking but required only one alignment per read pair. Peaks were called  
646 using MACS2 (Feng et al., 2012; Zhang et al., 2008), with replicate samples used to refine peaks  
647 common to both replicates (FDR 1%, ZM and AZD were considered replicates in this case). Tag  
648 Directories were created using Homer makeTagDirectory (Heinz et al., 2010) and were used to

649 generate enrichment graphs using annotatePeak (Heinz et al., 2010) using the peak profile  
650 setting. Homer peak annotation was used to generate genome ontology graphs. The most recent  
651 GENCODE version (v32, Frankish et al., 2019) was used for annotation of gene bodies,  
652 transcription start sites (TSS) and transcription termination sites (TTS). RepeatExplorer Galaxy  
653 instance (Novák et al., 2013) was used to generate *de novo* repeat clusters using compiled input  
654 files. The subsampled files were then aligned to the contigs generated using a BLAST-N  
655 similarity search (Neumann et al., 2012) to gain a count table, which was then normalized, scaled  
656 and repeat experiments were averaged. HOR specific K-mers were obtained from the  
657 supplemental information in Miga, 2017. Kmer counts were obtained using the KAT sect  
658 function (Mapleson et al., 2017).

659

660 *Table 4. Spike in quantification*

| Sample       | Reads Mapped and Paired | Corrected | Scaling factor |
|--------------|-------------------------|-----------|----------------|
| Input 1      | 2.94M                   | 2.84M     | 0.211          |
| Input 2      | 2.15M                   | 2.05M     | 0.293          |
| HEK293 Input | 0.10M                   | 0         | 0.9*           |
| DMSO 1       | 3.75M                   | 3.48M     | 0.172          |
| DMSO 2       | 1.32M                   | 1.05M     | 0.571          |
| AZD          | 2.07M                   | 1.80M     | 0.333          |
| ZM           | 1.25M                   | 0.98M     | 0.612          |
| DMSO-RNH1 1  | 4.63M                   | 4.36M     | 0.138          |
| DMSO-RNH1 2  | 5.52M                   | 5.25M     | 0.114          |
| HEK293 DRIP  | 0.27M                   | 0         | 0.9*           |

661 \*Assumed complete efficiency with library preparation

662

#### 663 *Purification of mitotic chromatin and MNase digestion*

664 Either LAP, LAP-Aurora B, LAP-Survivin or LAP-Borealin expressing HeLa cells  
665 (3x10<sup>9</sup>) were arrested with colcemid for 16-18 hours were harvested and mitotic chromosomes  
666 were purified as described (Paulson, 1982). Mitotic chromosomes were resuspended in 40ml  
667 MNase buffer (20mM HEPES, pH7.7; 20mM KCl; 5mM  $\beta$ -mercaptoethanol; 1xProtease



668 Inhibitors cocktail (EDTA free, Roche), 20mM  $\beta$ -glycerophosphate, 1mM Sodium orthovanadate,  
669 3mM CaCl<sub>2</sub>, 250 mM NaCl , and 0.1% Digitonin) and digested with MNase (Roche, 150u ml-1)  
670 for 1 hour at room temperature. After digestion extracts were supplemented with 50 mM NaF and  
671 clarified by centrifugation at 12,000g for 20 minutes at 4°C. The supernatants were used as starting  
672 materials for LAP purifications that are described in the Figure 1–figure supplement 1.

673

#### 674 *Multidimensional Protein Identification Technology (MudPIT)*

675 The elutes from LAP purifications were digested in solution using trypsin. The digested  
676 samples were pressure-loaded onto a fused silica capillary desalting column containing 5 cm of 5  
677  $\mu$ m Polaris C18-A material (Metachem, Ventura, CA) packed into a 250- $\mu$ m i.d. capillary with a  
678 2  $\mu$ m filtered union (UpChurch Scientific, Oak Harbor, WA). The desalting column was washed  
679 with buffer containing 95% water, 5% acetonitrile, and 0.1% formic acid. After desalting, a 100  
680  $\mu$ m i.d capillary with a 5- $\mu$ m pulled tip packed with 10 cm 3  $\mu$ m Aqua C18 material (Phenomenex,  
681 Ventura, CA) followed by 3 cm 5- $\mu$ m Partisphere strong cation exchanger (Whatman, Clifton, NJ)  
682 was attached to the filter union and the entire split-column (desalting column–filter union–  
683 analytical column) was placed in line with an Agilent 1100 quaternary HPLC (Palo Alto, CA) and  
684 analyzed using a modified 12-step separation described previously (Washburn et al., 2001). As  
685 peptides eluted from the microcapillary column, they were electrosprayed directly into an LTQ 2-  
686 dimensional ion trap mass spectrometer (ThermoFinnigan, Palo Alto, CA) with the application of  
687 a distal 2.4 kV spray voltage. A cycle of one full-scan mass spectrum (400-1400 m/z) followed by  
688 8 data-dependent MS/MS spectra at a 35% normalized collision energy was repeated continuously  
689 throughout each step of the multidimensional separation. Application of mass spectrometer scan  
690 functions and HPLC solvent gradients were controlled by the Xcalibur datasystem. MS/MS spectra  
691 were analyzed using the following software analysis protocol. Poor quality spectra were removed  
692 from the dataset using an automated spectral quality assessment algorithm (Bern et al., 2004).  
693 MS/MS spectra remaining after filtering were searched with the SEQUEST™ algorithm (Eng et  
694 al., 1994) against the current version of NCBI Homo sapiens database concatenated to a decoy  
695 database in which the sequence for each entry in the original database was reversed (Peng et al.,  
696 2003). SEQUEST results were assembled and filtered using the DTASelect (version 2.0) program.

697

#### 698 *Statistical Tests*



699 All statistical tests were run with the assistance of the Graphpad Prism software. First,  
700 statistical outliers were determined and mathematically eliminated using the ROUT method, with  
701 Q value of 1%. For all measurements, descriptive statistics were then used to determine whether  
702 the data conformed to a normal distribution. For the data in which all samples passed a D'Agostino  
703 and Pearson test (K2 value measured), data were considered to be normally distributed and a  
704 parametric test was applied. These parametric tests were either a student's t-test for comparisons  
705 between two samples with similar standard deviations, or Welch's t-test for comparisons between  
706 samples with at least 2-fold differing standard deviations, or a one-way ANOVA for comparison  
707 of multiple samples. In the case of ANOVA, Dunnet correction for multiple comparison was  
708 utilized, and a q statistic was measured for each difference. If at least one sample in a dataset  
709 involved non-normally distributed data, non-parametric tests were applied. For comparison  
710 between two samples, Mann-Whitney tests were used to compare the ranks of individual data  
711 points within the total distribution, a Mann-Whitney U value was collected, and a two-tailed p-  
712 value was determined. For comparison of multiple unpaired samples, a Kruskal-Wallis test was  
713 performed to compare ranks of individual data points within the total distribution. Dunn's  
714 correction for multiple comparisons was performed on post-test statistics, and Z statistics were  
715 used to determine approximate p-values. Two-sided p-values were always determined unless  
716 stated within figure legends. If measurements could not be taken for each comparison directly,  
717 multiple comparison corrections were applied. Figures show means and ranges of data if normally  
718 distributed, medians and ranges of data if not normally distributed.

719

720

## 721 **Figure Legends**

722 Figure 1. Aurora B is responsible for removing R-loops from Centromeric Satellite Repeats. DRIP-  
723 seq analysis of mitotic DLD1 cells, stalled in mitosis and treated with vehicle (DMSO), 500 nM  
724 AZD-1152, or 2  $\mu$ M ZM-447439 for the last hour of the arrest, compared with asynchronous  
725 DRIP-seq from HEK293 cells published in (Nadel et al., 2015). A. Example track of peaks called  
726 in vehicle sequence samples, compared with paired RNaseH1-treated samples; replicate data  
727 compiled in each. Two DRIP-seq samples per track, measured across 96,139 loci. B. Enrichment  
728 of reads at peak loci called in vehicle samples (left, 96,139 loci) or Aurora B inhibited samples  
729 (right, 89,803 loci) with replicate data compiled. C. Genomic annotation of all peaks called by the

730 same pipeline in asynchronous cells (28,573 loci), vehicle treatment (96,139 loci), and Aurora B  
731 inhibited (89,803 loci). D-E. Enrichment of reads across gene bodies, scaled to be a proportion of  
732 the gene length in D, and as measured near transcriptional termination sites (TTS) in E. Genes  
733 were identified via GENCODE v32. Yellow, Asynchronous cells, Red, Mitotic DMSO treated  
734 cells, Green, Mitotic Aurora B inhibited cells. F-G. Analysis of enrichment of reads from Repeat  
735 Explorer clusters, after filtering those clusters which had insufficient read counts and those with  
736 less than 2-fold enrichment relative to RNaseH1 treated samples. 100 clusters analyzed, 38  
737 remained after filtering. Grey lines in F represent 2-fold enrichment. G. Analysis of clusters  
738 identified as ALR, 3 clusters measured over 2 DRIP-seq samples; plot shows individual  
739 measurements and mean values. H-I. Relative enrichment analysis of higher order repeat specific  
740 K-mers derived from Miga, 2017; 2119 measured in all. H. Individual k-mer enrichment log 10-  
741 fold changes in mitotic cells vs asynchronous cells on the x axis, Aurora B inhibited mitotic cells  
742 vs DMSO mitotic cells on the y axis, individual HORs in different colors. Grey lines, 2-fold  
743 enrichment lines. I. Distribution of counts of the total k-mer array, points show individual  
744 measurements and line represents the mean values. \*\*\*\*,  $p < 0.0001$ , calculated by one-way  
745 ANOVA.

746  
747 Figure 2. Mitotic R-loops are dynamic and associated with the nuclear periphery during prophase.  
748 A. Representative images from randomly cycling RPE1-T-REx cells after indirect  
749 immunofluorescence using antibodies against the human centromere (ACA), and R-loops  
750 (hybridoma S9.6). Images from one of 5 independent experiments. Scale bar, 7  $\mu\text{m}$ . B-C.  
751 Quantification of S9.6 signal intensity overlapping with ACA (B) and DAPI with the ACA area  
752 subtracted (C), divided into interphase and 4 mitotic subsets, prophase, prometaphase, metaphase,  
753 and anaphase with 29, 50, 78, 38, and 46 cells measured respectively. Significance values are  
754 located in Figure 1—Figure supplement 1C, achieved by Kruskal-Wallis non-parametric ANOVA  
755 with post-test. D. Confocal microscopy images of a prophase nucleus. Arrowheads show where  
756 the line scan crosses the nuclear periphery. E. Left panel, relative intensity profile of line scan  
757 outlined in D. Right panel, 10 individual line scans from different prophase nuclei, scaled and  
758 overlaid. F. Scatter plots of intensity correlation between S9.6 and DAPI for a total of 3 nuclei at  
759 each phase, thresholded at 3000 a.u. and 5000 a.u. for S9.6 and DAPI respectively where S9.6  
760 points were selected by the brightest points in a 0.1  $\mu\text{m}$  3-D rolling circle. S9.6 intensity was then

761 subset into low, medium and high (tan, pink, and maroon). Maroon dots are quantified for the  
762 distribution of DAPI intensities in G. Significance values achieved by one-way parametric  
763 ANOVA with post-test. Interphase: n=117; Prophase: n=137; Prometaphase: n=42 puncta.

764  
765 Figure 3. Aurora B activity promotes R-loop resolution in mitosis. A. Representative images of  
766 RPE1-T-REx cells treated with vehicle (DMSO), 500 nM AZD-1152, or 4  $\mu$ M ZM-447439 for 1  
767 hour. Images are from one of 4 experiments, quantified in B and C as the signal of S9.6 indirect  
768 immunofluorescence overlapping with signal of ACA (Centromeric R-loops, B) or DAPI  
769 (Chromatin R-loops, C), normalized to ACA signal. Kruskal-Wallis non-parametric ANOVA  
770 significance test performed to estimate a p-value. Interphase DMSO: n=27 cells; Interphase AZD:  
771 n=25 cells; Interphase ZM: n=28 cells; Mitotic DMSO: n=97 cells; Mitotic AZD: n=26 cells;  
772 Mitotic ZM: n=51 cells. D. ACA values were compared across samples to justify normalization  
773 to ACA, no significant differences were detected by Kruskal-Wallis ANOVA. E-F. DRIP-qPCR  
774 results from 3 independent experiments from DLD1 cells arrested in mitosis and treated with  
775 vehicle (DMSO), 500 nM AZD-1152, or 2  $\mu$ M ZM-447439 for the last hour of the arrest. DXZ1  
776 locus, X-chromosome primary  $\alpha$ -satellite higher-order repeat array; rDNA assayed at 4 kb into the  
777 rDNA repeat.

778  
779 Figure 4. R-loop presence is necessary to localize Aurora B. A. Expression of a tet-inducible  
780 mCherry-RNaseH1 from *E.coli* and a catalytically dead mutant with point mutations D10R, E48R  
781 (2R) was induced within randomly cycling HeLa-T-REx cells and indirect immunofluorescence  
782 for Aurora B was assayed. Aurora B intensity normalized to DAPI intensity was quantified in B,  
783 with 10 cells measured in each; mean values and range are shown. Significance was determined  
784 by one-way ANOVA compared to WT cells. C-F. RPE1-T-REx cells infected with a constitutive  
785 EGFP or EGFP-hRNaseH1 construct, within a double thymidine block and release to allow for  
786 peak expression during the first mitosis. Cells were then subjected to indirect immunofluorescence  
787 for H2ApT120 and ACA (E-F), or H3pT3 and ACA (G-H). Signal of the histone mark normalized  
788 to ACA quantified in F and H, shown as median and range values. Significance values dictated by  
789 Mann-Whitney non-parametric tests.

790

791 Figure 5. RBMX associates with the CPC and R-loops. A. MudPiT analysis of LAP-tagged Aurora  
792 B, Borealin, and Survivin precipitation many of the same peptides, not observed in the background  
793 LAP only precipitation. B. DAVID GO keywords of all proteins precipitated in A, top three are  
794 phosphoprotein, ribonucleoprotein, and RNA-binding protein. Light blue, negative log p-value as  
795 identified by DAVID; purple, number of proteins associated with each keyword; green, proportion  
796 of the total proteins associated with each keyword that also appears in the R-loop interactome  
797 published by (citation). C. Co-immunoprecipitation of tagged proteins from HEK293T cells. Flag-  
798 tagged RBMX or Flag alone was co-expressed with HA-tagged CPC members, and all four CPC  
799 members can be observed to be co-immunoprecipitated with RBMX specifically. D. Co-  
800 immunoprecipitation of endogenous protein from HeLa-T-REx cells. Immunoprecipitation of  
801 endogenous Aurora B, Borealin, and RBMX but not non-specific IgG can be observed to  
802 precipitate RBMX and Aurora B. E. Indirect immunofluorescence after extraction of unbound  
803 proteins prior to fixation in RPE1-T-REx cells shows RBMX localization to the centromere, as  
804 marked by ACA. Scale bar, 1.6  $\mu$ m. F. Degradation of R-loops by overexpression of EGFP-  
805 hRNaseH1 in RPE1-T-REx cells leads to loss of RBMX bound to chromatin. Representative  
806 images of prometaphase cells in the left panel. F' Quantification of chromatin bound RBMX in  
807 mitotic cells, expressed as a proportion of measured nearby interphase cells as the maximal  
808 proportion of RBMX protein that could remain bound to chromatin, which is shown in the right  
809 panel. Graphs show mean and range values for the 15 mitotic and 15 paired interphase cells, P-  
810 value calculated by unpaired two-tailed t-test. G. ChIP-qPCR of LAP, LAP-RBMX, or YFP-  
811 CENP-A to the  $\alpha$ -satellite array of chromosome 7 or control locus II8. Values are expressed as  
812 fold enrichment of IgG control IP from the same cells at the same locus. Graph shows the results  
813 of 2 ChIP experiments. H. Proximity ligation assay (PLA) of endogenous RBMX and Survivin  
814 from HeLa-T-REx cells. Borealin indirect immunofluorescence was also performed as a  
815 localization control for the CPC.

816  
817 Figure 6. RBMX is necessary to resolve R-loops and localize Aurora B. A-B. shRNA knockdown  
818 of RBMX in RPE1-T-REx cells results in loss of Aurora B localization, as well as an increase in  
819 prevalence of S9.6 immunofluorescence signal. A. Representative images from one of 3  
820 experiments, quantified in B, of the loss of Aurora B immunofluorescence intensity and gain of  
821 S9.6 fluorescence intensity. Graphs in B show median and range values for normalized

822 fluorescence intensity, n=22 cells and 15 cells respectively. P-values estimated by Mann-Whitney  
823 non-parametric tests. C-E. loss of Aurora B after shRNA knockdown of RBMX in HeLa-T-REx  
824 cells can be rescued by expression of LAP-RBMX. C. Representative images of  
825 immunofluorescence of Aurora B and CENP-T from 2 experiments. D. Quantification of  
826 centromeric Aurora B, normalized to CENP-T immunofluorescence signal. P-value determined by  
827 one-way ANOVA, n=17, 12, 18 respectively. E. Western blot showing RBMX expression after  
828 shRNA knockdown and re-expression of LAP-RBMX.

829  
830 Figure 7. R-loops and RBMX recruit Aurora B to recruit Sgo1 and maintain centromeric cohesion.  
831 A. Representative images of normal spreads and cells with premature chromatid separation (PCS).  
832 B. Quantification of percent PCS in HeLa-T-REx cells overexpressing *E. coli* RNaseH1 or  
833 catalytically dead RNaseH1-2R mutant from 4 replicate experiments, with 10 fields imaged from  
834 each cell type in each experiment. C. Quantification of percent PCS in HeLa-T-REx cells  
835 expressing shRNAs that are either non-targeting (shCtrl) or against RBMX and a tet-inducible  
836 CENP-B DNA binding domain fused to INCENP. 3 replicate experiments. D. RPE1-T-REx cells  
837 overexpressing GFP-hRNaseH1 or GFP empty vector, stained using indirect immunofluorescence  
838 for Sgo1 and ACA. Quantified in E, p-value determined by unpaired two-tailed t-test. F. Cells in  
839 C stained for immunofluorescence of Sgo1 and Aurora B. Quantified in G for Sgo1 (top) and  
840 Aurora B (bottom) intensity, normalized to the level of fluorescence in control shRNA cells  
841 without CENP-B-INCENP construct expression. P-values determined by one-way ANOVA. H.  
842 PCS assay for HeLa-T-REx cells expressing CENP-B DNA binding domain fused with GFP,  
843 Sgo1, or INCENP and either treated with vehicle (DMSO), or Aurora B inhibitor Hesperadin at  
844 100 nM with MG132 to prevent escape from mitotic arrest. 3 replicate experiments. I. PCS assay  
845 for HeLa-T-REx cells expressing non-targeting shCtrl or shSgo1, and CENP-B DNA binding  
846 domain fused to either GFP or INCENP. 3 replicate experiments. J. Western blot for cells  
847 expressing non-targeting shCtrl or shSgo1 and blotted for Sgo1. K. Schematic representation of  
848 the results of the epistatic experiments presented in this work.

849  
850 Supplemental Figure 1. R-loops are associated with condensing chromatin. A. Total chromatin  
851 intensities of R-loops, quantified by total S9.6 signal over the DAPI stained region, normalized to  
852 DAPI. B. Additional images of prophase nuclei with additional line scan tracks from figure 1E

853 demarcated. Scale bars, 13  $\mu$ m. C. Significance values of S9.6 quantifications from Kruskal-Wallis  
854 non-parametric ANOVAs with post-test to estimate approximate p-values, given that data in all  
855 cases failed multiple normality tests. Black boxes,  $p < 0.0001$ ; all other values listed within the  
856 heatmaps.

857  
858 Supplemental Figure 2. RNaseH1 overexpression controls R-loop prevalence, Aurora B activation.  
859 A. Western blot showing induction of mCherry-RNaseH1 constructs after 8 hours of doxycycline  
860 addition. B. Mitotic spreads of HeLa-T-REx cells overexpressing mCherry-RNaseH1 constructs,  
861 with indirect immunofluorescence for ACA, mCherry, and S9.6. C. Quantification of S9.6  
862 normalized to ACA. D. Quantification of total ACA signal, not significantly different in the two  
863 conditions. E-H. RPE1-T-REx cells treated as in Figure 1 E-H, with indirect immunofluorescence  
864 for ACA and Aurora B pT232 (E-F) or ACA, S9.6, and GFP (G-H). F. Quantification of Aurora  
865 B pT232 normalized to ACA. H. Quantification of S9.6 normalized to ACA.

866  
867 Supplemental Figure 3. Validation of MudPiT analysis of CPC members. A. Schematic  
868 representation of constructs expressed in HeLa-T-REx cells. B. Validation of localization of the  
869 LAP-tagged proteins. Overlap with indirect immunofluorescence of Borealin in mitotic cells  
870 indicates that the proteins localize correctly. C. Schematic representation of purification of  
871 proteins. D. DNA fragmentation after Micrococcal Nuclease (MNase) treatment. E. Silver stain  
872 gel showing purification of CPC members from LAP-Aurora B purification.

873  
874 Supplemental Figure 4. RBMX is necessary to localize the CPC and CPC localization signals. A.  
875 Two different shRNA constructs against RBMX effectively knock down protein levels of RBMX  
876 but have no effect on protein levels of CPC members, cohesion, Cyclin B1, or H3S10  
877 phosphorylation. B-I. Knockdown of RBMX by the first shRNA in A. in HeLa-T-REx cells leads  
878 to loss of B. Borealin immunofluorescence, quantified in C., D. Aurora B pT232  
879 immunofluorescence, quantified in E., F. H3pT3 immunofluorescence, quantified in G., and H.  
880 H2ApT120 immunofluorescence, quantified in I. J, knockdown of RBMX by the second shRNA  
881 confirms loss of Aurora B immunofluorescence, quantified in K. P-values determined by unpaired  
882 two-tailed t-test.

883



884 Supplemental Figure 5. RBMX is necessary to localize the CPC and CPC localization signals in  
885 an Aurora B activity dependent manner. A. Representative images of cells knocking down RBMX  
886 using shRNA #1 and adding back CENP-B DNA binding domain fused to INCENP in a tet-  
887 inducible manner, stained using indirect immunofluorescence for Aurora B and H3pT3.  
888 Centromeric Aurora B quantified in top left, centromeric H3pT3 quantified in bottom left. B.  
889 Representative images of cells knocking down RBMX using shRNA #1 and adding back CENP-  
890 B DNA binding domain fused to INCENP in a tet-inducible manner, stained using indirect  
891 immunofluorescence for Bub1 and H2ApT120. Centromeric Bub1 quantified in top left,  
892 centromeric H2ApT120 quantified in bottom left.

893  
894 Supplemental Figure 6. Aurora B controls localization of Sgo1, centromeric cohesion. A. HeLa-  
895 T-REx cells treated with Aurora B inhibitor Hesperadin at 100 nM and stained using indirect  
896 immunofluorescence for Aurora B, Sgo1 and ACA. Fluorescence intensity normalized to ACA is  
897 quantified in B, p-values determined by unpaired two-tailed t-test. C. PCS assay utilizing two  
898 different Aurora B inhibitors, ZM-447439 or Hesperadin, with and without MG132. D. Western  
899 blots validating knockdown of Aurora B using an shRNA against Aurora B, relative to non-  
900 targeting shCtrl. E. Interkinetochore distance assay, utilizing HeLa-T-REx cells stably expressing  
901 LAP-CENP-A either with shCtrl or shAurora B. Increase in interkinetochore distance quantified  
902 in F, p-value determined by unpaired two-tailed t-test.

903  
904 **Acknowledgements**  
905 We would like to acknowledge Dr. Sathyan Kizhake Mattada, Dr. Michael Guertin, Dr.  
906 Manikarna Dinda, and Dr. David Auble for reagents, Dr. Dan Burke for helpful comments and  
907 manuscript review, and Dr. Katherine Pfister, Dr. Ewa Niedzialkowska, Dr. Pawel Janczyk, Tan  
908 Truong, and Luke Elderidge for helpful discussions. Funding was provided by the National  
909 Institutes of Health grant P41 GM103533 (JY), T32 CA 9109-43 (EM), R01 GM118798 (PTS)  
910 and R01 GM124042 (PTS).

911  
912 **Competing Interests**  
913 We acknowledge no competing interests within this manuscript.

914



915 **References**

916

917 Banerjee, B., Kestner, C.A., and Stukenberg, P.T. (2014). EB1 enables spindle microtubules to  
918 regulate centromeric recruitment of Aurora B. *J. Cell Biol.* *204*, 947–963.

919 Baxter, J., Sen, N., Martínez, V.L., De Carandini, M.E.M., Schwartzman, J.B., Diffley, J.F.X., and  
920 Aragón, L. (2011). Positive supercoiling of mitotic DNA drives decatenation by topoisomerase II  
921 in eukaryotes. *Science* *331*, 1328–1332.

922 Bazett-Jones, D.P., Kimura, K., and Hirano, T. (2002). Efficient supercoiling of DNA by a single  
923 condensin complex as revealed by electron spectroscopic imaging. *Mol. Cell* *9*, 1183–1190.

924 Bhatia, V., Barroso, S.I., García-Rubio, M.L., Tumini, E., Herrera-Moyano, E., and Aguilera, A.  
925 (2014). BRCA2 prevents R-loop accumulation and associates with TREX-2 mRNA export factor  
926 PCID2. *Nature* *511*, 362–365.

927 Biggins, S., and Murray, A.W. (2001). The budding yeast protein kinase Ipl1/Aurora allows the  
928 absence of tension to activate the spindle checkpoint. *Genes Dev.* *15*, 3118–3129.

929 Blower, M.D. (2016). Centromeric Transcription Regulates Aurora-B Localization and Activation.  
930 *Cell Rep.* *15*, 1624–1633.

931 Boguslawski, S.J., Smith, D.E., Michalak, M.A., Mickelson, K.E., Yehle, C.O., Patterson, W.L., and  
932 Carrico, R.J. (1986). Characterization of monoclonal antibody to DNA.RNA and its application to  
933 immunodetection of hybrids. *J. Immunol. Methods* *89*, 123–130.

934 Britton, S., Deroncourt, E., Delteil, C., Froment, C., Schiltz, O., Salles, B., Frit, P., and Calsou, P.  
935 (2014). DNA damage triggers SAF-A and RNA biogenesis factors exclusion from chromatin  
936 coupled to R-loops removal. *Nucleic Acids Res.* *42*, 9047–9062.

937 Carmena, M., Wheelock, M., Funabiki, H., and Earnshaw, W.C. (2012). The chromosomal  
938 passenger complex (CPC): from easy rider to the godfather of mitosis. *Nat. Rev. Mol. Cell Biol.*  
939 *13*, 789–803.

940 Castellano-Pozo, M., Santos-Pereira, J.M., Rondón, A.G., Barroso, S., Andújar, E., Pérez-Alegre,  
941 M., García-Muse, T., and Aguilera, A. (2013a). R loops are linked to histone H3 S10  
942 phosphorylation and chromatin condensation. *Mol. Cell* *52*, 583–590.

943 Castellano-Pozo, M., Santos-Pereira, J.M., Rondón, A.G., Barroso, S., Andújar, E., Pérez-Alegre,  
944 M., García-Muse, T., and Aguilera, A. (2013b). R loops are linked to histone H3 S10  
945 phosphorylation and chromatin condensation. *Mol. Cell* *52*, 583–590.

946 Chan, F.L., Marshall, O.J., Saffery, R., Kim, B.W., Earle, E., Choo, K.H.A., and Wong, L.H. (2012).  
947 Active transcription and essential role of RNA polymerase II at the centromere during mitosis.  
948 *Proc. Natl. Acad. Sci. U. S. A.* *109*, 1979–1984.

- 949 Cheeseman, I.M., and Desai, A. (2005). A combined approach for the localization and tandem  
950 affinity purification of protein complexes from metazoans. *Sci. STKE Signal Transduct. Knowl.*  
951 *Environ.* 2005, pl1.
- 952 Cimini, D., Wan, X., Hirel, C.B., and Salmon, E.D. (2006). Aurora kinase promotes turnover of  
953 kinetochore microtubules to reduce chromosome segregation errors. *Curr. Biol.* CB 16, 1711–  
954 1718.
- 955 Coelho, P.A., Queiroz-Machado, J., Carmo, A.M., Moutinho-Pereira, S., Maiato, H., and Sunkel,  
956 C.E. (2008). Dual role of topoisomerase II in centromere resolution and aurora B activity. *PLoS*  
957 *Biol.* 6, e207.
- 958 Costantino, L., and Koshland, D. (2018). Genome-wide Map of R-Loop-Induced Damage Reveals  
959 How a Subset of R-Loops Contributes to Genomic Instability. *Mol. Cell* 71, 487-497.e3.
- 960 Cristini, A., Groh, M., Kristiansen, M.S., and Gromak, N. (2018). RNA/DNA Hybrid Interactome  
961 Identifies DXH9 as a Molecular Player in Transcriptional Termination and R-Loop-Associated  
962 DNA Damage. *Cell Rep.* 23, 1891–1905.
- 963 Dai, J., Sullivan, B.A., and Higgins, J.M.G. (2006). Regulation of mitotic chromosome cohesion by  
964 Haspin and Aurora B. *Dev. Cell* 11, 741–750.
- 965 Drolet, M., Phoenix, P., Menzel, R., Massé, E., Liu, L.F., and Crouch, R.J. (1995). Overexpression  
966 of RNase H partially complements the growth defect of an *Escherichia coli* delta topA mutant:  
967 R-loop formation is a major problem in the absence of DNA topoisomerase I. *Proc. Natl. Acad.*  
968 *Sci. U. S. A.* 92, 3526–3530.
- 969 El Hage, A., French, S.L., Beyer, A.L., and Tollervey, D. (2010). Loss of Topoisomerase I leads to  
970 R-loop-mediated transcriptional blocks during ribosomal RNA synthesis. *Genes Dev.* 24, 1546–  
971 1558.
- 972 Eng, J.K., McCormack, A.L., and Yates, J.R. (1994). An approach to correlate tandem mass  
973 spectral data of peptides with amino acid sequences in a protein database. *J. Am. Soc. Mass*  
974 *Spectrom.* 5, 976–989.
- 975 Feng, J., Liu, T., Qin, B., Zhang, Y., and Liu, X.S. (2012). Identifying ChIP-seq enrichment using  
976 MACS. *Nat. Protoc.* 7, 1728–1740.
- 977 Frankish, A., Diekhans, M., Ferreira, A.-M., Johnson, R., Jungreis, I., Loveland, J., Mudge, J.M.,  
978 Sisú, C., Wright, J., Armstrong, J., et al. (2019). GENCODE reference annotation for the human  
979 and mouse genomes. *Nucleic Acids Res.* 47, D766–D773.
- 980 Gan, W., Guan, Z., Liu, J., Gui, T., Shen, K., Manley, J.L., and Li, X. (2011). R-loop-mediated  
981 genomic instability is caused by impairment of replication fork progression. *Genes Dev.* 25,  
982 2041–2056.

- 983 Giménez-Abián, J.F., Sumara, I., Hirota, T., Hauf, S., Gerlich, D., de la Torre, C., Ellenberg, J., and  
984 Peters, J.-M. (2004). Regulation of sister chromatid cohesion between chromosome arms. *Curr.*  
985 *Biol. CB* *14*, 1187–1193.
- 986 Ginno, P.A., Lott, P.L., Christensen, H.C., Korf, I., and Chédin, F. (2012). R-loop formation is a  
987 distinctive characteristic of unmethylated human CpG island promoters. *Mol. Cell* *45*, 814–825.
- 988 Ginno, P.A., Lim, Y.W., Lott, P.L., Korf, I., and Chédin, F. (2013). GC skew at the 5' and 3' ends of  
989 human genes links R-loop formation to epigenetic regulation and transcription termination.  
990 *Genome Res.* *23*, 1590–1600.
- 991 Gottesfeld, J.M., and Forbes, D.J. (1997). Mitotic repression of the transcriptional machinery.  
992 *Trends Biochem. Sci.* *22*, 197–202.
- 993 Grenfell, A.W., Heald, R., and Strzelecka, M. (2016). Mitotic noncoding RNA processing  
994 promotes kinetochore and spindle assembly in *Xenopus*. *J. Cell Biol.* *214*, 133–141.
- 995 Gruneberg, U., Neef, R., Honda, R., Nigg, E.A., and Barr, F.A. (2004). Relocation of Aurora B from  
996 centromeres to the central spindle at the metaphase to anaphase transition requires MKlp2. *J.*  
997 *Cell Biol.* *166*, 167–172.
- 998 Halász, L., Karányi, Z., Boros-Oláh, B., Kuik-Rózsa, T., Sipos, É., Nagy, É., Mosolygó-L, Á., Mázló,  
999 A., Rajnavölgyi, É., Halmos, G., et al. (2017). RNA-DNA hybrid (R-loop) immunoprecipitation  
1000 mapping: an analytical workflow to evaluate inherent biases. *Genome Res.* *27*, 1063–1073.
- 1001 Hall, L.L., Carone, D.M., Gomez, A.V., Kolpa, H.J., Byron, M., Mehta, N., Fackelmayer, F.O., and  
1002 Lawrence, J.B. (2014). Stable COT-1 repeat RNA is abundant and is associated with euchromatic  
1003 interphase chromosomes. *Cell* *156*, 907–919.
- 1004 Hauf, S., Cole, R.W., LaTerra, S., Zimmer, C., Schnapp, G., Walter, R., Heckel, A., van Meel, J.,  
1005 Rieder, C.L., and Peters, J.-M. (2003). The small molecule Hesperadin reveals a role for Aurora B  
1006 in correcting kinetochore-microtubule attachment and in maintaining the spindle assembly  
1007 checkpoint. *J. Cell Biol.* *161*, 281–294.
- 1008 Heinz, S., Benner, C., Spann, N., Bertolino, E., Lin, Y.C., Laslo, P., Cheng, J.X., Murre, C., Singh, H.,  
1009 and Glass, C.K. (2010). Simple combinations of lineage-determining transcription factors prime  
1010 cis-regulatory elements required for macrophage and B cell identities. *Mol. Cell* *38*, 576–589.
- 1011 Hindriksen, S., Lens, S.M.A., and Hadders, M.A. (2017). The Ins and Outs of Aurora B Inner  
1012 Centromere Localization. *Front. Cell Dev. Biol.* *5*, 112.
- 1013 Hirota, T., Lipp, J.J., Toh, B.-H., and Peters, J.-M. (2005). Histone H3 serine 10 phosphorylation  
1014 by Aurora B causes HP1 dissociation from heterochromatin. *Nature* *438*, 1176–1180.
- 1015 Hubley, R., Finn, R.D., Clements, J., Eddy, S.R., Jones, T.A., Bao, W., Smit, A.F.A., and Wheeler,  
1016 T.J. (2016). The Dfam database of repetitive DNA families. *Nucleic Acids Res.* *44*, D81–89.

- 1017 Huen, M.S.Y., Sy, S.M.H., Leung, K.M., Ching, Y.-P., Tipoe, G.L., Man, C., Dong, S., and Chen, J.  
1018 (2010). SON is a spliceosome-associated factor required for mitotic progression. *Cell Cycle*  
1019 *Georget. Tex* 9, 2679–2685.
- 1020 Ideue, T., Cho, Y., Nishimura, K., and Tani, T. (2014). Involvement of satellite I noncoding RNA in  
1021 regulation of chromosome segregation. *Genes Cells Devoted Mol. Cell. Mech.* 19, 528–538.
- 1022 Jambhekar, A., Emerman, A.B., Schweidenback, C.T.H., and Blower, M.D. (2014). RNA stimulates  
1023 Aurora B kinase activity during mitosis. *PLoS One* 9, e100748.
- 1024 Jeyaprakash, A.A., Klein, U.R., Lindner, D., Ebert, J., Nigg, E.A., and Conti, E. (2007). Structure of  
1025 a Survivin-Borealin-INCENP core complex reveals how chromosomal passengers travel together.  
1026 *Cell* 131, 271–285.
- 1027 Jiang, Y., Liu, M., Spencer, C.A., and Price, D.H. (2004). Involvement of transcription termination  
1028 factor 2 in mitotic repression of transcription elongation. *Mol. Cell* 14, 375–385.
- 1029 Kabeche, L., Nguyen, H.D., Buisson, R., and Zou, L. (2018). A mitosis-specific and R loop-driven  
1030 ATR pathway promotes faithful chromosome segregation. *Science* 359, 108–114.
- 1031 Kallio, M.J., McClelland, M.L., Stukenberg, P.T., and Gorbsky, G.J. (2002). Inhibition of aurora B  
1032 kinase blocks chromosome segregation, overrides the spindle checkpoint, and perturbs  
1033 microtubule dynamics in mitosis. *Curr. Biol. CB* 12, 900–905.
- 1034 Kang, J., Chaudhary, J., Dong, H., Kim, S., Brautigam, C.A., and Yu, H. (2011). Mitotic centromeric  
1035 targeting of HP1 and its binding to Sgo1 are dispensable for sister-chromatid cohesion in human  
1036 cells. *Mol. Biol. Cell* 22, 1181–1190.
- 1037 Karamysheva, Z., Díaz-Martínez, L.A., Warrington, R., and Yu, H. (2015). Graded requirement for  
1038 the spliceosome in cell cycle progression. *Cell Cycle Georget. Tex* 14, 1873–1883.
- 1039 Kimura, K., and Hirano, T. (1997). ATP-dependent positive supercoiling of DNA by 13S  
1040 condensin: a biochemical implication for chromosome condensation. *Cell* 90, 625–634.
- 1041 Kimura, K., Rybenkov, V.V., Crisona, N.J., Hirano, T., and Cozzarelli, N.R. (1999). 13S condensin  
1042 actively reconfigures DNA by introducing global positive writhe: implications for chromosome  
1043 condensation. *Cell* 98, 239–248.
- 1044 Kitajima, T.S., Sakuno, T., Ishiguro, K., Iemura, S., Natsume, T., Kawashima, S.A., and Watanabe,  
1045 Y. (2006). Shugoshin collaborates with protein phosphatase 2A to protect cohesin. *Nature* 441,  
1046 46–52.
- 1047 Klein, U.R., Nigg, E.A., and Gruneberg, U. (2006). Centromere targeting of the chromosomal  
1048 passenger complex requires a ternary subcomplex of Borealin, Survivin, and the N-terminal  
1049 domain of INCENP. *Mol. Biol. Cell* 17, 2547–2558.

- 1050 Knowlton, A.L., Lan, W., and Stukenberg, P.T. (2006). Aurora B is enriched at merotelic  
1051 attachment sites, where it regulates MCAK. *Curr. Biol. CB* 16, 1705–1710.
- 1052 van der Lelij, P., Stocsits, R.R., Ladurner, R., Petzold, G., Kreidl, E., Koch, B., Schmitz, J.,  
1053 Neumann, B., Ellenberg, J., and Peters, J.-M. (2014). SNW1 enables sister chromatid cohesion  
1054 by mediating the splicing of sororin and APC2 pre-mRNAs. *EMBO J.* 33, 2643–2658.
- 1055 Li, H., and Durbin, R. (2009). Fast and accurate short read alignment with Burrows-Wheeler  
1056 transform. *Bioinforma. Oxf. Engl.* 25, 1754–1760.
- 1057 Liu, D., Vader, G., Vromans, M.J.M., Lampson, M.A., and Lens, S.M.A. (2009). Sensing  
1058 chromosome bi-orientation by spatial separation of aurora B kinase from kinetochore  
1059 substrates. *Science* 323, 1350–1353.
- 1060 Liu, H., Qu, Q., Warrington, R., Rice, A., Cheng, N., and Yu, H. (2015). Mitotic Transcription  
1061 Installs Sgo1 at Centromeres to Coordinate Chromosome Segregation. *Mol. Cell* 59, 426–436.
- 1062 Liu, Y., Su, H., Zhang, J., Liu, Y., Feng, C., and Han, F. (2020). Back-spliced RNA from  
1063 retrotransposon binds to centromere and regulates centromeric chromatin loops in maize. *PLoS*  
1064 *Biol.* 18, e3000582.
- 1065 Losada, A., Hirano, M., and Hirano, T. (2002). Cohesin release is required for sister chromatid  
1066 resolution, but not for condensin-mediated compaction, at the onset of mitosis. *Genes Dev.* 16,  
1067 3004–3016.
- 1068 Losada, A., Yokochi, T., and Hirano, T. (2005). Functional contribution of Pds5 to cohesin-  
1069 mediated cohesion in human cells and *Xenopus* egg extracts. *J. Cell Sci.* 118, 2133–2141.
- 1070 Mapleson, D., Garcia Accinelli, G., Kettleborough, G., Wright, J., and Clavijo, B.J. (2017). KAT: a  
1071 K-mer analysis toolkit to quality control NGS datasets and genome assemblies. *Bioinforma. Oxf.*  
1072 *Engl.* 33, 574–576.
- 1073 Matsunaga, S., Takata, H., Morimoto, A., Hayashihara, K., Higashi, T., Akatsuchi, K., Mizusawa,  
1074 E., Yamakawa, M., Ashida, M., Matsunaga, T.M., et al. (2012). RBMX: a regulator for  
1075 maintenance and centromeric protection of sister chromatid cohesion. *Cell Rep.* 1, 299–308.
- 1076 McNulty, S.M., Sullivan, L.L., and Sullivan, B.A. (2017). Human Centromeres Produce  
1077 Chromosome-Specific and Array-Specific Alpha Satellite Transcripts that Are Complexed with  
1078 CENP-A and CENP-C. *Dev. Cell* 42, 226–240.e6.
- 1079 Meppelink, A., Kabeche, L., Vromans, M.J.M., Compton, D.A., and Lens, S.M.A. (2015).  
1080 Shugoshin-1 balances Aurora B kinase activity via PP2A to promote chromosome bi-orientation.  
1081 *Cell Rep.* 11, 508–515.
- 1082 Miga, K.H. (2017). Chromosome-Specific Centromere Sequences Provide an Estimate of the  
1083 Ancestral Chromosome 2 Fusion Event in Hominin Genomes. *J. Hered.* 108, 45–52.

- 1084 Mirkovitch, J., Gasser, S.M., and Laemmli, U.K. (1987). Relation of chromosome structure and  
1085 gene expression. *Philos. Trans. R. Soc. Lond. B. Biol. Sci.* *317*, 563–574.
- 1086 Morrison, C., Henzing, A.J., Jensen, O.N., Osheroff, N., Dodson, H., Kandels-Lewis, S.E., Adams,  
1087 R.R., and Earnshaw, W.C. (2002). Proteomic analysis of human metaphase chromosomes  
1088 reveals topoisomerase II alpha as an Aurora B substrate. *Nucleic Acids Res.* *30*, 5318–5327.
- 1089 Nadel, J., Athanasiadou, R., Lemetre, C., Wijetunga, N.A., Ó Broin, P., Sato, H., Zhang, Z.,  
1090 Jeddeloh, J., Montagna, C., Golden, A., et al. (2015). RNA:DNA hybrids in the human genome  
1091 have distinctive nucleotide characteristics, chromatin composition, and transcriptional  
1092 relationships. *Epigenetics Chromatin* *8*, 46.
- 1093 Nakama, M., Kawakami, K., Kajitani, T., Urano, T., and Murakami, Y. (2012). DNA-RNA hybrid  
1094 formation mediates RNAi-directed heterochromatin formation. *Genes Cells Devoted Mol. Cell.*  
1095 *Mech.* *17*, 218–233.
- 1096 Naumova, N., Imakaev, M., Fudenberg, G., Zhan, Y., Lajoie, B.R., Mirny, L.A., and Dekker, J.  
1097 (2013). Organization of the mitotic chromosome. *Science* *342*, 948–953.
- 1098 Neumann, P., Navrátilová, A., Schroeder-Reiter, E., Koblížková, A., Steinbauerová, V.,  
1099 Chocholová, E., Novák, P., Wanner, G., and Macas, J. (2012). Stretching the rules: monocentric  
1100 chromosomes with multiple centromere domains. *PLoS Genet.* *8*, e1002777.
- 1101 Nishimura, K., Cho, Y., Tokunaga, K., Nakao, M., Tani, T., and Ideue, T. (2019). DEAH box RNA  
1102 helicase DHX38 associates with satellite I noncoding RNA involved in chromosome segregation.  
1103 *Genes Cells Devoted Mol. Cell. Mech.* *24*, 585–590.
- 1104 Nishiyama, T., Sykora, M.M., Huis in 't Veld, P.J., Mechtler, K., and Peters, J.-M. (2013). Aurora B  
1105 and Cdk1 mediate Wapl activation and release of acetylated cohesin from chromosomes by  
1106 phosphorylating Sororin. *Proc. Natl. Acad. Sci. U. S. A.* *110*, 13404–13409.
- 1107 Novák, P., Neumann, P., and Macas, J. (2010). Graph-based clustering and characterization of  
1108 repetitive sequences in next-generation sequencing data. *BMC Bioinformatics* *11*, 378.
- 1109 Novák, P., Neumann, P., Pech, J., Steinhaisl, J., and Macas, J. (2013). RepeatExplorer: a Galaxy-  
1110 based web server for genome-wide characterization of eukaryotic repetitive elements from  
1111 next-generation sequence reads. *Bioinforma. Oxf. Engl.* *29*, 792–793.
- 1112 Nozawa, R.-S., Nagao, K., Masuda, H.-T., Iwasaki, O., Hirota, T., Nozaki, N., Kimura, H., and  
1113 Obuse, C. (2010). Human POGZ modulates dissociation of HP1alpha from mitotic chromosome  
1114 arms through Aurora B activation. *Nat. Cell Biol.* *12*, 719–727.
- 1115 Ohle, C., Tesorero, R., Schermann, G., Dobrev, N., Sinning, I., and Fischer, T. (2016). Transient  
1116 RNA-DNA Hybrids Are Required for Efficient Double-Strand Break Repair. *Cell* *167*, 1001-  
1117 1013.e7.



- 1118 Parsons, G.G., and Spencer, C.A. (1997). Mitotic repression of RNA polymerase II transcription is  
1119 accompanied by release of transcription elongation complexes. *Mol. Cell. Biol.* *17*, 5791–5802.
- 1120 Paulson, J.R. (1982). Isolation of chromosome clusters from metaphase-arrested HeLa cells.  
1121 *Chromosoma* *85*, 571–581.
- 1122 Peng, J., Elias, J.E., Thoreen, C.C., Licklider, L.J., and Gygi, S.P. (2003). Evaluation of  
1123 multidimensional chromatography coupled with tandem mass spectrometry (LC/LC-MS/MS) for  
1124 large-scale protein analysis: the yeast proteome. *J. Proteome Res.* *2*, 43–50.
- 1125 Perea-Resa, C., and Blower, M.D. (2017). Satellite Transcripts Locally Promote Centromere  
1126 Formation. *Dev. Cell* *42*, 201–202.
- 1127 Perea-Resa, C., Bury, L., Cheeseman, I.M., and Blower, M.D. (2020). Cohesin Removal  
1128 Reprograms Gene Expression upon Mitotic Entry. *Mol. Cell* *78*, 127-140.e7.
- 1129 Petsalaki, E., Akoumianaki, T., Black, E.J., Gillespie, D.A.F., and Zachos, G. (2011).  
1130 Phosphorylation at serine 331 is required for Aurora B activation. *J. Cell Biol.* *195*, 449–466.
- 1131 Prescott, D.M., and Bender, M.A. (1962). Synthesis of RNA and protein during mitosis in  
1132 mammalian tissue culture cells. *Exp. Cell Res.* *26*, 260–268.
- 1133 Resnick, T.D., Satinover, D.L., MacIsaac, F., Stukenberg, P.T., Earnshaw, W.C., Orr-Weaver, T.L.,  
1134 and Carmena, M. (2006). INCENP and Aurora B promote meiotic sister chromatid cohesion  
1135 through localization of the Shugoshin MEI-S332 in *Drosophila*. *Dev. Cell* *11*, 57–68.
- 1136 Sacristan, C., and Kops, G.J.P.L. (2015). Joined at the hip: kinetochores, microtubules, and  
1137 spindle assembly checkpoint signaling. *Trends Cell Biol.* *25*, 21–28.
- 1138 Salimian, K.J., Ballister, E.R., Smoak, E.M., Wood, S., Panchenko, T., Lampson, M.A., and Black,  
1139 B.E. (2011). Feedback control in sensing chromosome biorientation by the Aurora B kinase.  
1140 *Curr. Biol. CB* *21*, 1158–1165.
- 1141 Santaguida, S., Vernieri, C., Villa, F., Ciliberto, A., and Musacchio, A. (2011). Evidence that  
1142 Aurora B is implicated in spindle checkpoint signalling independently of error correction. *EMBO*  
1143 *J.* *30*, 1508–1519.
- 1144 Skourti-Stathaki, K., Kamieniarz-Gdula, K., and Proudfoot, N.J. (2014). R-loops induce repressive  
1145 chromatin marks over mammalian gene terminators. *Nature* *516*, 436–439.
- 1146 Stolz, R., Sulthana, S., Hartono, S.R., Malig, M., Benham, C.J., and Chedin, F. (2019). Interplay  
1147 between DNA sequence and negative superhelicity drives R-loop structures. *Proc. Natl. Acad.*  
1148 *Sci. U. S. A.* *116*, 6260–6269.
- 1149 Strissel, P.L., Espinosa, R., Rowley, J.D., and Swift, H. (1996). Scaffold attachment regions in  
1150 centromere-associated DNA. *Chromosoma* *105*, 122–133.



- 1151 Stukenberg, P.T., and Burke, D.J. (2015). Connecting the microtubule attachment status of each  
1152 kinetochore to cell cycle arrest through the spindle assembly checkpoint. *Chromosoma* *124*,  
1153 463–480.
- 1154 Sundaramoorthy, S., Vázquez-Novelle, M.D., Lekomtsev, S., Howell, M., and Petronczki, M.  
1155 (2014). Functional genomics identifies a requirement of pre-mRNA splicing factors for sister  
1156 chromatid cohesion. *EMBO J.* *33*, 2623–2642.
- 1157 Tang, Z., Shu, H., Qi, W., Mahmood, N.A., Mumby, M.C., and Yu, H. (2006). PP2A is required for  
1158 centromeric localization of Sgo1 and proper chromosome segregation. *Dev. Cell* *10*, 575–585.
- 1159 Tanno, Y., Kitajima, T.S., Honda, T., Ando, Y., Ishiguro, K.-I., and Watanabe, Y. (2010).  
1160 Phosphorylation of mammalian Sgo2 by Aurora B recruits PP2A and MCAK to centromeres.  
1161 *Genes Dev.* *24*, 2169–2179.
- 1162 Taylor, J.H. (1960). Nucleic acid synthesis in relation to the cell division cycle. *Ann. N. Y. Acad.*  
1163 *Sci.* *90*, 409–421.
- 1164 van der Waal, M.S., Saurin, A.T., Vromans, M.J.M., Vleugel, M., Wurzenberger, C., Gerlich, D.W.,  
1165 Medema, R.H., Kops, G.J.P.L., and Lens, S.M.A. (2012). Mps1 promotes rapid centromere  
1166 accumulation of Aurora B. *EMBO Rep.* *13*, 847–854.
- 1167 Wahba, L., Amon, J.D., Koshland, D., and Vuica-Ross, M. (2011). RNase H and multiple RNA  
1168 biogenesis factors cooperate to prevent RNA:DNA hybrids from generating genome instability.  
1169 *Mol. Cell* *44*, 978–988.
- 1170 Washburn, M.P., Wolters, D., and Yates, J.R. (2001). Large-scale analysis of the yeast proteome  
1171 by multidimensional protein identification technology. *Nat. Biotechnol.* *19*, 242–247.
- 1172 Welburn, J.P.I., Vleugel, M., Liu, D., Yates, J.R., Lampson, M.A., Fukagawa, T., and Cheeseman,  
1173 I.M. (2010). Aurora B phosphorylates spatially distinct targets to differentially regulate the  
1174 kinetochore-microtubule interface. *Mol. Cell* *38*, 383–392.
- 1175 Willard, H.F. (1985). Chromosome-specific organization of human alpha satellite DNA. *Am. J.*  
1176 *Hum. Genet.* *37*, 524–532.
- 1177 Yang, X., Boehm, J.S., Yang, X., Salehi-Ashtiani, K., Hao, T., Shen, Y., Lubonja, R., Thomas, S.R.,  
1178 Alkan, O., Bhimdi, T., et al. (2011). A public genome-scale lentiviral expression library of human  
1179 ORFs. *Nat. Methods* *8*, 659–661.
- 1180 Yasuhara, T., Kato, R., Hagiwara, Y., Shiotani, B., Yamauchi, M., Nakada, S., Shibata, A., and  
1181 Miyagawa, K. (2018). Human Rad52 Promotes XPG-Mediated R-loop Processing to Initiate  
1182 Transcription-Associated Homologous Recombination Repair. *Cell* *175*, 558-570.e11.

1183 Zhang, Y., Liu, T., Meyer, C.A., Eeckhoute, J., Johnson, D.S., Bernstein, B.E., Nusbaum, C., Myers,  
1184 R.M., Brown, M., Li, W., et al. (2008). Model-based analysis of ChIP-Seq (MACS). *Genome Biol.*  
1185 *9*, R137.

1186

1187

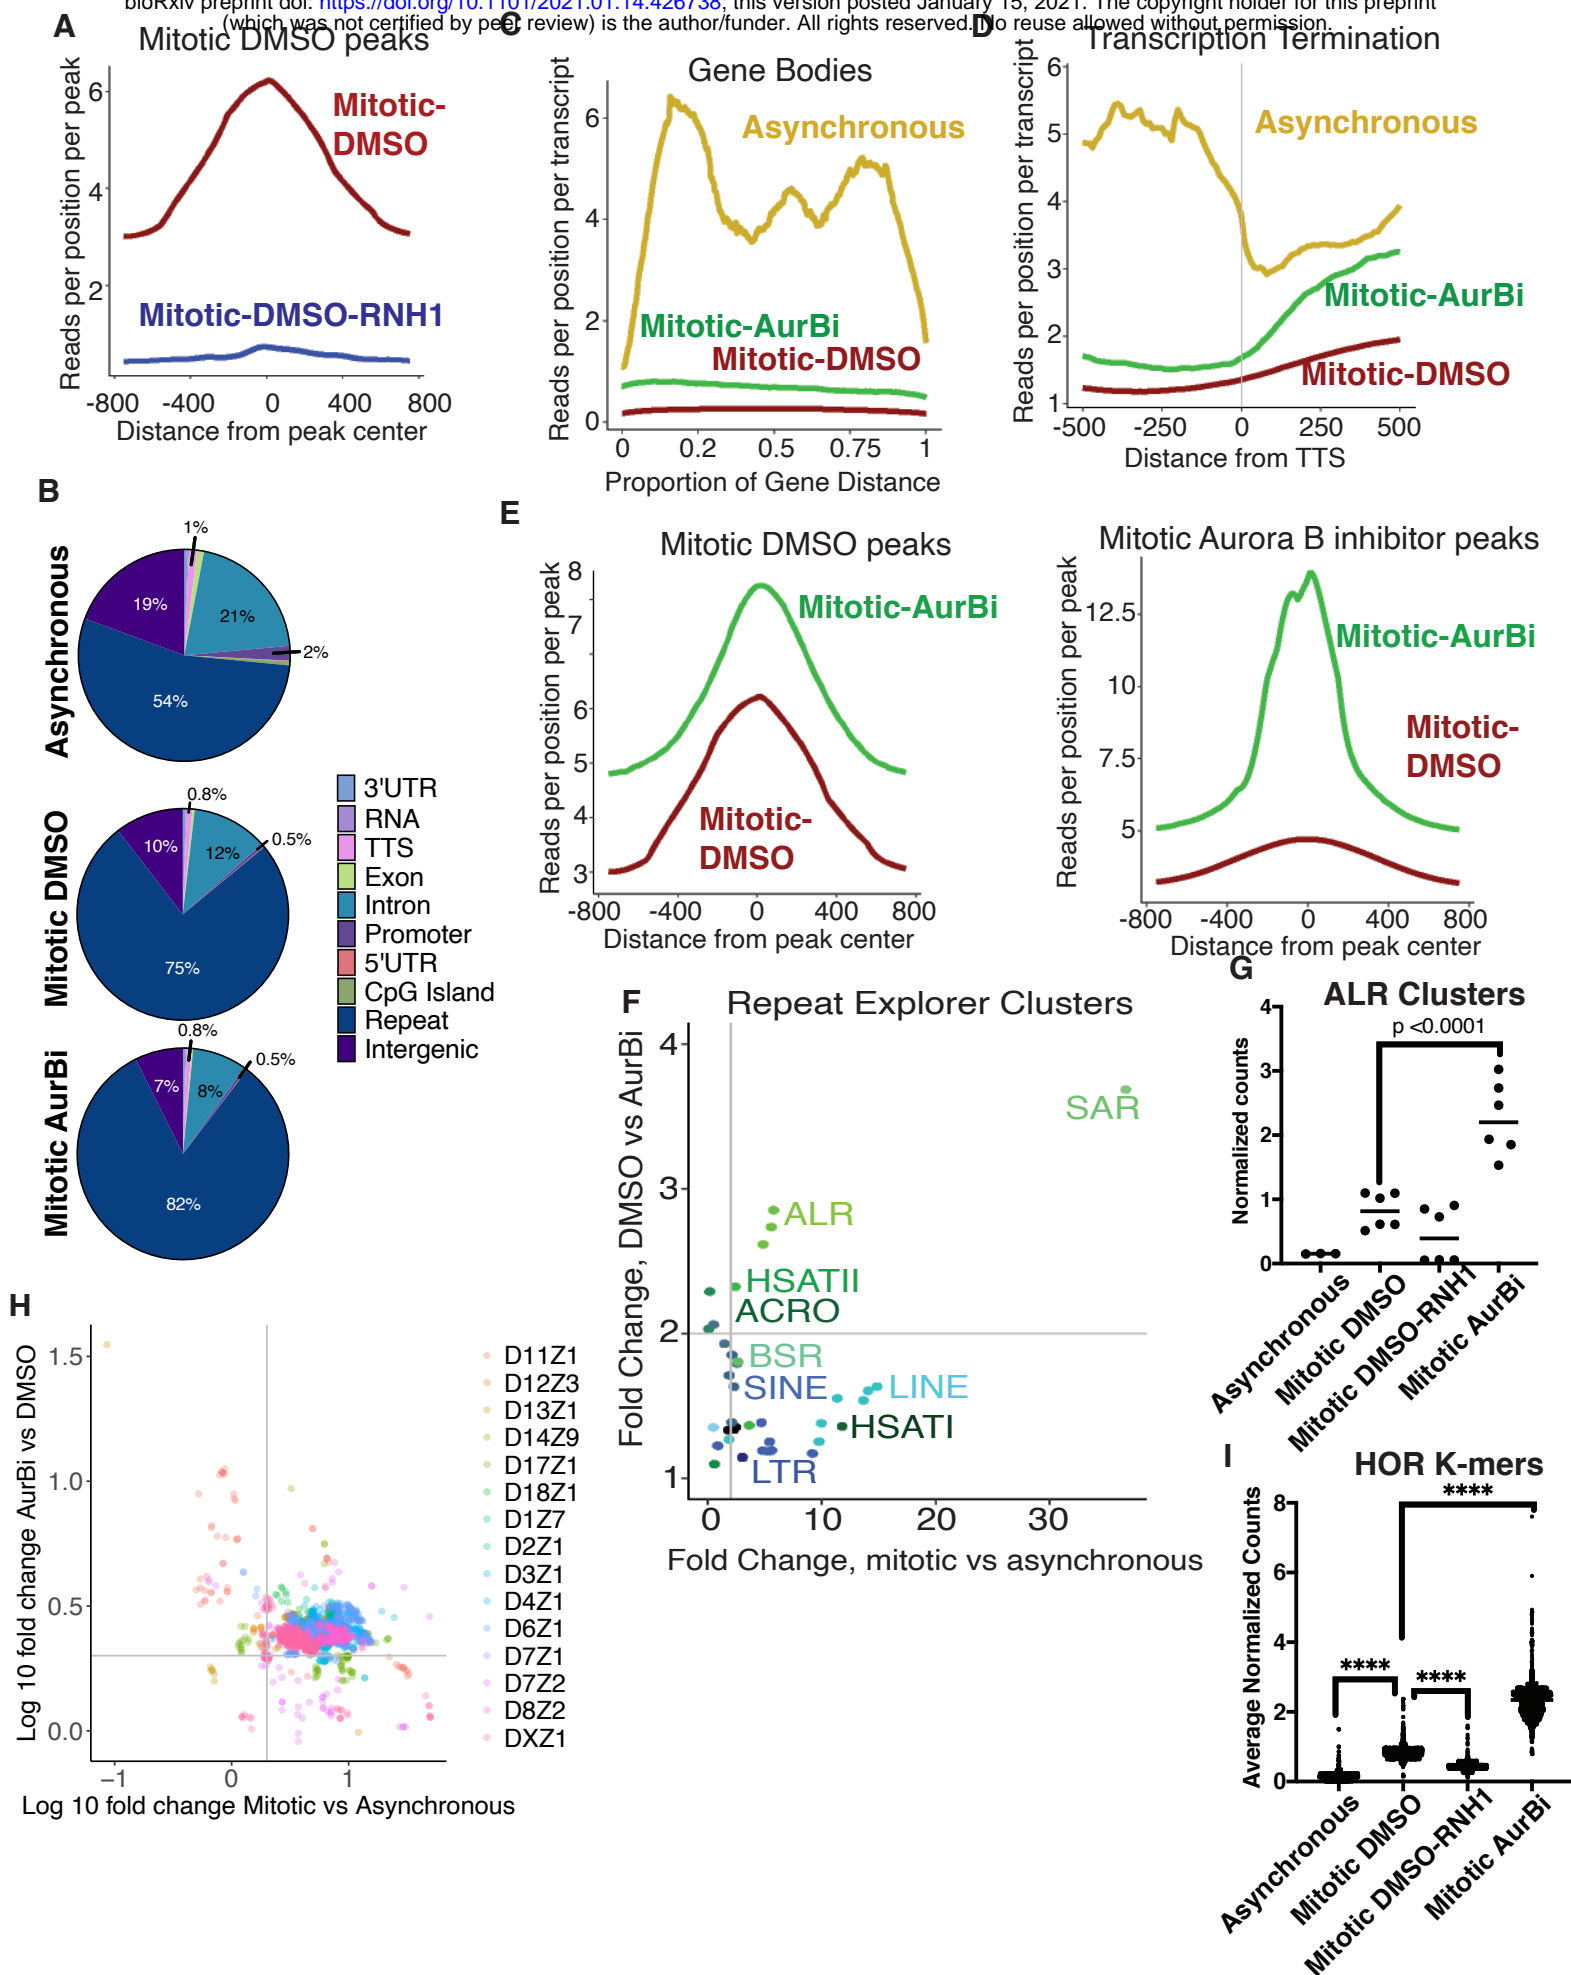

Figure 1. Aurora B is responsible for removing R-loops from Centromeric Satellite Repeats.

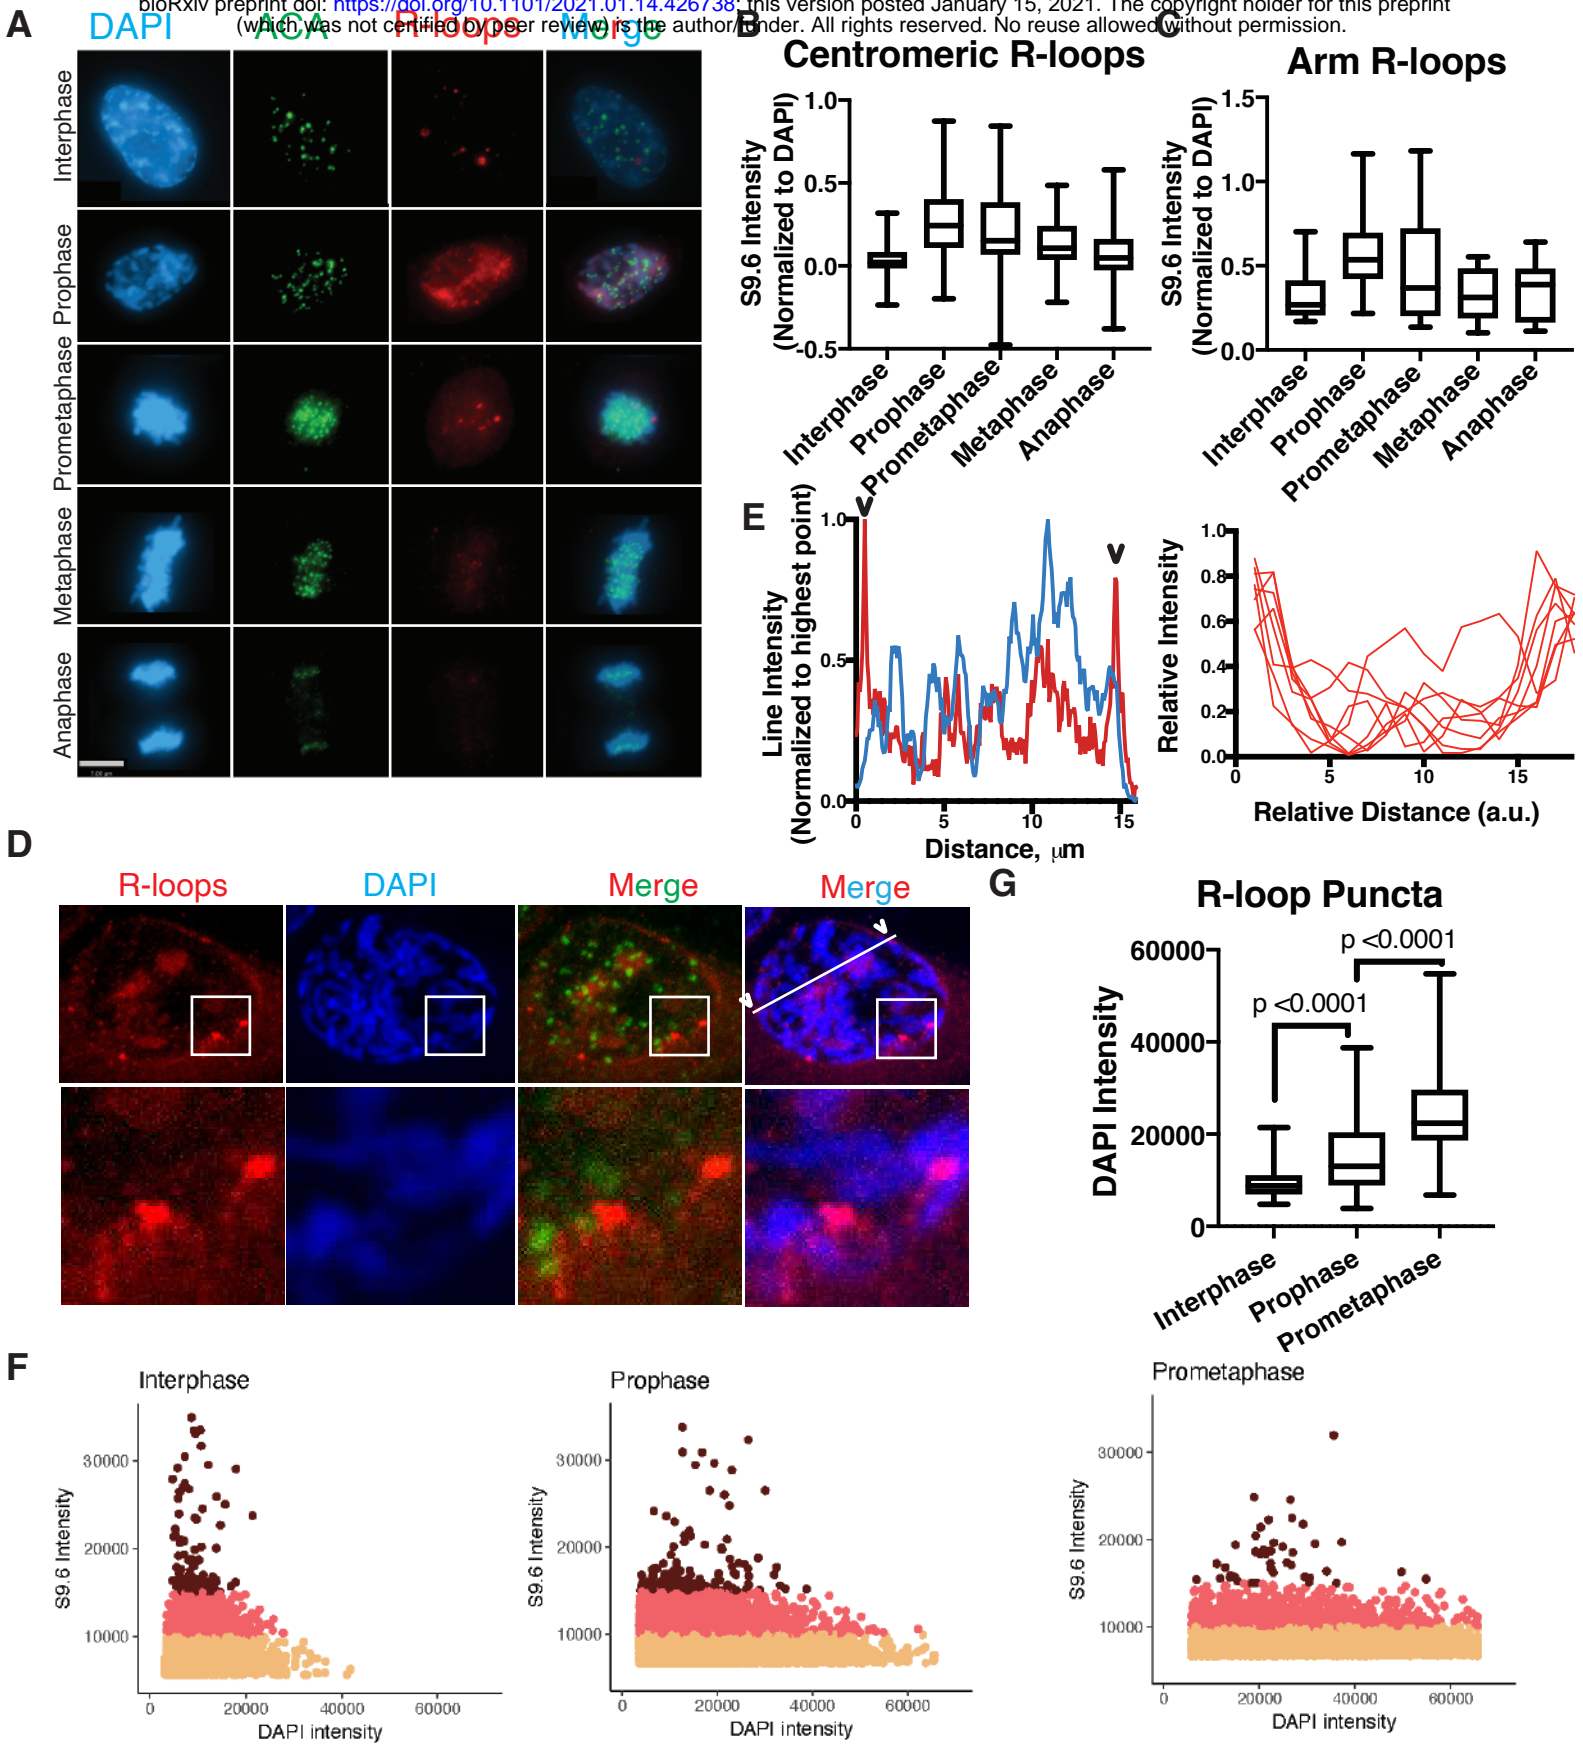

**Figure 2. Mitotic R-loops are dynamic and associated with the nuclear periphery during prophase.**

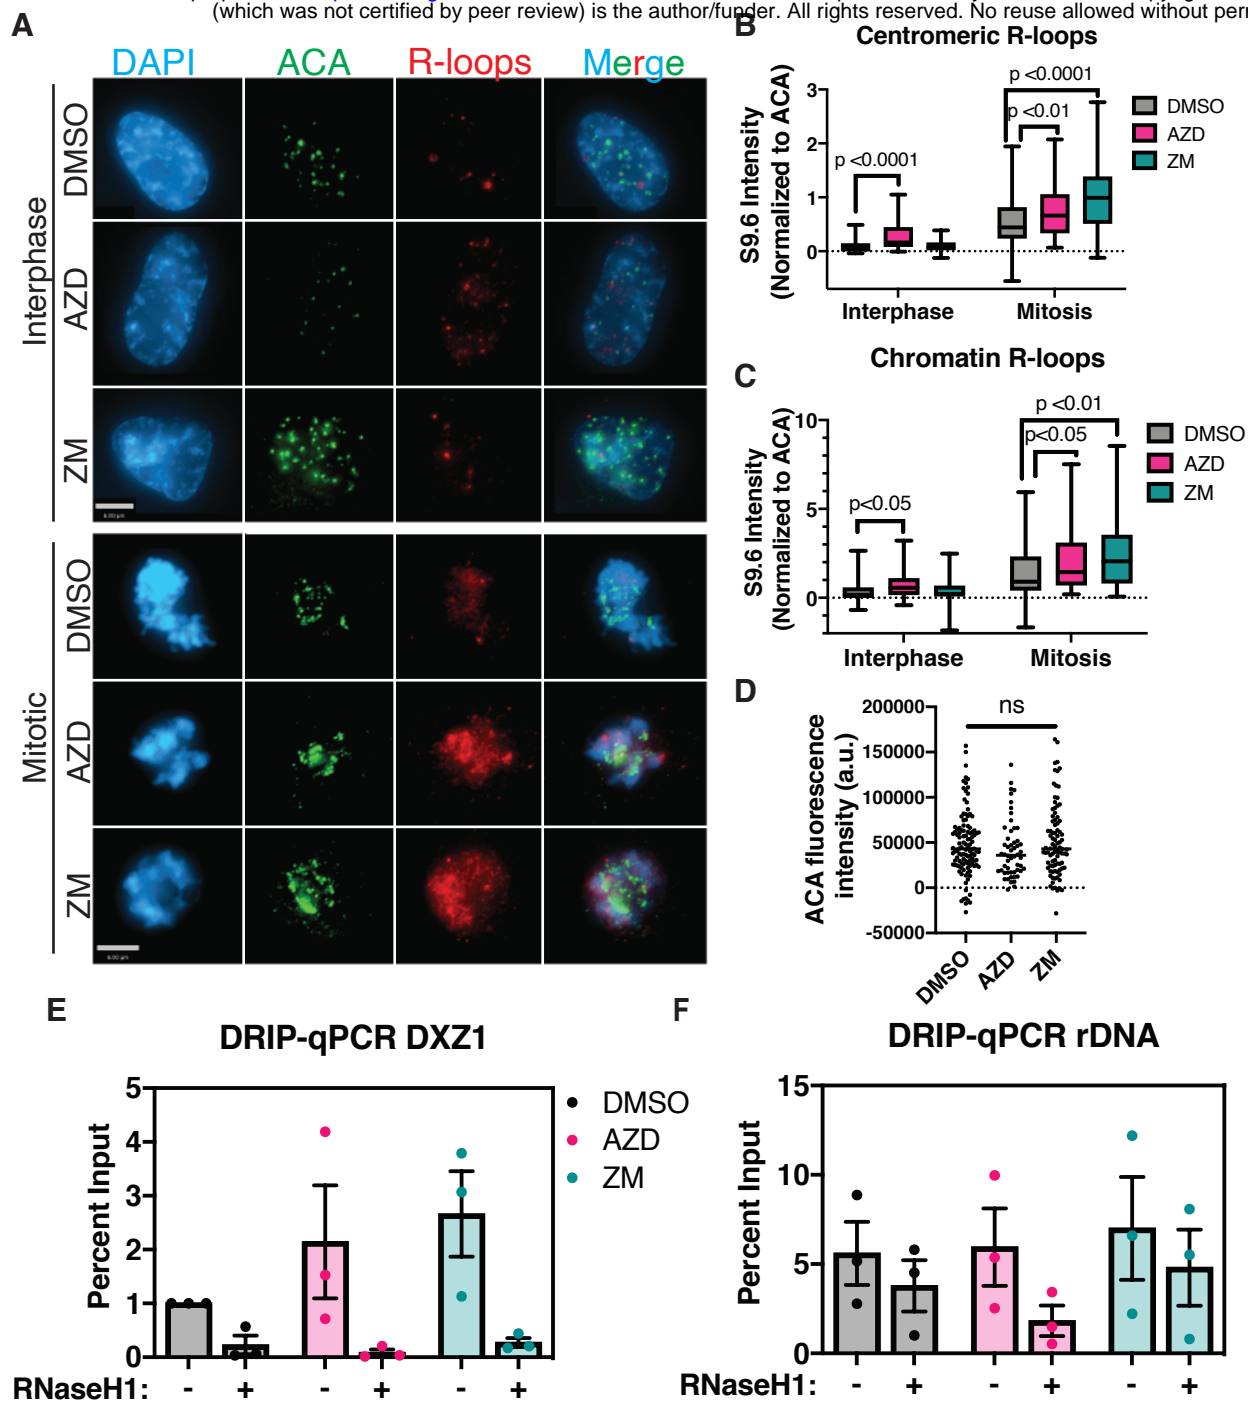

Figure 3. Aurora B activity promotes R-loop resolution in mitosis.

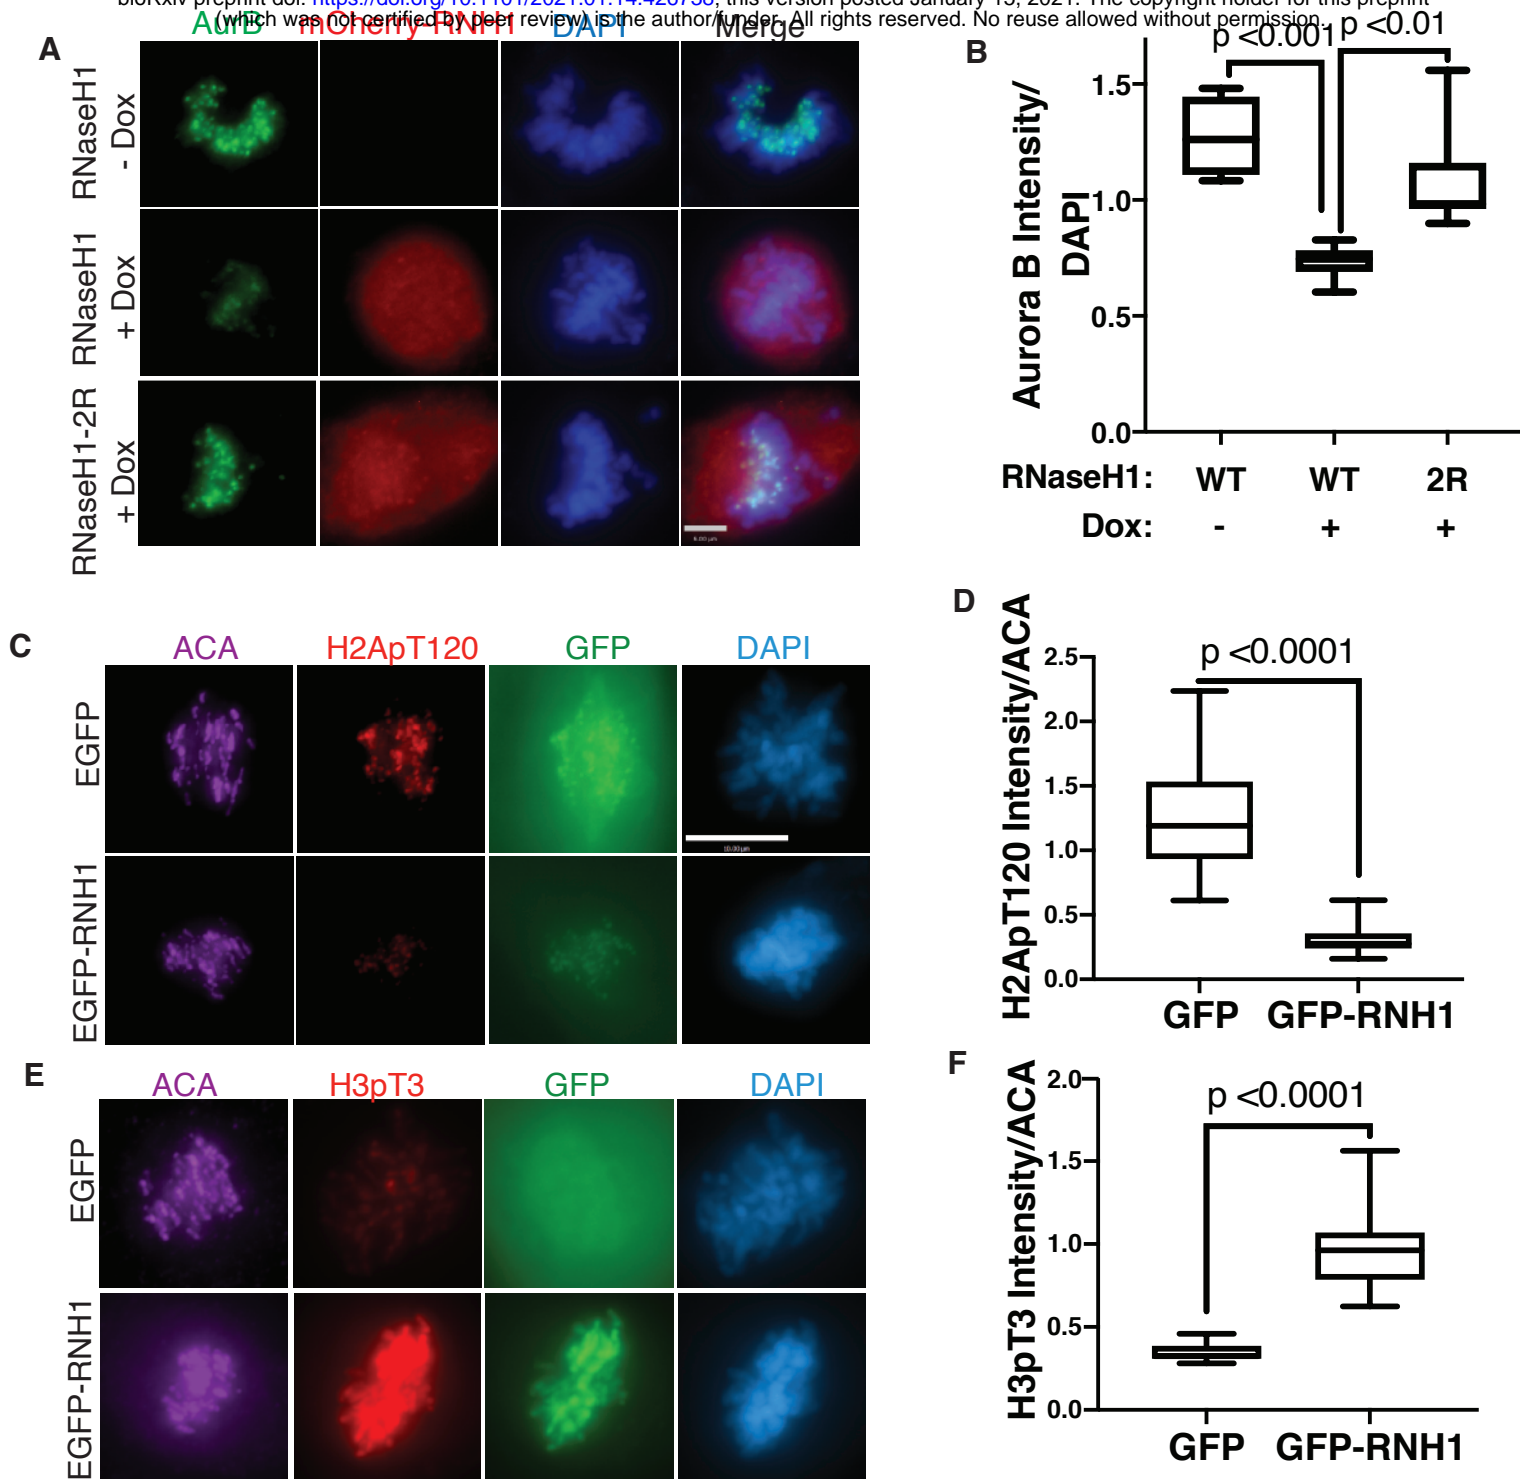

Figure 4. R-loop presence is necessary to localize AuroraB.



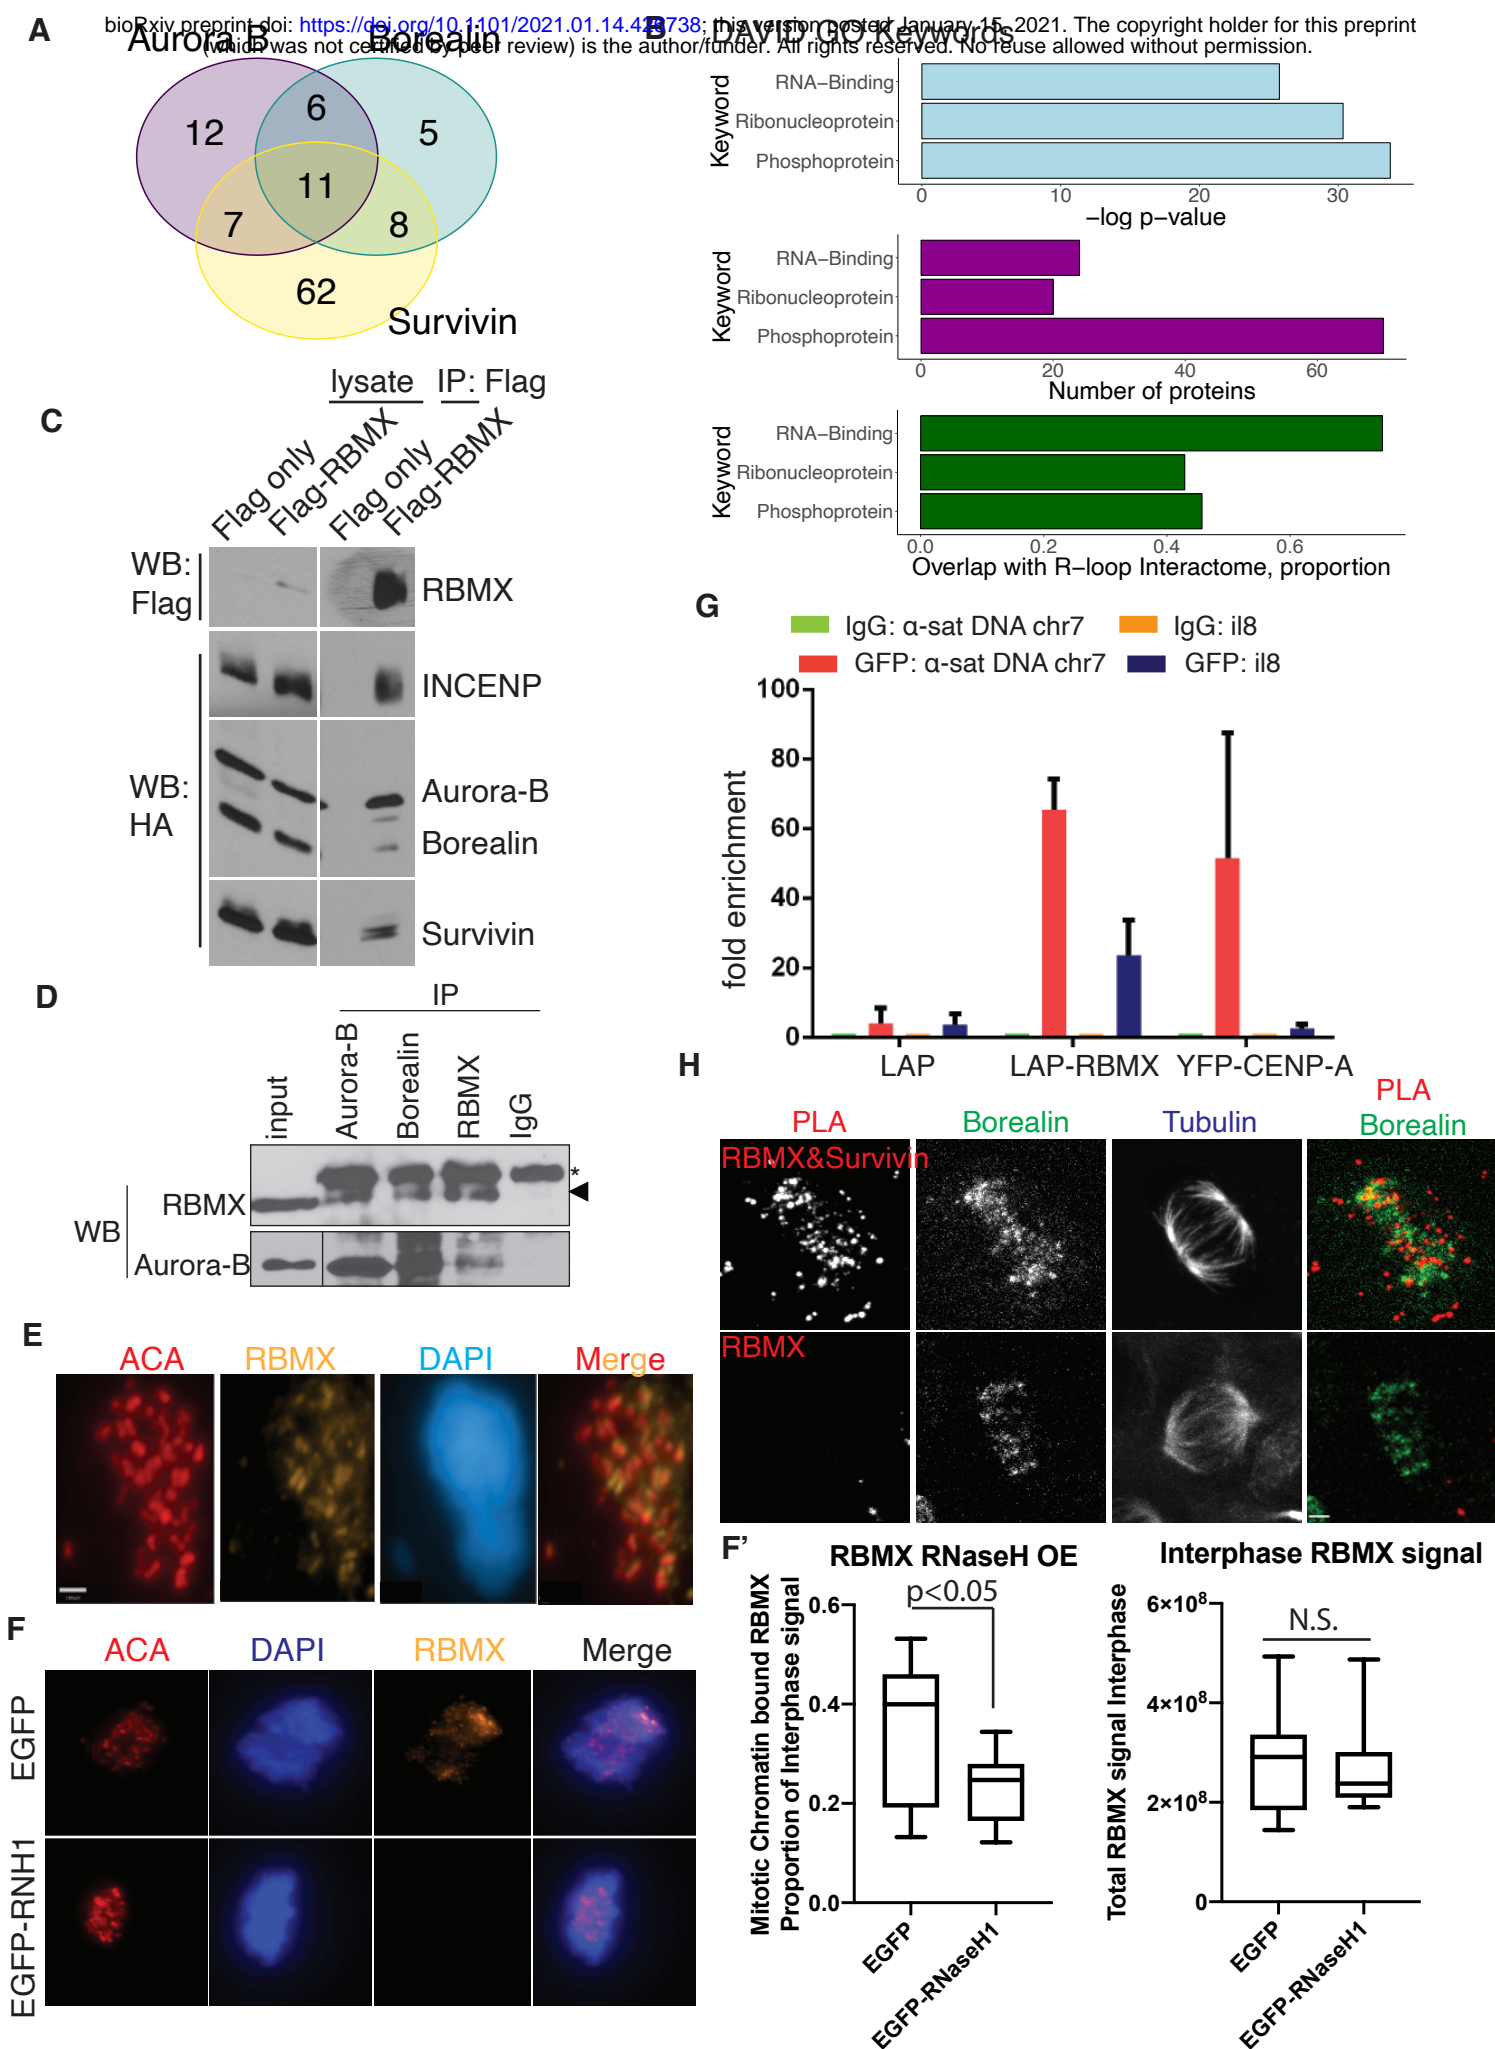

Figure 5. RBMX associates with the CPC and R-loops.



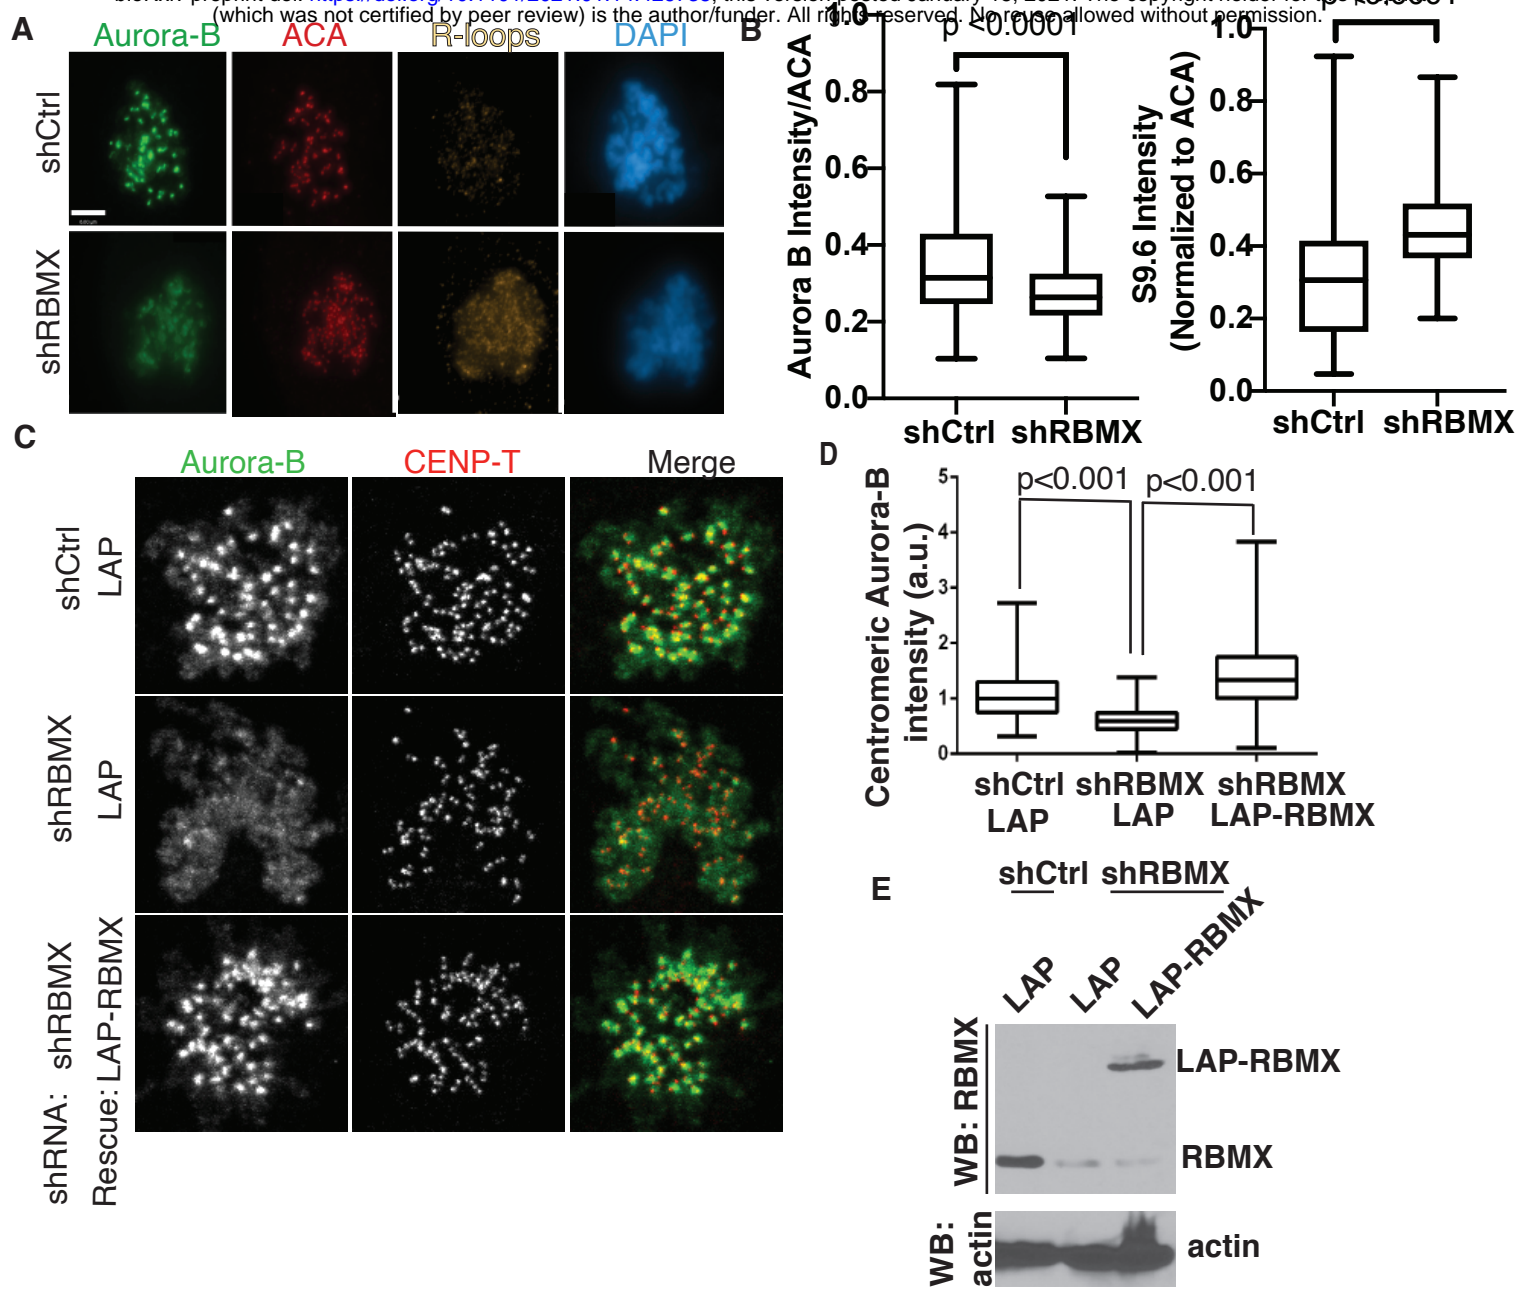

**Figure 6. RBMX is necessary to resolve R-loops and localize Aurora B.**

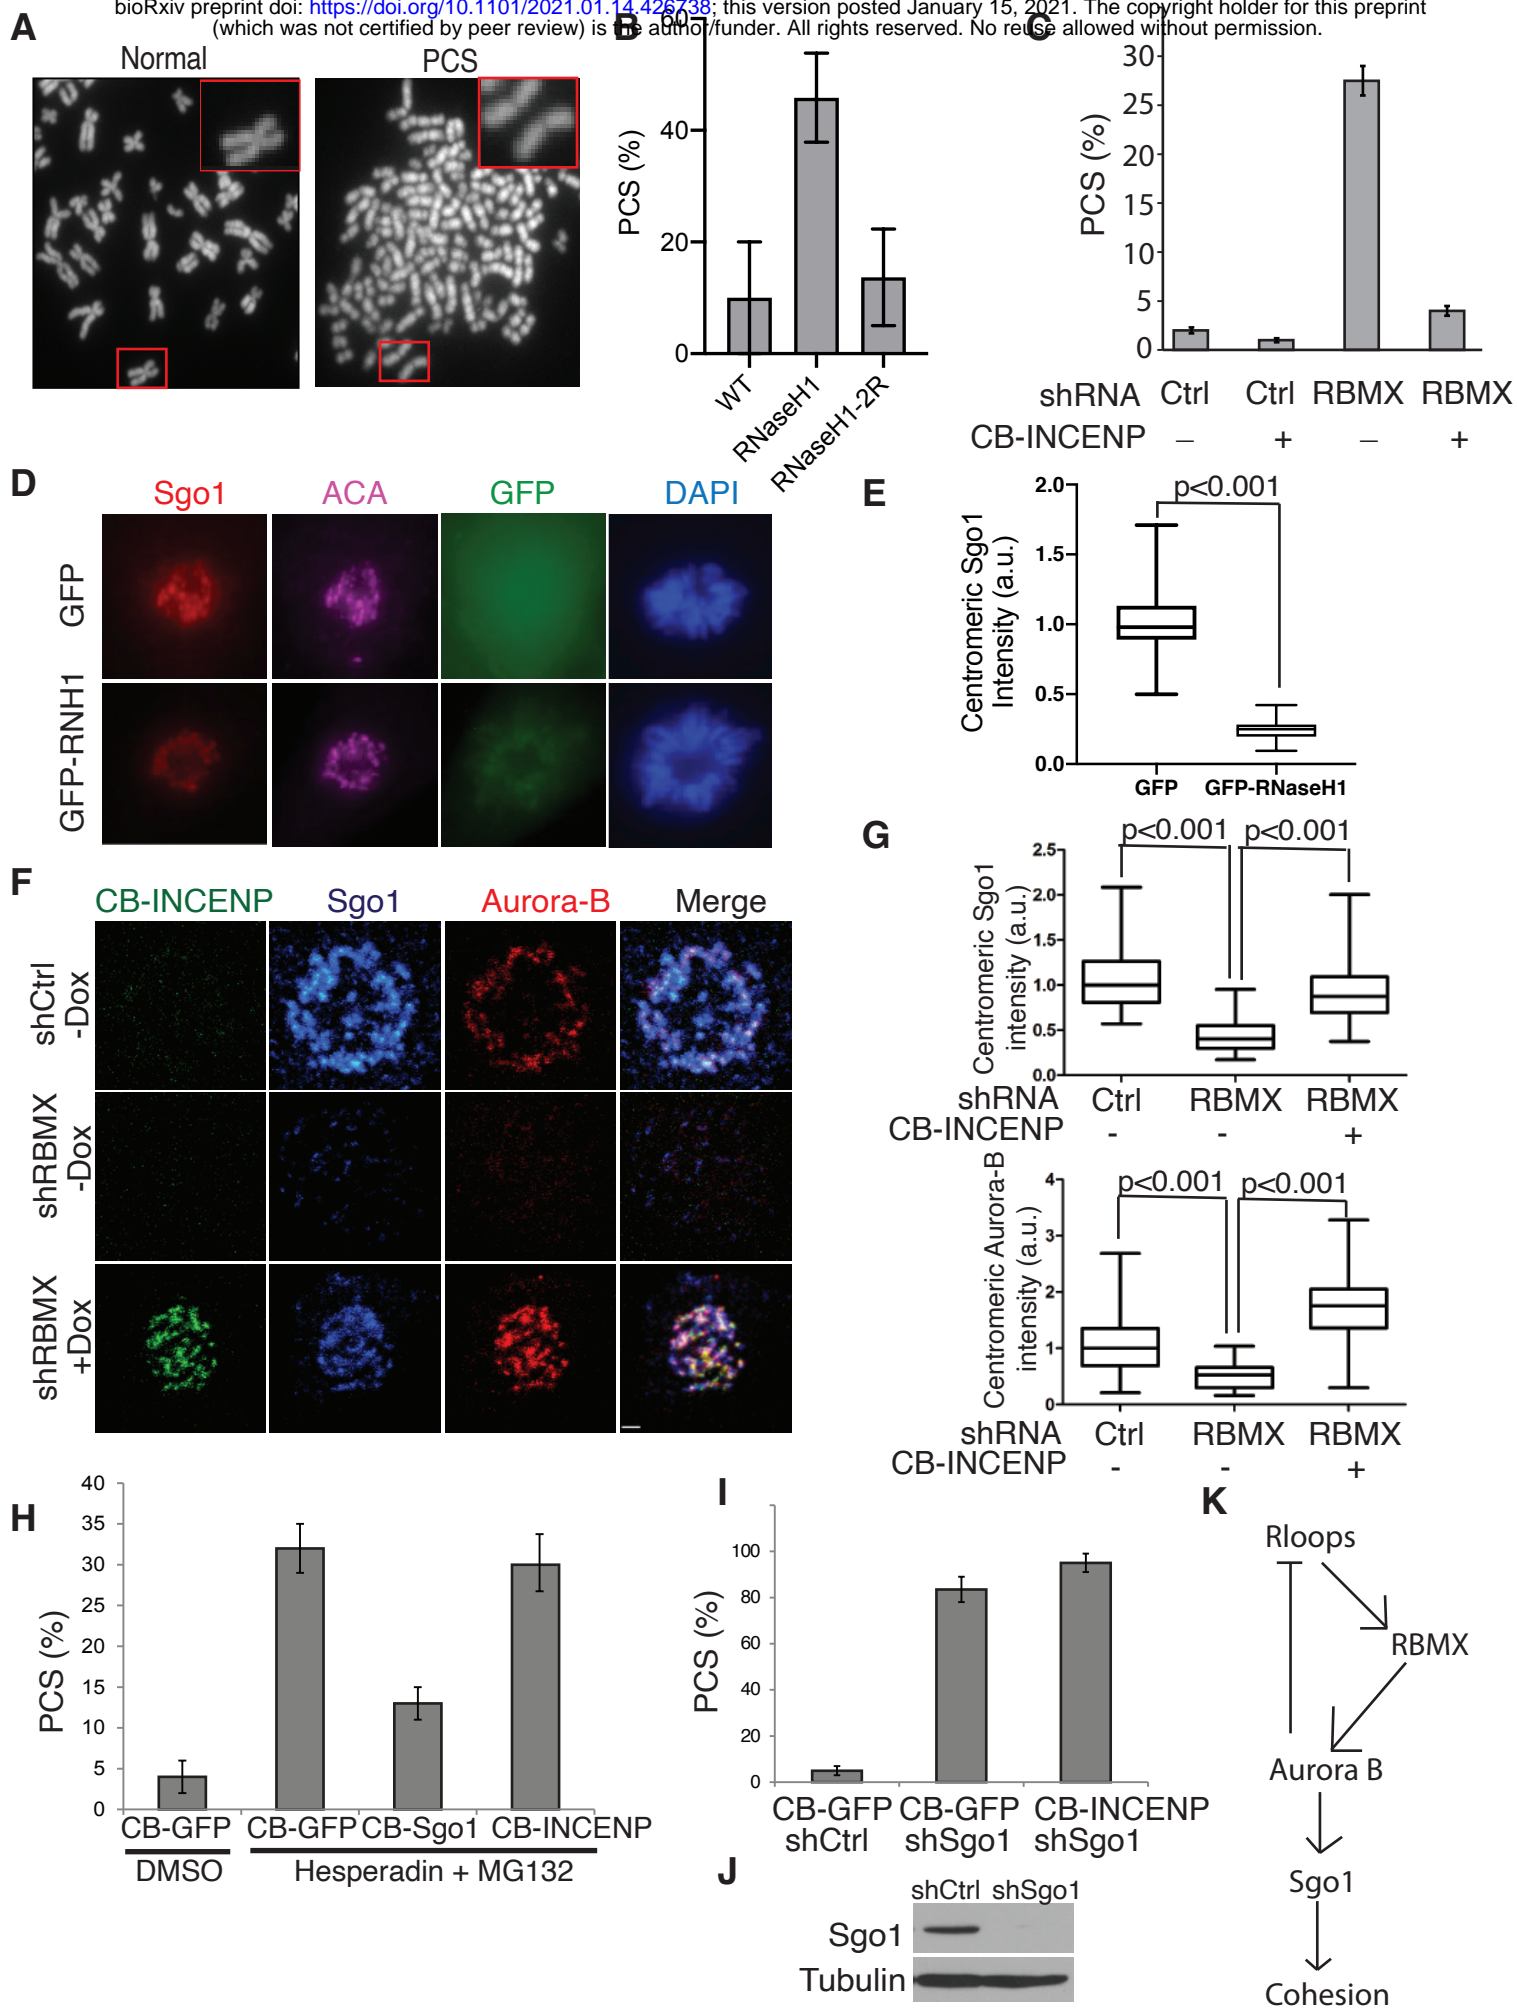

**Figure 7. R-loops and RBMX recruit Aurora B to recruit Sgo1 and maintain centromeric cohesion**

**A**

**Chromatin R-loops**

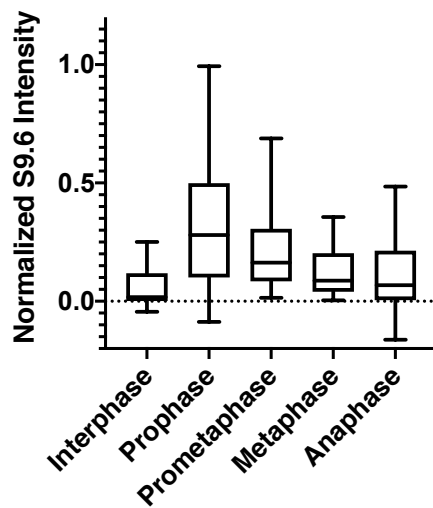

**B**

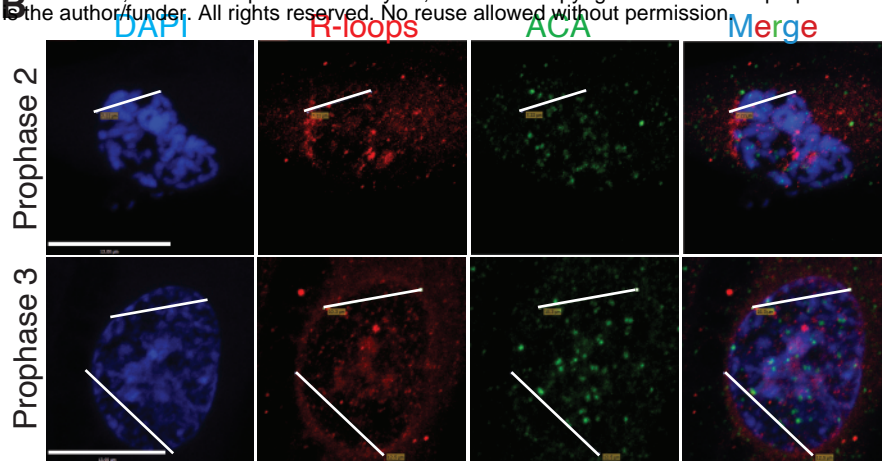

**C**

**Centromere R-loops**

Interphase  
Prophase  
Prometaphase  
Metaphase  
Anaphase

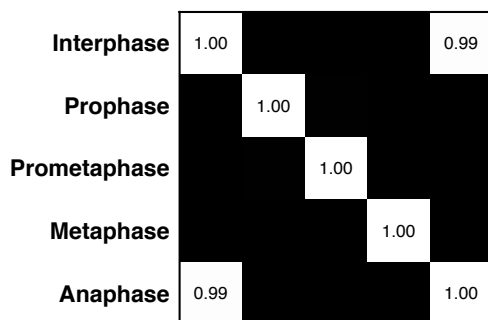

**Chromatin R-loops**

Interphase  
Prophase  
Prometaphase  
Metaphase  
Anaphase

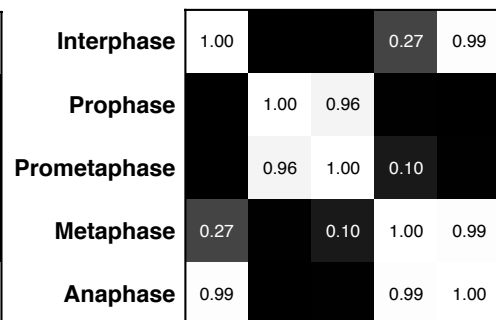

**Arm R-loops**

Interphase  
Prophase  
Prometaphase  
Metaphase  
Anaphase

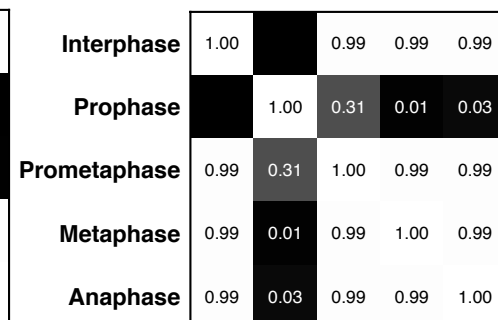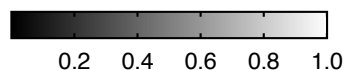

Supplemental figure 1. R-loops are associated with condensing chromatin.

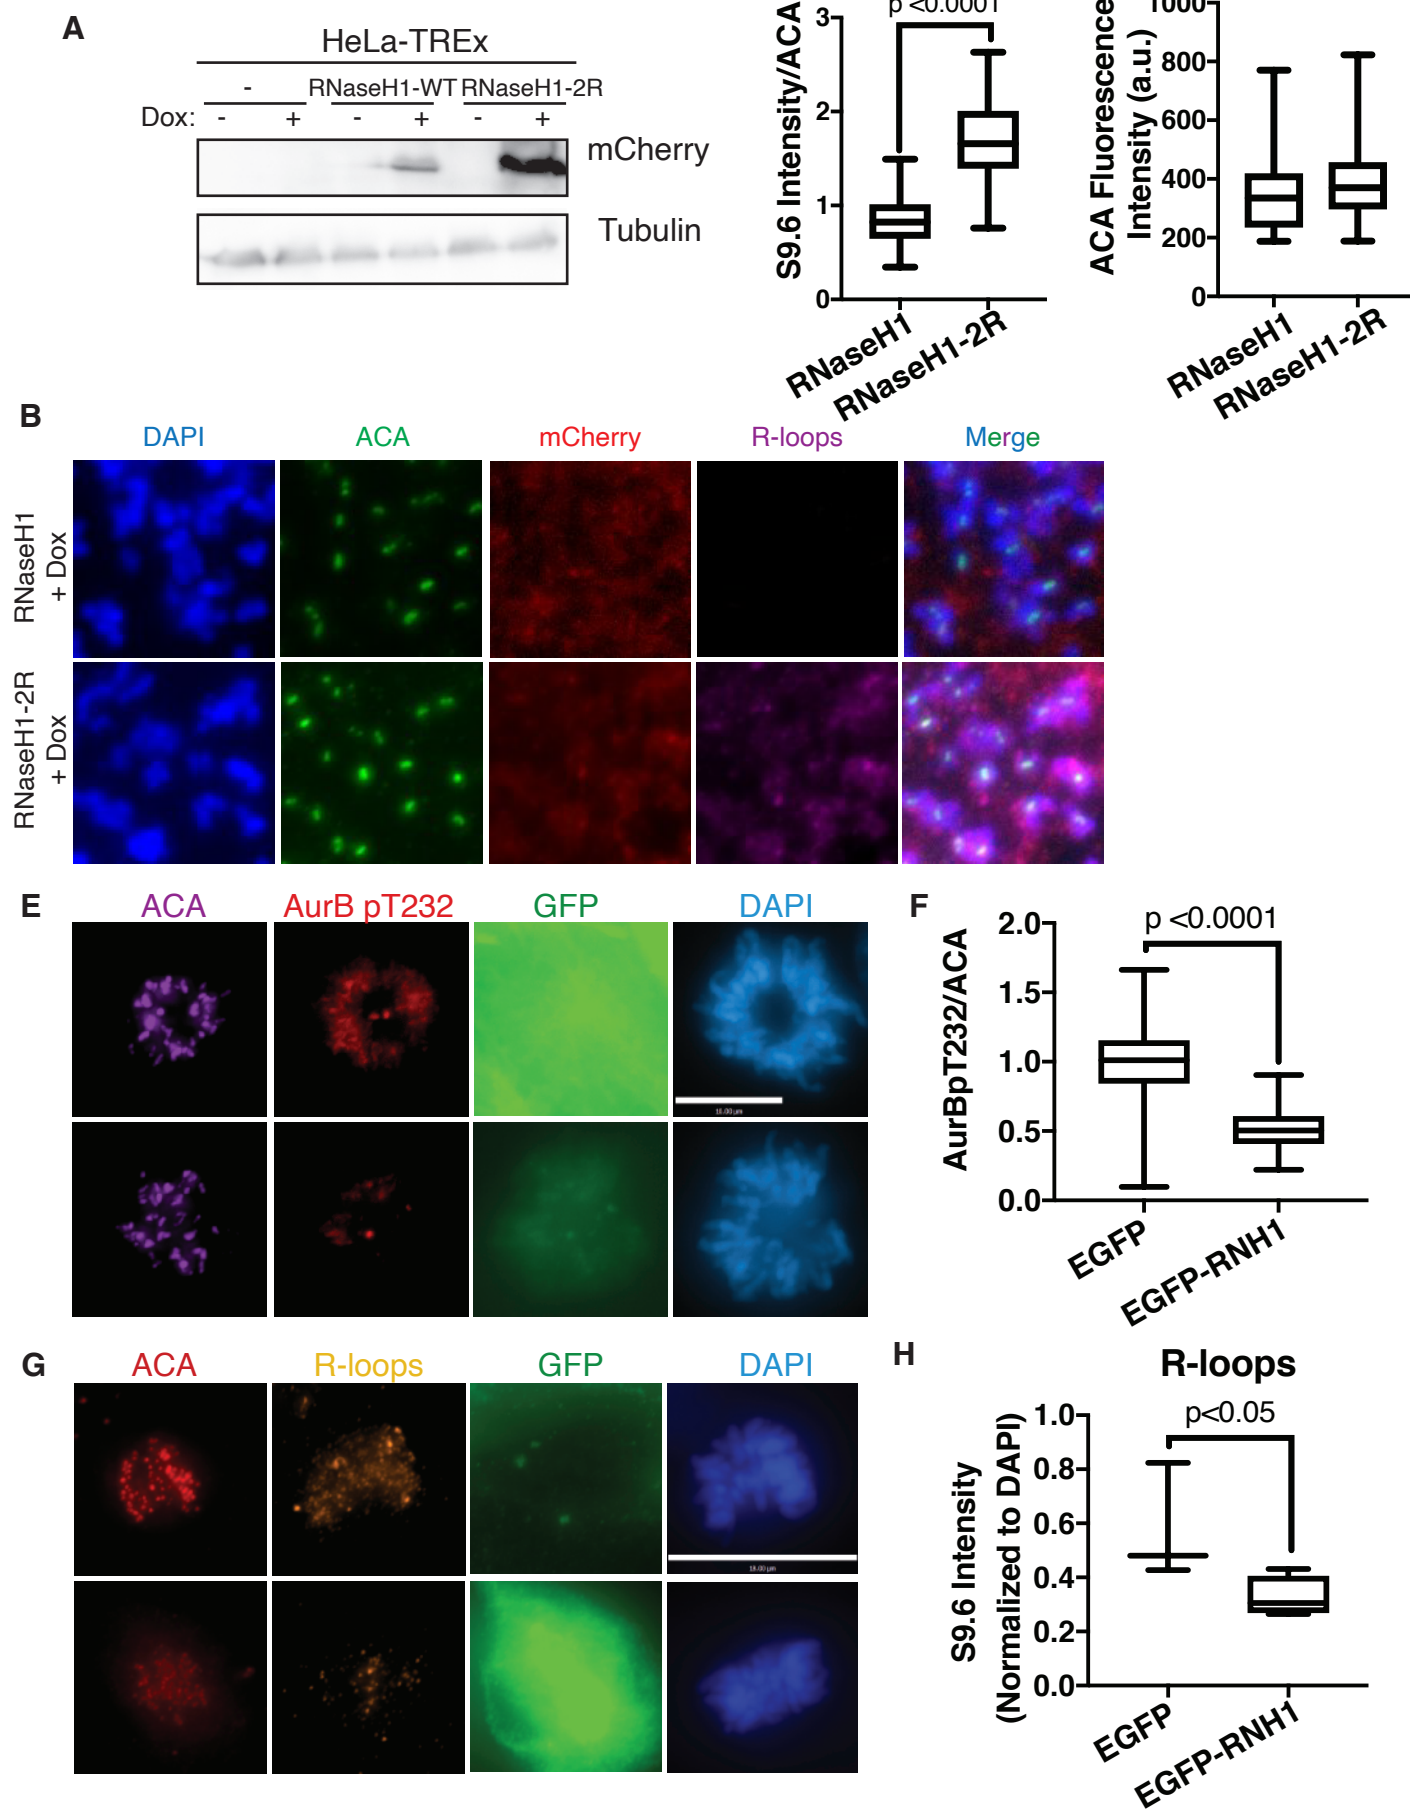

Supplemental figure 2. RNaseH1 overexpression controls R-loop prevalence, Aurora B activation



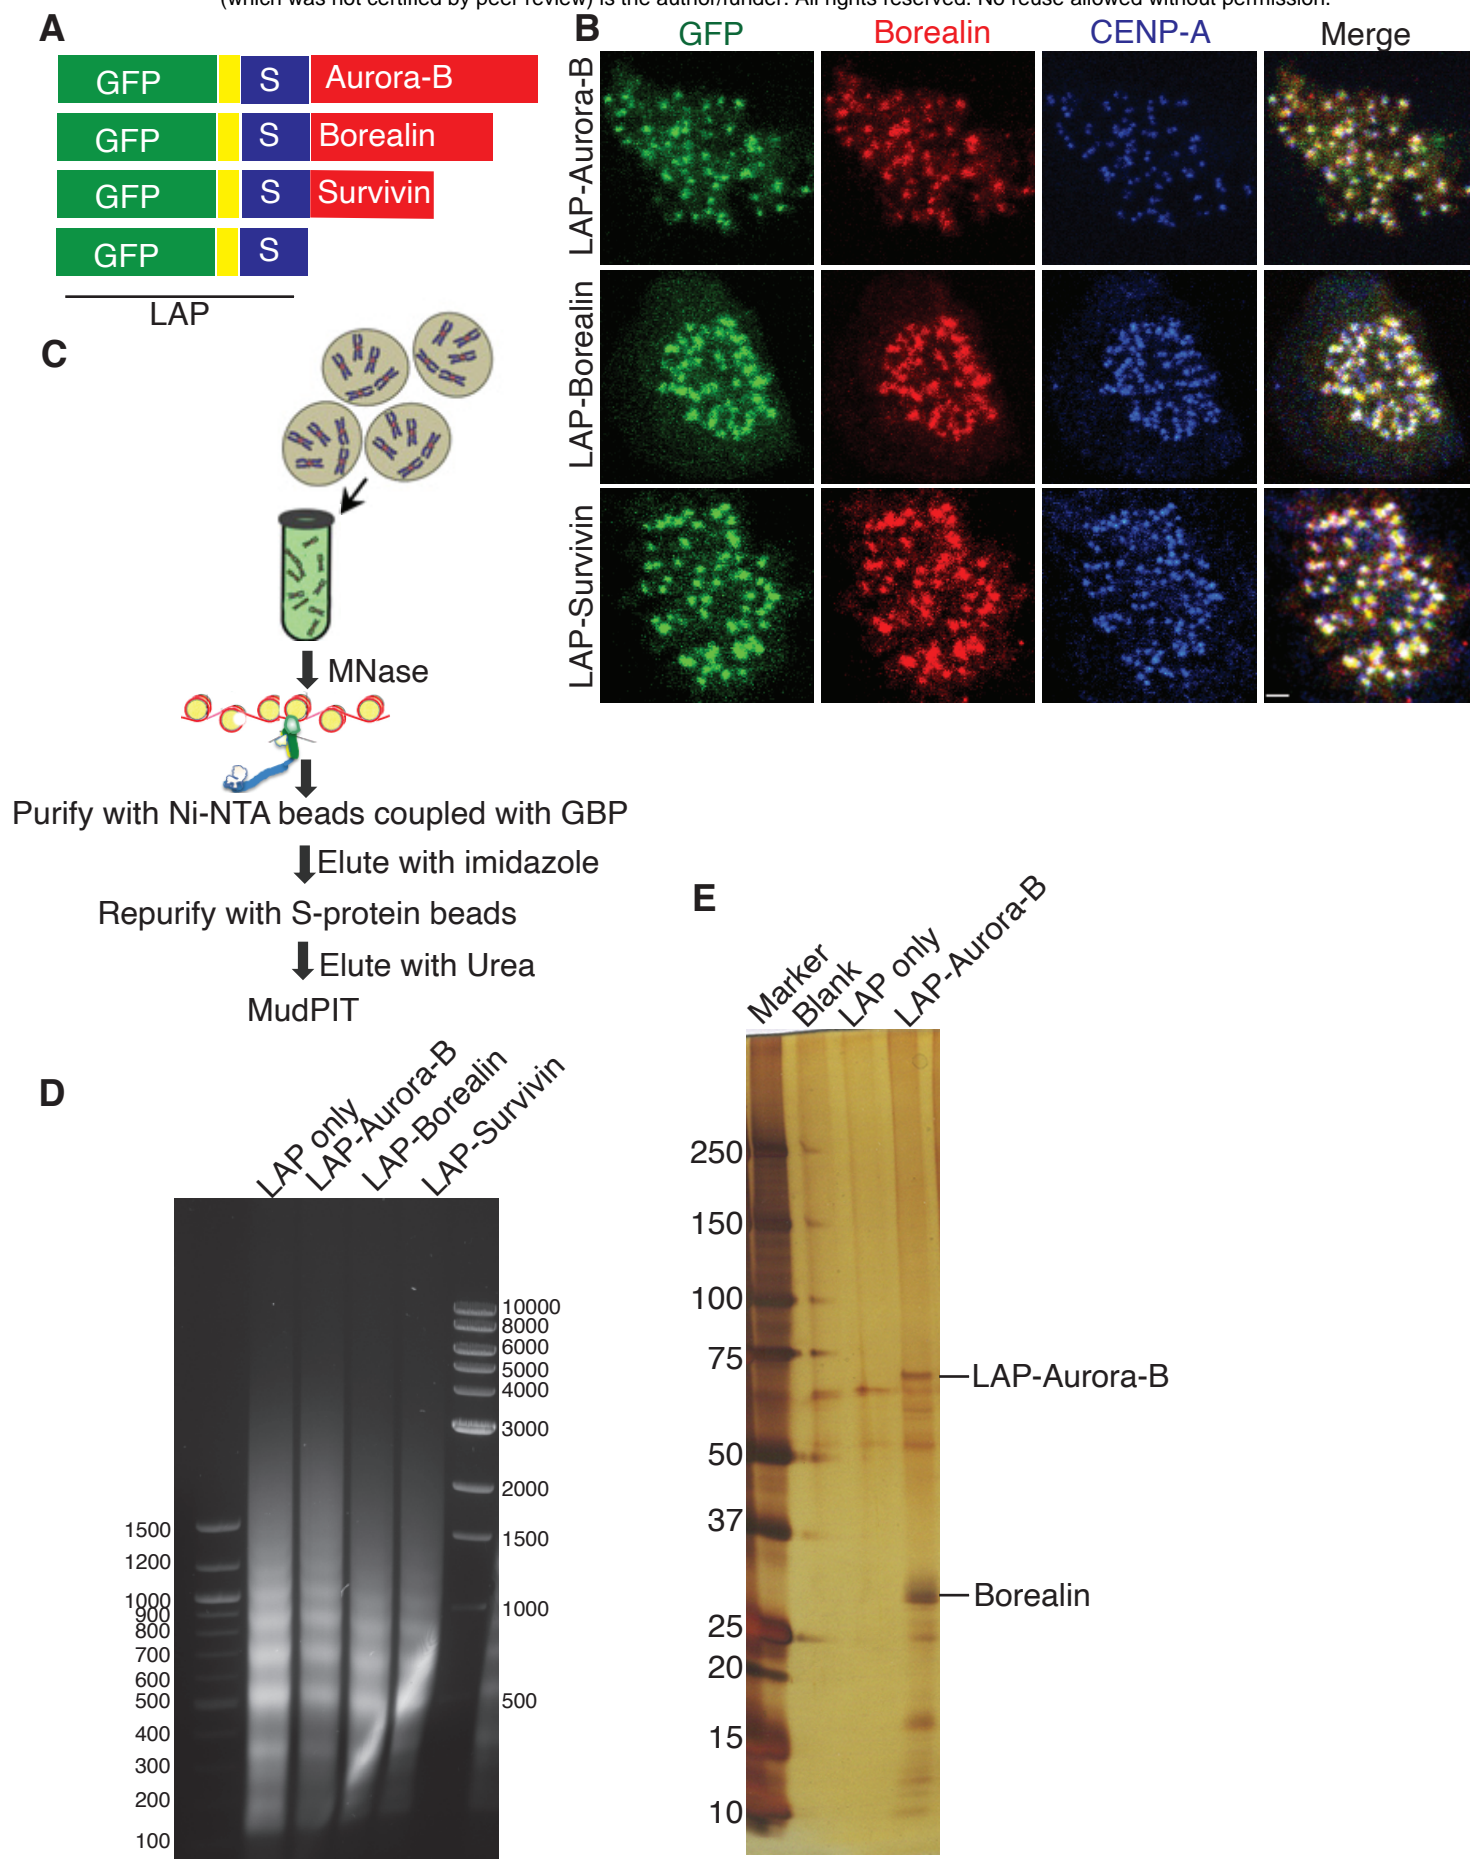

Supplemental figure 3. Validation of MudPIT analysis of CPC members.

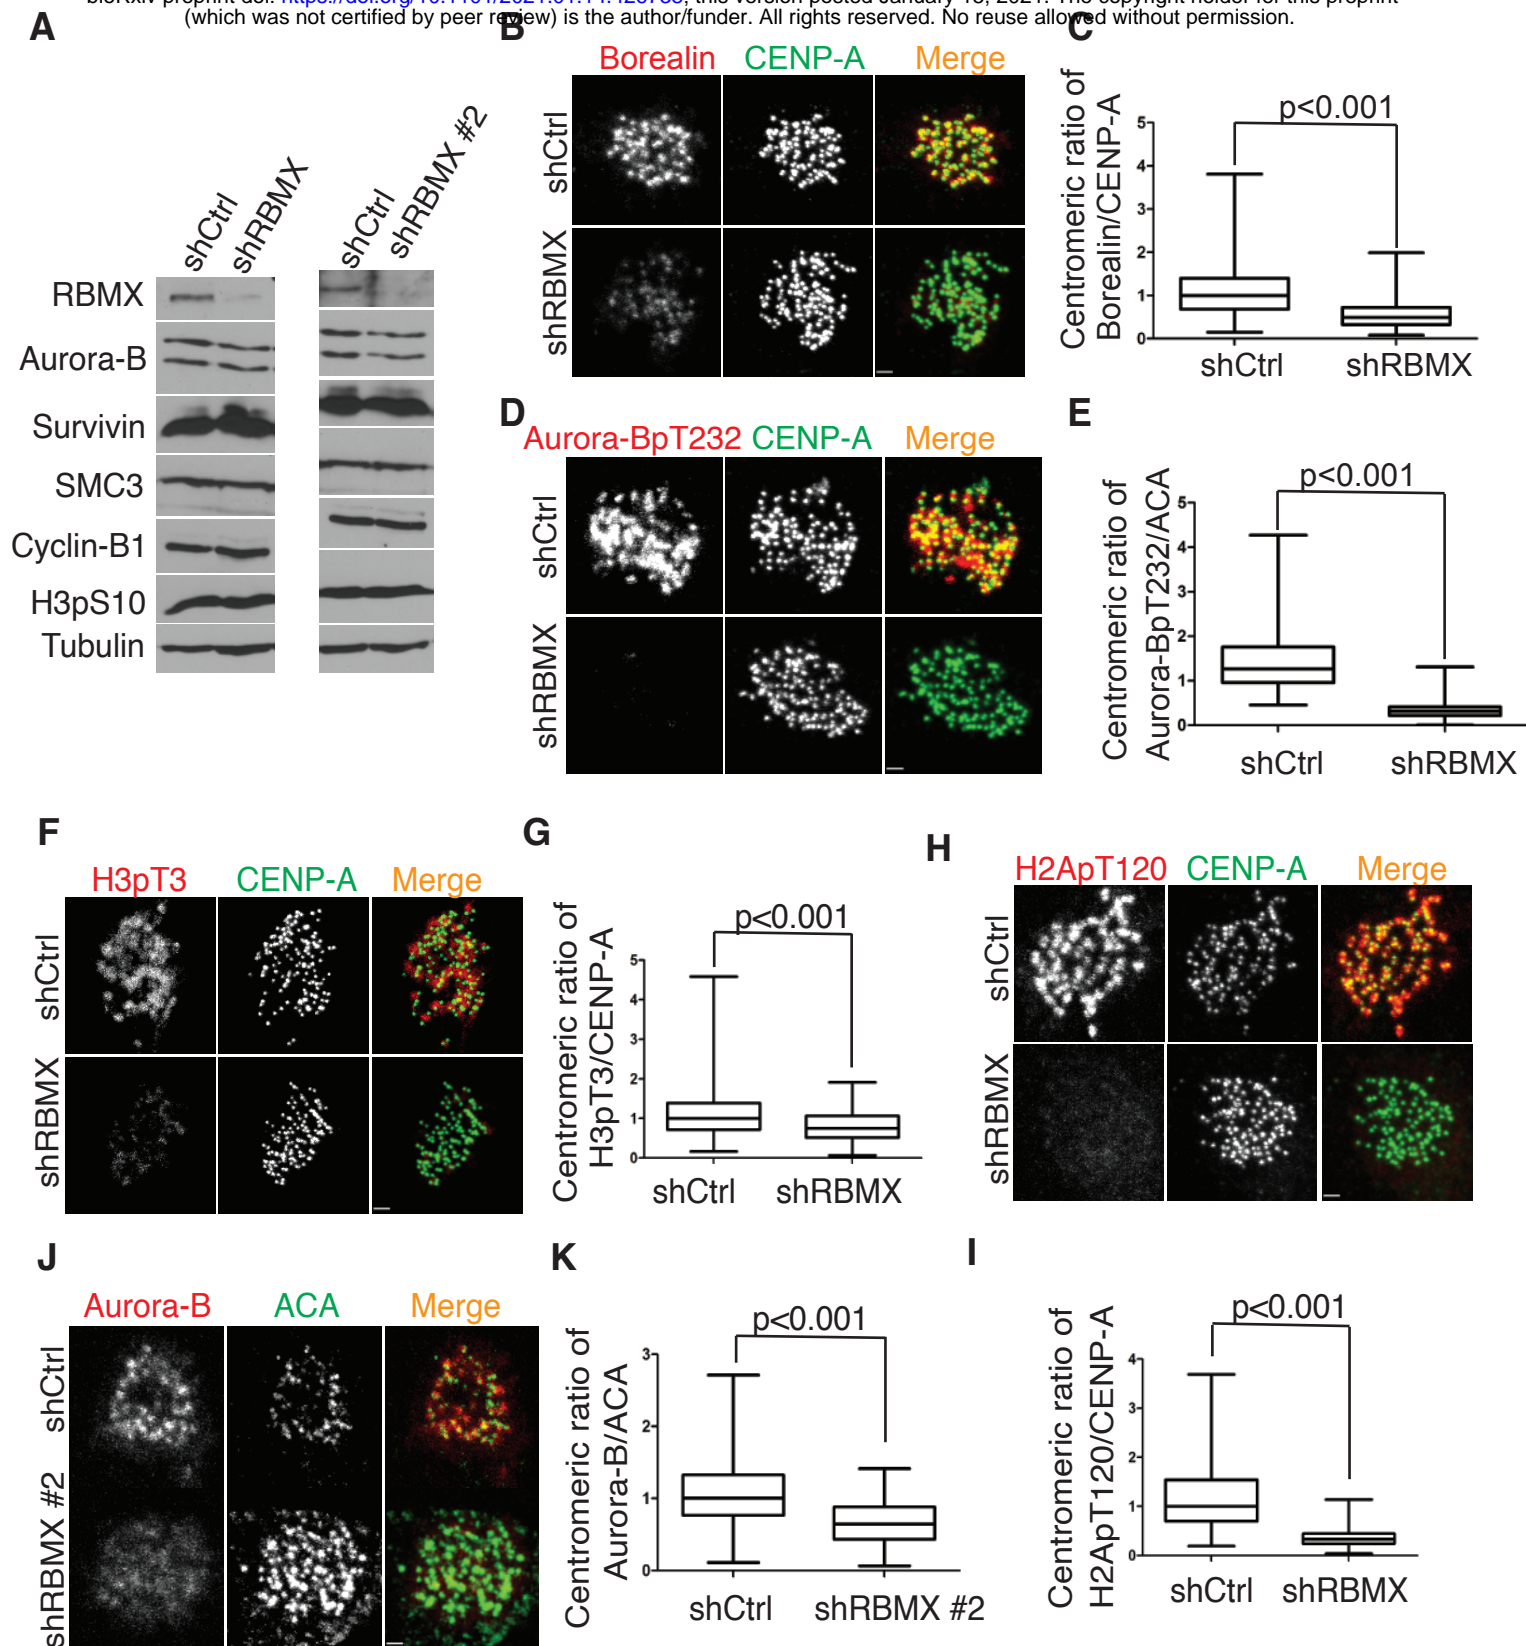

Supplemental figure 4. RBMX is necessary to localize the CPC and CPC localization signals.

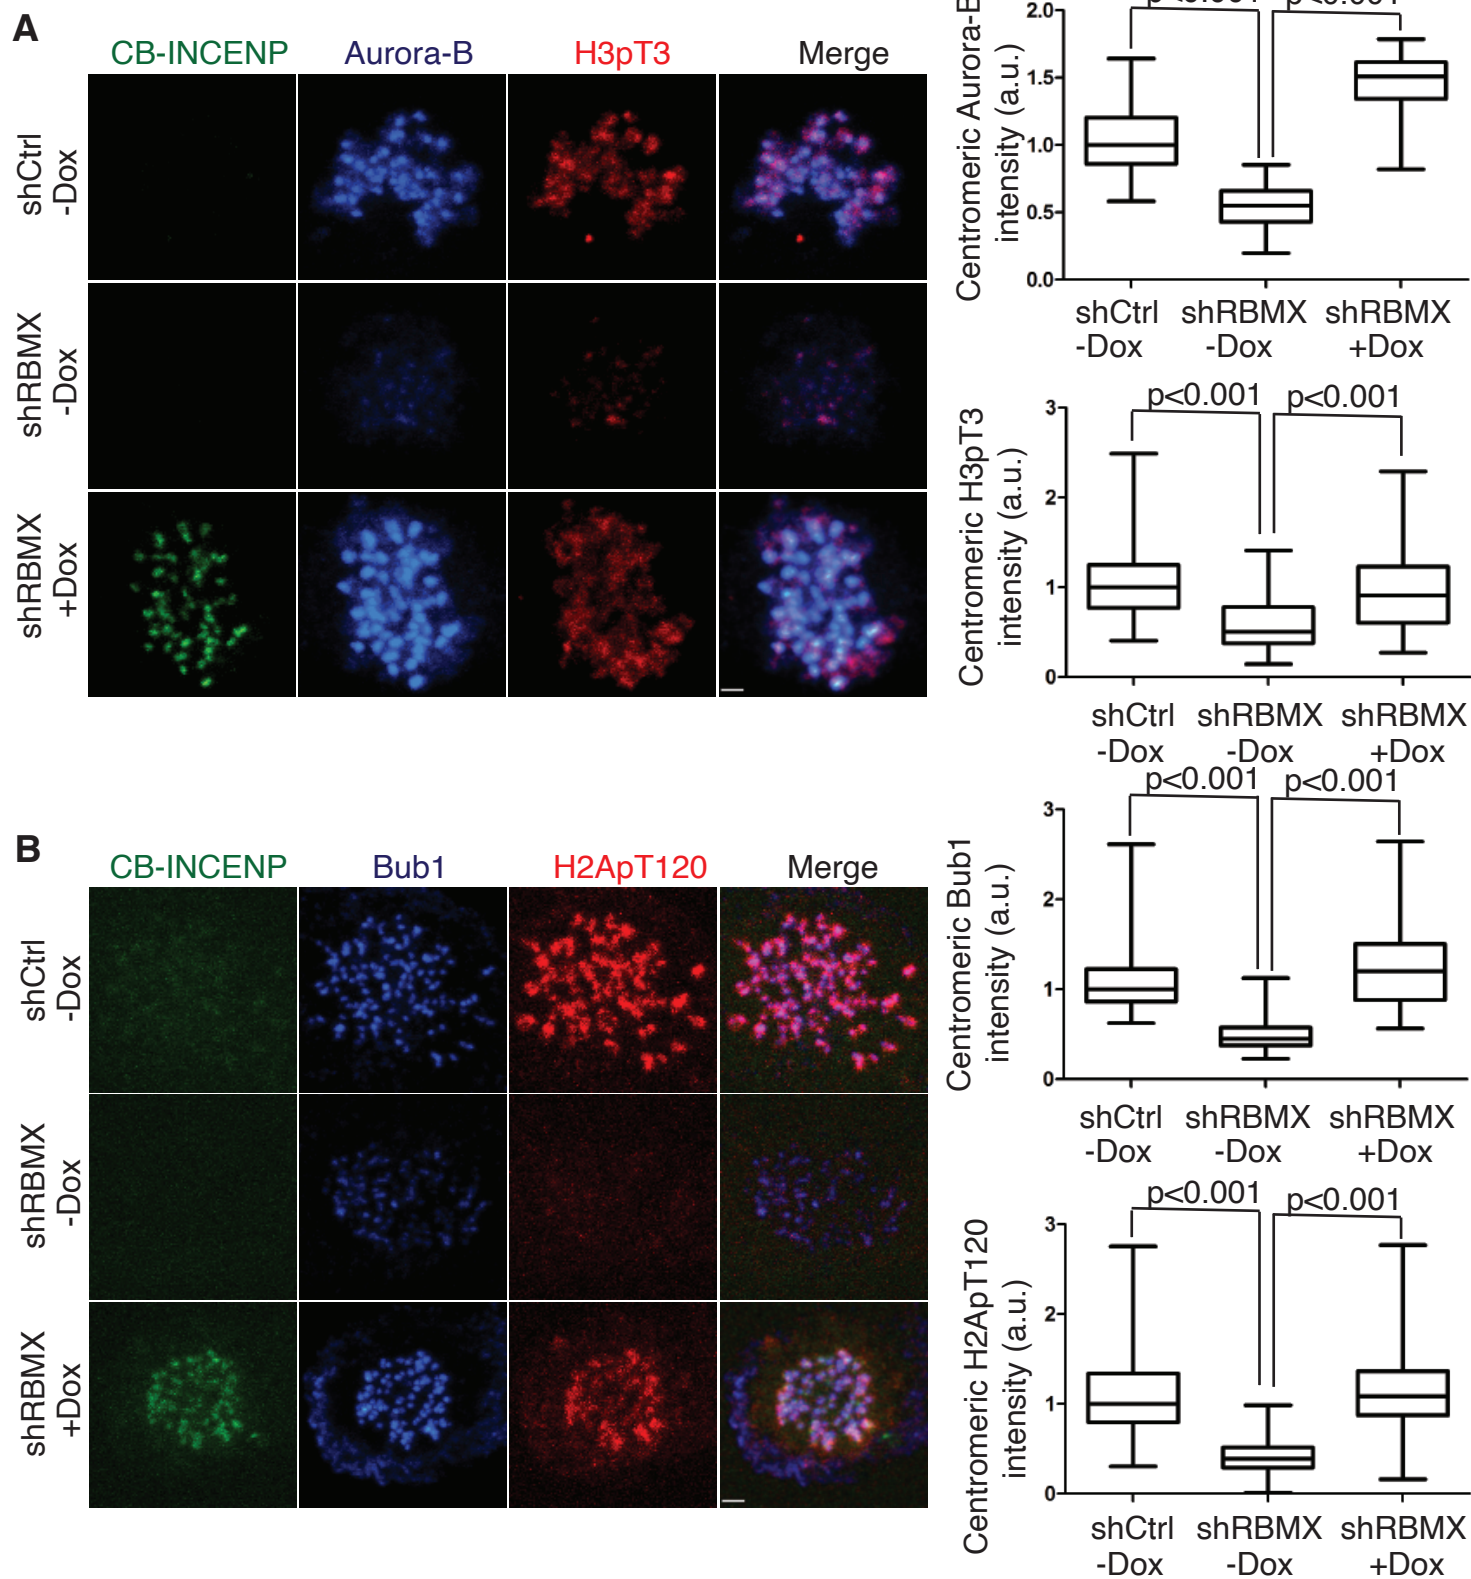

**Supplemental figure 5. RBMX is necessary to localize the CPC and CPC localization signals in an Aurora B activity dependent manner.**



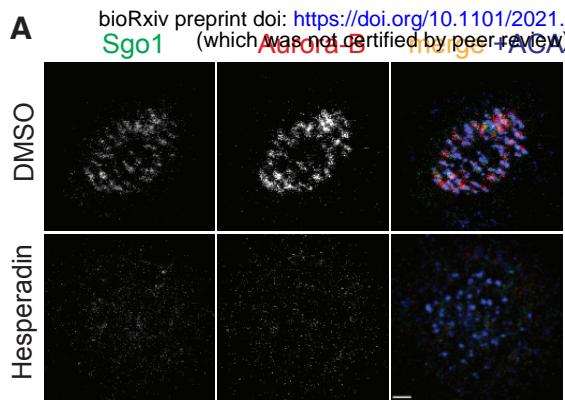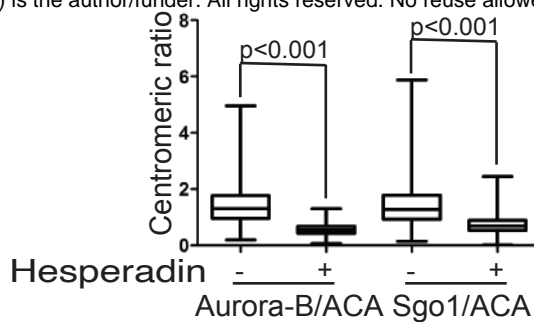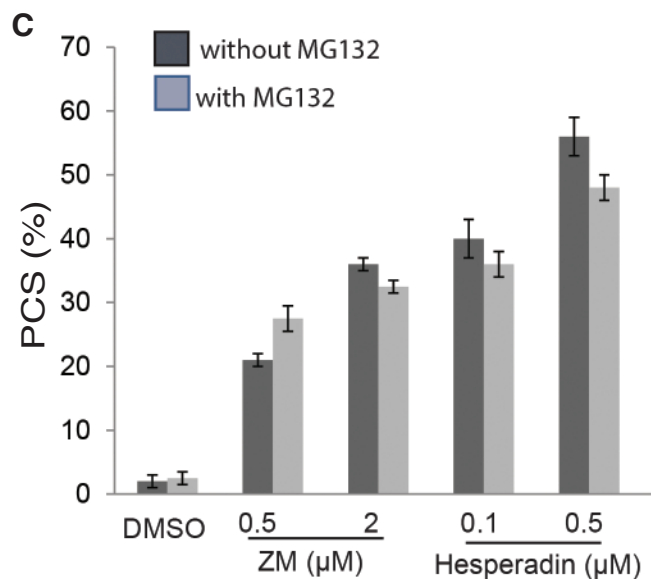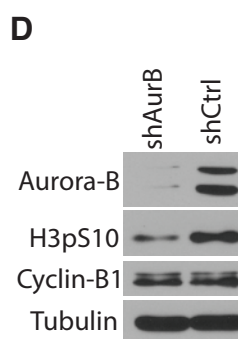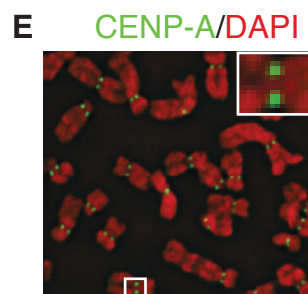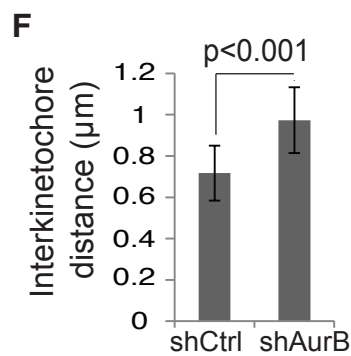

**Supplemental figure 6. Aurora B controls localization of Sgo1, centromeric cohesion**
